# Supplementary material for: The value of intervening for intimate partner violence in South African primary care: project evaluation
Source: PubMed Central journal article supplement — BMJ Open. 2011 Dec 6;1(2):e000254. doi: 10.1136/bmjopen-2011-000254 (PMC3236818; doi:10.1136/bmjopen-2011-000254), 2011-12-06
Supplement: bmjopen-2011-000254-s1.pdf [file bmjopen-2011-000254-s1.pdf]

---

---

---

---

---

3) Has anything changed as a result of your initial meeting with the researcher? If so, please explain:

---

---

---

---

---

---

---

---

---

---

4) How are things going for you in the relationship at the moment?

---

---

---

---

---

---

---

---

5) Do you have any comments about the healthcare provider who saw you at the last meeting?

---

---

---

---

---

---

---

---

SPECIAL INVESTIGATIONS

- |     |                     |     |    |     |
|-----|---------------------|-----|----|-----|
| 6)  | HIV Testing done?   | Yes | No | Pos |
|     |                     | Neg |    |     |
| 7)  | STI detected?       | Yes | No | Pos |
|     |                     | Neg |    |     |
| 8)  | Treatment received? | Yes | No |     |
| 9)  | RPR done?           | Yes | No | Pos |
|     |                     | Neg |    |     |
| 10) | Treatment received? | Yes | No |     |
| 11) | Pregnancy Test:     | Yes | No | Pos |
|     |                     | Neg |    |     |
| 12) | X-rays:             | Yes | No |     |

13) How did you find the safety assessment?

---

---

---

---

14) A safety plan was discussed with you. How was it useful or not useful?

---

---

---

---

---

---

---

---

very useful      useful      not useful      harmful

15) Went to magistrate court for protection order?

Yes      No

How was it helpful or unhelpful for you?

---

---

---

very helpful      helpful      unhelpful      harmful

16) Went to police station for criminal charge? Yes

No

How was it helpful or unhelpful for you?

---

very helpful      helpful      unhelpful      harmful

16) Went to NGO for counselling?

Yes

No

How was it helpful or unhelpful for you?

---

---

---

---

---

---

very helpful      helpful      unhelpful      harmful

17) Went to NGO for legal support?      Yes      No

How was it helpful or unhelpful for you?

---

very helpful      helpful      unhelpful      harmful

18) Went to PGWC social worker      Yes      No

How was it helpful or unhelpful for you?

---

---

---

---

---

very helpful      helpful      unhelpful      harmful

19) Went to shelter screening appointment?      Yes      No

How was it helpful or unhelpful for you?

---

---

---

---

---

very helpful      helpful      unhelpful      harmful

20) Other: \_\_\_\_\_ Yes No

How was it helpful or unhelpful for you?

---

---

---

---

very helpful

helpful

unhelpful

harmful
