# Supplementary material for: The value of intervening for intimate partner violence in South African primary care: project evaluation
Source: PubMed Central journal article supplement — BMJ Open. 2011 Dec 6;1(2):e000254. doi: 10.1136/bmjopen-2011-000254 (PMC3236818; doi:10.1136/bmjopen-2011-000254), 2011-12-06
Supplement: bmjopen-2011-000254-s2.pdf [file bmjopen-2011-000254-s2.pdf]

## Appendix A : Protocol for First Interview

Researcher: \_\_\_\_\_ Patient Code: \_\_\_\_\_

### REPORT ON DOMESTIC VIOLENCE EXAMINATION

#### PATIENT INFORMATION:

Name: \_\_\_\_\_ Age: \_\_\_\_\_

Current Residential Address:

\_\_\_\_\_  
\_\_\_\_\_

Tel No: (h): \_\_\_\_\_ (w): \_\_\_\_\_ (cell): \_\_\_\_\_

Safe to phone? \_\_\_\_\_

Date of Examination: / / Time of Examination: h

Marital Status: Married in COP  / Married with ANC  / Traditional  Divorced  /  
Same-sex partner  / Single  / Co-habiting

Children number total: \_\_\_\_\_ Own:  Step:

Ages and gender of children: Girls: 0-5yrs  / 6-10yrs  / 11-15yrs  / 16-20yrs  / 20yrs

Boys: 0-5yrs  / 6-10yrs  / 11-15yrs  / 16-20yrs  / 20yrs

Whereabouts: House  / Sub-district  / W.Cape  / Out of W.Cape

Patient Accompanied by: relative  / friend  / other \_\_\_\_\_

Did perpetrator accompany? \_\_\_\_\_

#### ADDITIONAL INFORMATION

Has a criminal charge been laid?  Yes  No

If yes, what charge was laid? Assault  / grievous bodily harm  / rape  / indecent assault  /  
Contravention of protection order

Name of SAPS station: \_\_\_\_\_ CAS No: \_\_\_\_\_

If no, does the patient intend laying a charge?

Yes

No

Unsure

Does patient have a Protection Order? Yes  / No

Name of magistrate court: \_\_\_\_\_

If no, intends to apply for protection order; Yes  / No  / Unsure

### 1. HISTORY OF MOST RECENT ASSAULT

Location of incident: \_\_\_\_\_

Date of incident: \_\_\_\_\_

Time of incident: \_\_\_\_\_

Relationship of assailant: partner  / ex- partner

\_\_\_\_\_

Nature of the abuse

| PHYSICAL                                 | EMOTIONAL                                                          | SEXUAL                                      | FINANCIAL                                          |
|------------------------------------------|--------------------------------------------------------------------|---------------------------------------------|----------------------------------------------------|
| Hitting <input type="checkbox"/>         | Name Calling <input type="checkbox"/>                              | Unwanted Touching <input type="checkbox"/>  | Withholding Money <input type="checkbox"/>         |
| Kicking <input type="checkbox"/>         | Yelling/Shouting <input type="checkbox"/>                          | Infidelity <input type="checkbox"/>         | Taking Money <input type="checkbox"/>              |
| Use of a weapon <input type="checkbox"/> | Restricting contact with Family / Friends <input type="checkbox"/> | STI's <input type="checkbox"/>              | Controlling All Decisions <input type="checkbox"/> |
| Pushing <input type="checkbox"/>         | Threats <input type="checkbox"/>                                   | Forced Intercourse <input type="checkbox"/> | Other _____                                        |
| Choking <input type="checkbox"/>         | Controlling her activities <input type="checkbox"/>                | Other _____                                 |                                                    |
| Burns <input type="checkbox"/>           | Other _____                                                        |                                             |                                                    |

Other  
\_\_\_\_\_

Patient's description of most recent assault (Use exact words as far as possible. Describe severity of assault.)

\_\_\_\_\_  
\_\_\_\_\_  
\_\_\_\_\_  
\_\_\_\_\_  
\_\_\_\_\_



---



---



---



---



---

3. **Emotional Status:**

### Mental Problems Checklist

The questions can be used to test the hypothesis of “mental problems?” The questions were developed in the context of Khayelitsha a Xhosa speaking township.

- 1. Are you thinking too much ?.....
- 2. How are you sleeping at the moment?.....
- 3. Do you feel exhausted or tired even when you are not working hard? .....
- 4. Do you feel sad or like crying for no reason ?.....
- 5. As a person there are things that you enjoy doing – do you find that you no longer enjoy these things? I.e. listening to music or going out with friends.....
- 6. Do you sometimes have the feeling as though you are going to hear bad news?....
- 7. a) Have you ever felt you should cut down on your drinking?.....
- b) Have people annoyed you by criticizing your drinking? .....
- c) Have you ever felt bad or guilty about your drinking?.....
- d) Have you ever had an eye-opener first thing in the morning to steady your Nerves or to get rid of a hangover?.....
- 8. Have you experienced traumatic events that made you feel extremely threatened or Endangered? Or witnessed someone else in this situation?.....

If positive to **any one** further assessment may be required – see Mental Problems Flowchart.

If positive to **2, 3, 4, 5** then consider **depression**.  
 If positive to **1, 2, 6** consider **anxiety disorders**.  
 If positive to **7** consider **alcohol use disorders**.  
 If positive to **8** consider **post traumatic stress disorder**.

### Mental Problems Checklist

These questions can be used to test the hypothesis of “mental problems?” The questions are taken directly from the ICD-10 Classification.

- 1. Low mood or sadness?.....
- 2. Loss of interest or pleasure?.....
- 3. Decreased energy and / or increased fatigue?.....
- 4. Have you had any problems with sleep?.....
- 5. Feeling tense or anxious?.....
- 6. Worrying a lot about things?.....
- 7. a) No. of standard drinks in a typical day when drinking?.....

- b) No. of days / wk having alcoholic drinks?.....
8. Have you experienced traumatic events that made you feel extremely threatened or Endangered? Or witnessed someone else in this situation?.....

If positive to **any one** of these questions further assessment may be required – see Mental Problems Flowchart

Positive to **1, 2, 3 or 4** consider **depression**  
 Positive to **5 or 6** consider **anxiety depression**  
 If **7** is 21/wk or more for men or 14/wk or more for women consider **alcohol use disorders**

In the last year have you used any of the following substances?

1. Dagga
2. Mandrax
3. Tic
4. Tobacco / cigarettes / pipe
5. Cocaine / crack
6. Heroine
7. Benzene or solvents
8. Sniffed Glue
9. Ecstasy

|                                                         |     |                          |    |                          |
|---------------------------------------------------------|-----|--------------------------|----|--------------------------|
| Depression requiring further assessment?                | Yes | <input type="checkbox"/> | No | <input type="checkbox"/> |
| PTSD requiring further assessment?                      | Yes | <input type="checkbox"/> | No | <input type="checkbox"/> |
| Anxiety disorder requiring further assessment?          | Yes | <input type="checkbox"/> | No | <input type="checkbox"/> |
| Alcohol/subs use disorder requiring further assessment? | Yes | <input type="checkbox"/> | No | <input type="checkbox"/> |

**4. Medical Information:**

Pregnant?  Yes  No

Normal menses in last month:  Yes  No

Other medical symptoms coded as per ICPC:  
 \_\_\_\_\_

STI SYNDROMES:

- Vaginal Discharge Syndrome
- Genital Ulcer Syndrome
- Lower Abdominal Pain

- Moluscum Contagiosum
- Genital Warts
- Pubic Lice
- Herpes Simplex Virus

**5. Examination:**

General Appearance:

\_\_\_\_\_

Height: \_\_\_\_\_ Weight: \_\_\_\_\_ Body Build: \_\_\_\_\_

Description of Injuries: \_\_\_\_\_

---

---

---

---

---

---

---

---

---

Patient Name: \_\_\_\_\_ Folder No. \_\_\_\_\_

**6. Body Charts:**

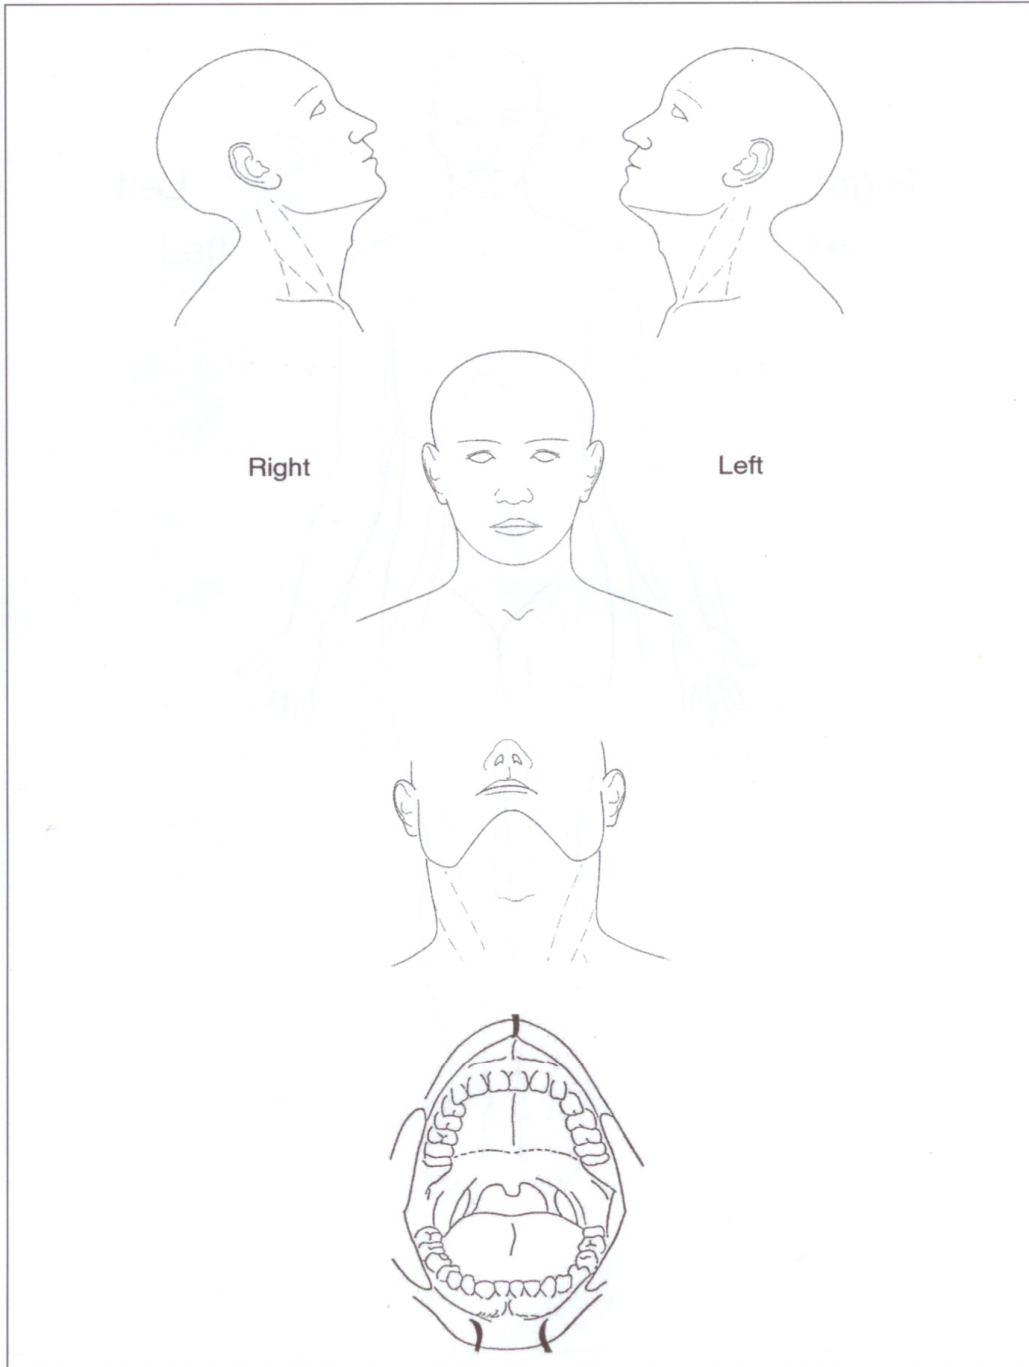





Patient Name: \_\_\_\_\_ Folder No. \_\_\_\_\_

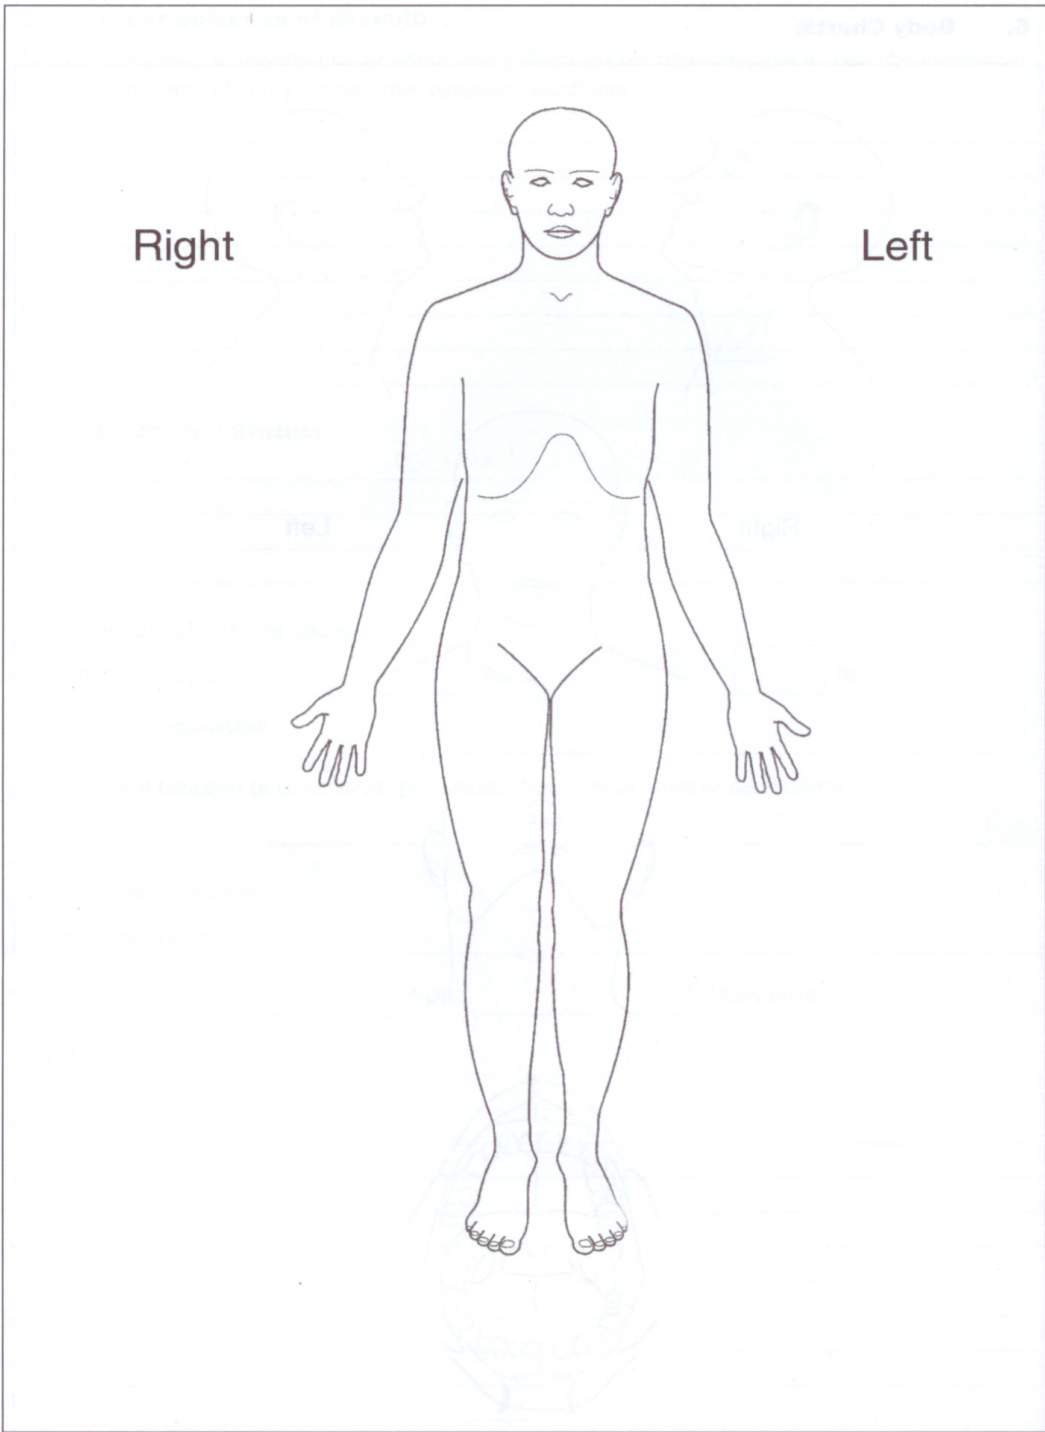



Patient Name: \_\_\_\_\_ Folder No. \_\_\_\_\_

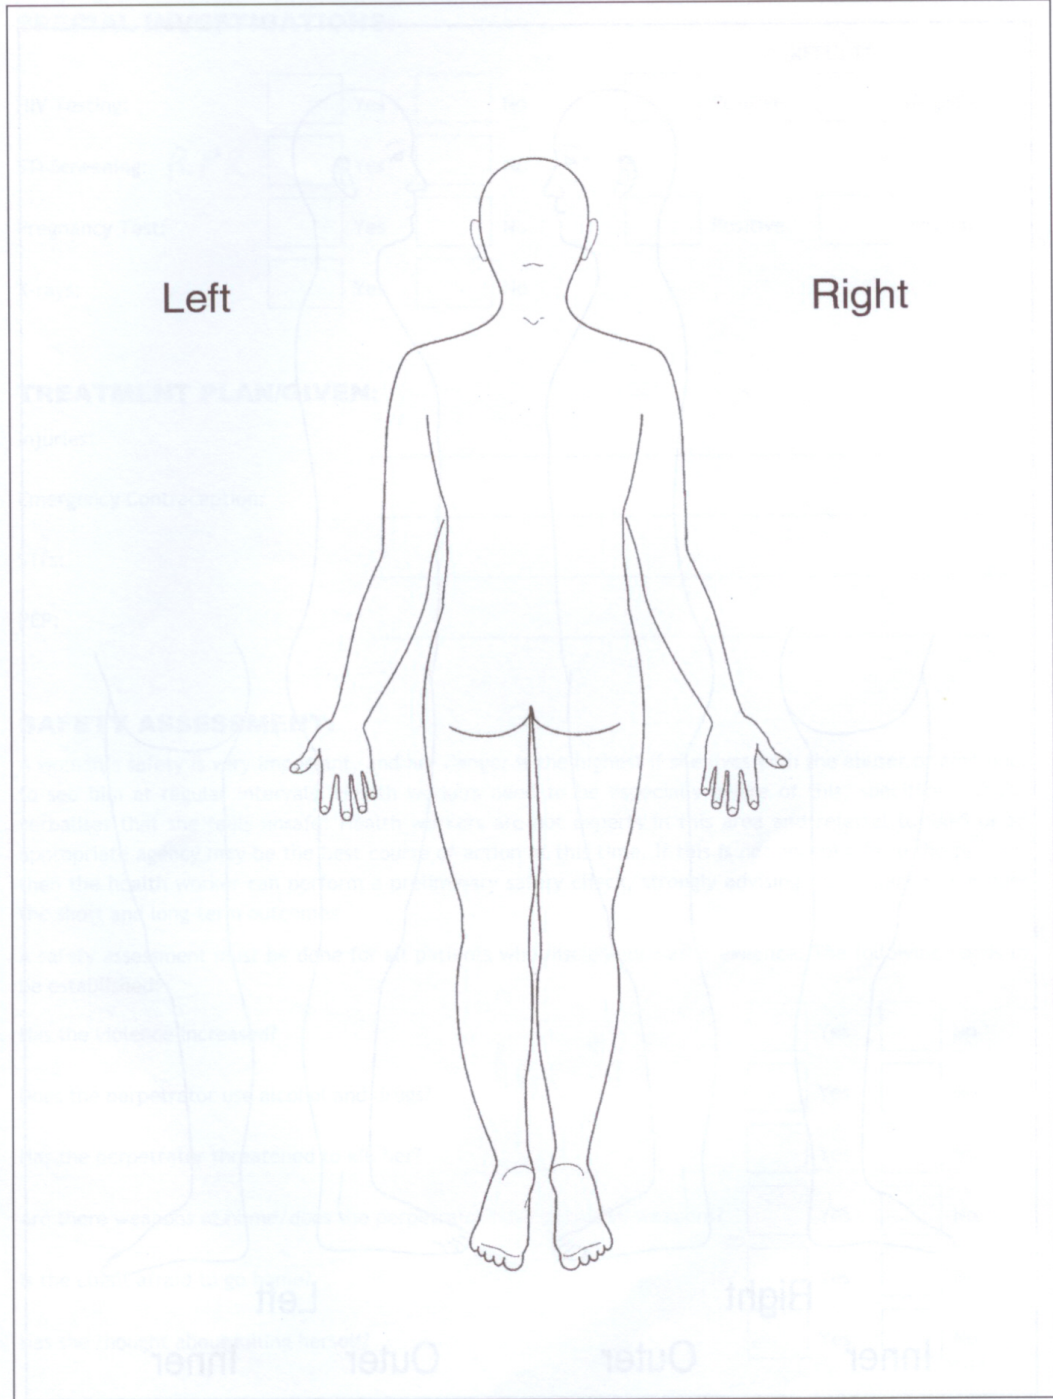



Patient Name: \_\_\_\_\_ Folder No. \_\_\_\_\_

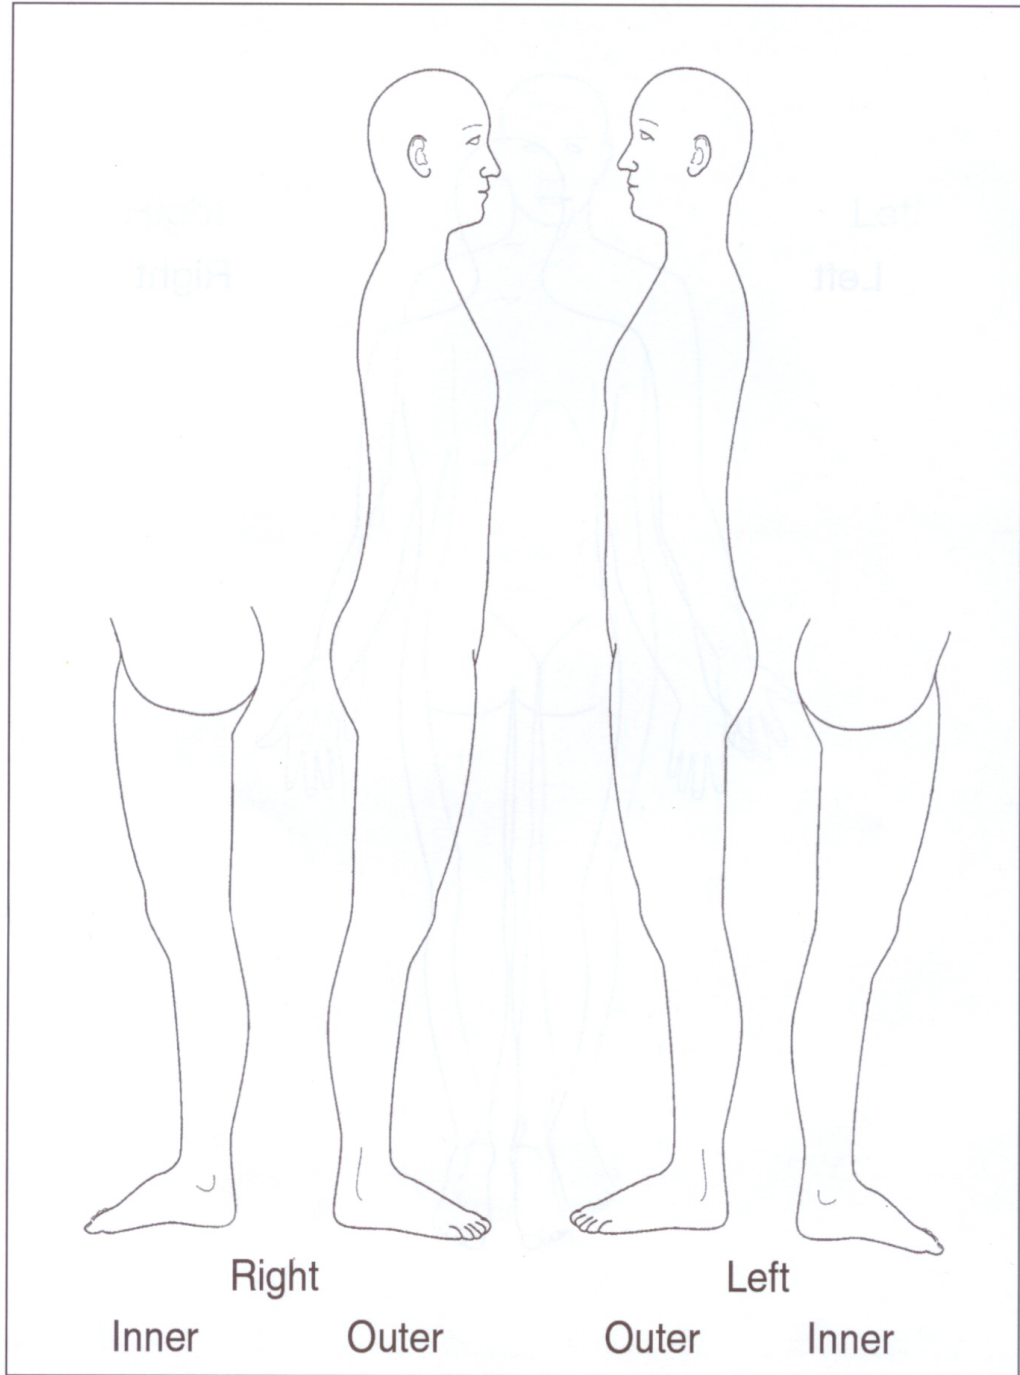

**SPECIAL INVESTIGATIONS NEEDED:**

Year/Date \_\_\_\_\_

1. Prior VCT  Positive  Negative   
Not done

**How did your partner react when you disclosed your status?**

---

---

---

---

---

---

---

---

3. Do you want testing now? Yes  No

RPR:  Yes  No

Pregnancy test:  Yes  No

X-rays:  Yes  No

**TREATMENT PLAN/GIVEN:**

Injuries:  Yes  No

Emergency contraception  Yes  No

STI's:  Yes  No

PEP:  Yes  No

Other medical conditions: \_\_\_\_\_

**SAFETY ASSESSMENT:**

A safety assessment must be done for all patients who disclose domestic violence. Record answers to the following questions. The answers to the questions can be assigned a value for risk assessment. Assign a value for the answers as follows: No = 0      Yes = 1

**Add up the total to provide a risk rating:**      **0 - 3 → Caution**  
**4 - 7 → High Risk**  
**8 - 11 → Severe Risk**

|                                                                                             |                          |     |                          |
|---------------------------------------------------------------------------------------------|--------------------------|-----|--------------------------|
| Has he threatened you with physical violence?<br>No                                         | <input type="checkbox"/> | Yes | <input type="checkbox"/> |
| Has he threatened the children with physical violence?<br>No                                | <input type="checkbox"/> | Yes | <input type="checkbox"/> |
| Is there a firearm in the house?<br>No                                                      | <input type="checkbox"/> | Yes | <input type="checkbox"/> |
| Has he threatened to kill you?<br>No                                                        | <input type="checkbox"/> | Yes | <input type="checkbox"/> |
| Has he threatened to kill the children?<br>No                                               | <input type="checkbox"/> | Yes | <input type="checkbox"/> |
| Does the patient think he is capable of killing her?<br>No                                  | <input type="checkbox"/> | Yes | <input type="checkbox"/> |
| Were alcohol and / or drugs consumed prior to the last incident of abuse?<br>No             | <input type="checkbox"/> | Yes | <input type="checkbox"/> |
| Was SAPS intervention necessary?<br>No                                                      | <input type="checkbox"/> | Yes | <input type="checkbox"/> |
| Is he presently in the home?<br>No                                                          | <input type="checkbox"/> | Yes | <input type="checkbox"/> |
| Has the abuse escalated in either frequency or severity?<br>No                              | <input type="checkbox"/> | Yes | <input type="checkbox"/> |
| Have you ever received medical treatment for injuries sustained as a result of abuse?<br>No | <input type="checkbox"/> | Yes | <input type="checkbox"/> |

Score: 0-3  / 4-7  / 8-11       **TOTAL RATING**

**SAFETY PLAN:**

- Help the client think and plan the following:
- ?      What will you do when you leave the health facility?
  - ?      Will you seek help from SAPS and/ or courts?
  - ?      How will you ensure your children's safety?
  - ?      Where can you go if you need to leave home?
  - ?      Who can you trust to tell about the domestic violence?
  - ?      Where can you leave money, clothing, copies of documents and valuables if necessary?

? Will you accept a list of important telephone numbers referrals to help with longer-term safety planning?

Advise patient to hide a readily packed bag with essential items such as:

- Your ID book.
- Children's birth certificates, hospital cards and other important documents.
- House and car keys, money and bank card.
- Clothes for you and your children.
- Important telephone numbers.
- Copy of the protection order and suspended warrant of arrest if you already have one.

She may also make a list of other things to take with her, for example:

- Children's favourite toys.
- Children's school books and uniforms.
- Toiletries (toothbrush, deodorant, etc).
- Other valuable personal items, for example, photos and jewelry.

***REFERRAL LEGAL AND SOCIAL ISSUES***

Referrals made?  Yes  No

OPTION 1: \_\_\_\_\_

OPTION 2: \_\_\_\_\_

OPTION 3: \_\_\_\_\_

OPTION 4: \_\_\_\_\_

OPTION 5: \_\_\_\_\_

Magistrate court for protection order  Yes  No

Police station for criminal charge  Yes  No

NGO for counseling  Yes  No

NGO for legal support  Yes  No

PGWC social worker  Yes  No

Shelter  Yes  No



Other:

---

**INFORMATION LEAFLET:**

Safe to give a leaflet

Yes

No

**FOLLOW UP:**

Appointment made for follow-up?

Date & Time:

---

Signature:

---

Health Facility:

---

Date:

---
