# Supplementary material for: The value of intervening for intimate partner violence in South African primary care: project evaluation
Source: PubMed Central journal article supplement — BMJ Open. 2011 Dec 6;1(2):e000254. doi: 10.1136/bmjopen-2011-000254 (PMC3236818; doi:10.1136/bmjopen-2011-000254), 2011-12-06
Supplement: bmjopen-2011-000254.draft_revisions.pdf [file bmjopen-2011-000254.draft_revisions.pdf]

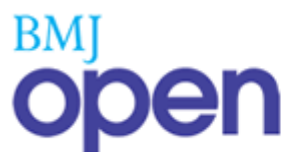

**The value of screening and intervening for intimate partner violence in South African primary care: Project evaluation**

|                                 |                                                                                                                                                   |
|---------------------------------|---------------------------------------------------------------------------------------------------------------------------------------------------|
| Journal:                        | <i>BMJ Open</i>                                                                                                                                   |
| Manuscript ID:                  | bmjopen-2011-000254                                                                                                                               |
| Article Type:                   | Research                                                                                                                                          |
| Date Submitted by the Author:   | 15-Jul-2011                                                                                                                                       |
| Complete List of Authors:       | Joyner, Kate; Stellenbosch University, Division of Nursing<br>Mash, Robert; Stellenbosch University, Division of Family Medicine and Primary Care |
| <b>Primary Subject Heading</b>: | Evidence-based practice                                                                                                                           |
| Keywords:                       | PRIMARY CARE, MENTAL HEALTH, MEDICAL EDUCATION & TRAINING                                                                                         |
|                                 |                                                                                                                                                   |

SCHOLARONE™  
Manuscripts

Peer Review Only

# The value of screening and intervening for intimate partner violence in South African primary care: Project evaluation

---

Joyner K. & Mash B.

## Abstract

### Objectives

Intimate partner violence (IPV) is an important contributor to the burden of disease in South Africa. Evidence-based approaches to IPV in primary care are lacking. This study evaluated a project that implemented a South African protocol for screening and managing IPV. This article reports on the benefits, and harms, of this intervention from the perspective of the women IPV survivors.

### Design

This was a project evaluation involving two urban and three rural primary care facilities. Over 4-8 weeks primary care providers screened all adult women for a history of IPV within the previous 24 months and offered referral to the study nurse. The study nurse assessed and managed the women according to the protocol. Researchers interviewed the women 1-month later to ascertain their adherence to the management plan and views on the intervention.

### Results

In total 168 women were managed and 124 (73.8%) returned for follow up. Emotional (139, 82.7%), physical (115, 68.5%), sexual (72, 42.9%) and financial abuse (72, 42.9%) were common and 114 (67.9%) were at high/severe risk of harm. Adherence to the management plan ranged from testing for syphilis 10/25 (40.0%) to consulting a psychiatric nurse 28/58 (48.3%) to obtaining a protection order 28/28 (100.0%). More than 75% perceived all aspects of their care as helpful, except for legal advice from a non-profit organisation.

Women reported significant benefits to their mental health, reduced alcohol abuse, improved relationships, increased self-efficacy and reduced abusive behavior. Two characteristics seemed particularly important: the style of interaction with the nurse and the comprehensive nature of the assessment.

### Conclusion

Female IPV survivors in primary care experience benefit from an empathic, comprehensive approach to assessing and managing the clinical, mental, social and legal aspects. Primary care managers should find ways to integrate this into primary care services and evaluate it further.

1  
2  
3  
4  
5  
6  
7  
8  
9  
10  
11  
12  
13  
14  
15  
16  
17  
18  
19  
20  
21  
22  
23  
24  
25  
26  
27  
28  
29  
30  
31  
32  
33  
34  
35  
36  
37  
38  
39  
40  
41  
42  
43  
44  
45  
46  
47  
48  
49  
50  
51  
52  
53  
54  
55  
56  
57  
58  
59  
60

## ARTICLE SUMMARY

### ARTICLE FOCUS

- Did women experiencing IPV find assessment and management in primary care beneficial?
- What aspects of the management plan did they adhere to?
- What aspects of the management plan did they find most helpful?

### KEY MESSAGES

- Women diagnosed with IPV in primary care perceive benefit from an intervention characterised by both empathic, non-judgmental listening and a comprehensive approach to the clinical, mental, social and legal aspects.
- Women reported benefits to their mental health, alcohol use, relationships, and experience of abusive behaviour.
- IPV survivors were most proactive about securing protection orders, laying criminal charges, and testing for pregnancy post-intervention.

### STRENGTHS AND LIMITATIONS

- A comprehensive biopsychosocial and forensic intervention in primary care was tested, securing follow-up which revealed its value.
- The study was conducted under usual working conditions and resource availability making the findings applicable to the primary care context.
- Although the study only involved five purposely selected facilities, the rural/urban mix makes it likely that these are fairly typical.
- Obsequiousness bias was reduced by different researchers conducting the follow up interviews.
- Follow up after one month is too short to predict the longer term consequences of the intervention.
- The study did not measure the effect of the intervention on the abuse, but relied on the women's perceptions and self-reports.

## Introduction

Interpersonal violence is the second highest contributor to the burden of disease after HIV and AIDS, with intimate partner violence (IPV) accounting for 62.4% of the total burden in females.[1] South African women are killed by their intimate partners more often than in most other countries.[2] IPV appears to be twice as common in rural South African settings compared to urban, with a complex interplay of racial, gender and economic forces, maintaining women in abusive situations.[3] The use of violence to maintain dominance in interpersonal relationships forms a cross-cultural cornerstone of masculinity in South Africa.[4] For these reasons, it is crucial that healthcare providers attend to IPV survivors' needs comprehensively.

South African laws and policy on violence against women acknowledge it to be a significant human rights and public health issue. South Africa's Domestic Violence Act (116 of 1998) includes a definition of domestic violence so comprehensive that marks it as a legislative standard bearer internationally.[5] An inexpensive and unsophisticated civil procedure for obtaining a protection order clearly demarcates the duties of the police.[6] Unfortunately, specific responsibilities for healthcare providers are not outlined and a gulf exists between the contents of the Act and its practical implementation.

The WHO now positions IPV as an urgent public health priority.[7] Internationally, evidence-based interventions in primary care settings are lacking.[8,9] A systematic review on screening for IPV in primary care concludes that while "domestic violence is a common problem with major health consequences for women, implementation of screening programmes cannot be justified."[10] They call for evidence of the benefit of specific interventions and lack of harm from screening.

Paradoxically, universal screening for IPV in health care settings is commonly endorsed by international guidelines.[11] However, in poorly resourced contexts such as South Africa the use of case finding, based on the presentation of specific signs or symptoms of abuse, is recommended.[12] This focuses healthcare resources and providers' time on those needing immediate healthcare.

In South African primary care, case finding is not practiced routinely and IPV remains hidden beneath other diagnoses. Health providers are mostly reluctant to ask about

1  
2 IPV and patients rarely disclose the problem spontaneously. Providers are also  
3 unsure how to manage IPV as it has complex clinical, mental, social and legal  
4 implications. They tend not to accept that IPV is a health problem and in a system  
5 already over burdened by other diseases, may be unwilling to legitimise IPV as part  
6 of their work.  
7  
8  
9

10  
11 Evaluations of initiatives addressing IPV are lacking, and frequently focus on the  
12 criminal justice system.[13] However lack of evidence should not be equated with  
13 lack of effectiveness.[14] Inquiry about IPV offers a way of “uncovering and reframing  
14 a hidden stigma” to provide benefit, even if no action follows forthwith.[15]  
15  
16  
17

18  
19 This study evaluated the implementation of a South African protocol for screening  
20 and managing women living with IPV in local primary healthcare settings.[16] This  
21 article reports on the benefits, and harms, of this intervention from the participants’  
22 perspective.  
23  
24  
25  
26

## 27 28 29 **Methods**

### 30 31 **Study design**

32  
33 Evaluation of a project in South African primary care which implemented a protocol  
34 for the recognition, assessment and management of women with IPV.  
35  
36

### 37 38 **Study setting**

39  
40 Two urban and three rural health care facilities were purposefully selected in the  
41 Western Cape. Selection was based on their willingness to participate, availability of  
42 a psychiatric nurse and a private space for the study nurse. Otherwise facilities were  
43 typical of primary care in the Western Cape. Patients in ambulatory primary care  
44 were usually seen by a nurse practitioner.  
45  
46  
47

48  
49 The two urban community health centres were situated in formerly designated “black”  
50 and “coloured” townships in Cape Town. One rural site was a community health  
51 centre in a large rural town and in a former “coloured group area”. The other two rural  
52 sites were remote, smaller clinics in farming communities. All these public sector  
53 facilities served low socio-economic groups who were not medically insured.  
54  
55  
56  
57  
58  
59  
60

## Selection of women

All primary care providers at the facilities were asked to screen all female patients, of 18 years and older, for a history of IPV during the previous 24 months. Facilities agreed to screen women for 4-8 weeks.

In-service training of the health care practitioners was given by the researchers and they were provided with a prompt tool that listed the questions, such as, "How are things going in your relationship?" or "In this clinic we ask all women patients if they have ever experienced any form of abuse. Have you ever experienced abuse by your partner?" Women identified as having experienced IPV were offered a referral to the study nurse.

## Intervention

The authors recruited and trained two nurse practitioners to provide the intervention. These study nurses, including principal author, then obtained consent and built rapport with the women before proceeding with the comprehensive assessment and management plan described below. The screening and management protocol tested in this study was developed in Cape Town by the Consortium on Violence Against Women with the help of Canadian activists.[16] The suggested assessment and management plan included the following:

- A systematic history of type and frequency of abuse.
- A comprehensive medico-legal history including previous HIV tests, sexually transmitted infections, risk of pregnancy, previous attempts to enlist assistance from police or law courts and forensic documentation of injuries. If necessary the woman was offered further testing or treatment.
- The original protocol neglected aspects of mental health. Therefore a locally adapted version of the World Health Organisation's toolkit for the recognition, diagnosis and treatment of mental disorders in primary care was added.[17] If a mental problem was suspected the participant was referred to the psychiatric nurse.
- A safety assessment tool intended to ascertain the woman's risk of serious injury. Discussion of a safety plan then followed with referral to other health, social, legal or police services.

Before leaving, women were given an appointment for a follow-up interview 1-month later.

## Data collection

Data was extracted from the record of the initial consultation to give a profile of the management plans. The intended management plan was available to the researcher at the follow up interview.

A different researcher conducted the follow-up interviews. A semi-structured questionnaire explored adherence to, and perceptions of, the care planned during the initial consultation. Participants reflected on how useful this had been, how they felt about their IPV situation now, and whether they had acted upon their intended plans. This researcher either made detailed notes or recorded key responses verbatim.

## Data analysis

The quantitative data was analysed by Stellenbosch University's Centre for Statistical Consultation in terms of simple frequency tables. The qualitative data was coded and analysed according to the framework method to understand how participants experienced the intervention.[18]

## Findings

### Profile of the women

Participants comprised 168 females with 56 (33.3%) from urban and 112 (66.6%) from rural facilities. Table I describes the frequency and range of abuse. Over the 2 years preceding this study, 96 (57%) participants admitted to being abused more than twenty times, 27(16%) between eleven and twenty times and 45 (27%) had been abused ten or less times. Each woman experienced on average eight forms of abuse over extended periods. Emotional abuse was commonest and ranged from verbal abuse, to restricted contact with family and friends, to control of the woman's freedom to pursue activities. Physical abuse came a close second, with 115 (68%) having experienced beatings, 82 (50%) kicked, and alarmingly 55 (34%) had been choked.

Table II describes their degree of risk according to the safety scores and shows that 114 (67.9%) were at high or severe risk. The fact that 77 (45.8%) believed he was capable of killing indicates the atmosphere of fear pervading the households. Apart from the danger to the woman herself, 91 (54.2%) admitted that their partners had threatened to kill their children.



### Value of different aspects of the intervention

Out of the 168 women 124 (73.8%) returned for the follow up interview. Table III shows key elements of the management plan and the extent to which women acted on these plans. Significantly, 28/28 (100%) of women followed through on applying for a protection order, 16/19 (84.2%) proceeded to lay a charge and 23/24 (95.8%) saw the social worker.

Table IV shows the perceived usefulness of different aspects of the intervention. No respondents reported the intervention as harmful. Over 75% found all elements of their suggested management plans useful, apart from referral to local non-profit organisations for legal advice.

### Therapeutic effect of empathic listening

Participants explained that telling their story and feeling understood was in itself beneficial.

“... found the intervention interesting ... felt that ... she could talk to someone and they actually heard her. She also felt that she could trust the study nurse. She described the social worker and psychiatric nurse and how they just said, ‘yes, yes’ and never really understand. The study nurse gave her advice and told her what she could do.”

Being able to be honest in a supportive and non-judgmental interaction was helpful:

“No one had ever spoken to her openly before and it was the first time she was able to be completely honest about everything. She does not want to give up on her marriage and feels it would be best if she and her husband received counselling together.”

The style of interaction was different from usual and facilitated honest reflection on the situation:

“Doctor had asked her before why she was so stressed but was too embarrassed to tell him. But she was able to talk to (the study nurse) and felt it was good to have evaluated her situation.”

### Value of clinical care



1  
2 Participants appreciated having their overall health as women taken seriously,  
3 particularly since many aspects were examined, which were not usually dealt with.  
4 Many felt relieved to be tested for HIV or assessed for sexually transmitted infections.  
5 Adherence to other ongoing clinical care, such as antiretroviral treatment, appeared  
6 to also improve:  
7  
8  
9

10  
11 “When patient first came she describes herself as tense and hysterical. While  
12 talking to the study nurse she experienced a change inside...hope...Before she  
13 met her she never thought she could reach the place she is now...(decreased  
14 CD4 count, attending ARV clinic, has gained weight).”  
15  
16  
17  
18  
19  
20  
21

## 22 **Safety Assessment and Planning**

23  
24 The safety assessment was found to be useful for the following range of reasons:  
25  
26

27 “... made her feel better after hearing that it was wrong to be forced to have sex”;  
28 “... opened her eyes as she learnt that he should not hurt her like that”;  
29 “... saw how dangerous her situation was and decided to get help (an interdict”);  
30 “... made her aware of her own faults as well”.  
31  
32  
33  
34  
35  
36

37 Participants cited many reasons why they found the safety plan useful:  
38  
39

40 “She is very afraid as feels he could kill her. Good to discuss what to do and  
41 make a plan – not tell him anything. Just leave.”  
42 “In the past always had to scramble around and look for things in an emergency  
43 but now all her things are in one place.”  
44  
45  
46  
47  
48

## 49 **Referral to other resources**

50  
51 Knowing about the available resources and being offered referral was appreciated:  
52  
53

54 “The intervention helped a lot. She did not know that there were so many people to  
55 help her. She had been to social workers before, but it is not the same. She now  
56 does not feel alone anymore.”  
57  
58  
59

60 The referral letter had helped to access services required:

1  
2 “...before “x” court had refused to help her, but with letter they gave her a protection  
3 order. Now she feels happy.”  
4

5  
6 Many participants expressed relief at discovering they have rights, and where to find  
7 help when they need it. Many expressed that the questions and information opened  
8 up a new world, linking them to resources and showing ways to change their  
9 circumstances.  
10  
11

### 12 13 **Problems with police**

14  
15 Most complaints referred to unsympathetic, impersonal, indiscreet or corrupt police.  
16  
17 One participant’s partner had paid the police off while another’s recurrently abusive  
18 behavior continued despite her protection order. Another explained when she had  
19 applied for a protection order she was not given a copy of the temporary order. When  
20 she laid a charge, she received a case number, but no copy of the statement or  
21 medical report. This was failure of authorities to provide copies was commonly  
22 reported by participants.  
23  
24  
25  
26  
27  
28  
29

### 30 31 **Negative reactions to the intervention**

32  
33 Digging up the past had upset a participant. Another complained that she felt very  
34 frightened after the interview. One said that things were worse at home because  
35 when informed of the pending divorce, he threatened to take the children and jump  
36 under a train.  
37  
38  
39

### 40 41 **Suggestions to improve the help offered**

42  
43 A strong theme was the need for a support group:  
44

45  
46 “She would like to talk to other women who have been through the same situations.  
47 She would like to make friends and learn from other people.”  
48  
49

50  
51 A professional rural woman desired referral to services outside her community as she  
52 felt too exposed to access services within it. Another would only see a female  
53 counsellor. Some wanted their partner to be “spoken to” or couple counselling to  
54 prevent the impression that only women need help. Some resented a perceived onus  
55 on women to resolve problems rather than zero tolerance for men’s abusive  
56 behaviour and proactive efforts to get functional interventions in place. Other  
57 participants requested practical assistance such as written advice or help with  
58  
59  
60

1  
2 completing protection order application. One woman expressed a need for solitude  
3 and space to reflect.  
4  
5

## 6 7 8 **Impact of the intervention on the women and their situations** 9

### 10 11 **Improved mental state** 12

13 Multiple participants reported improved mood, sociability and sense of well-being as  
14 well as decreased anxiety, suicidal ideation and alcohol abuse. Enhanced parenting  
15 emerged frequently as a theme.  
16  
17

18  
19  
20 “I used to feel sad all the time. I used to feel useless but now I feel responsible. I can  
21 take care of my children now. When I was drinking every day I would take them to a  
22 woman to look after them. Now I enjoy my kids and my life more ... since I went to  
23 press charges we have not been together and he has not hurt me either.”  
24  
25

26  
27  
28 “I was a wreck, but when I left her office I could face the world squarely again. She  
29 taught me things about myself I did not know. My problems were not solved then and  
30 there but I can now notice what I did not before and I feel better about myself as a  
31 person.”  
32  
33

### 34 35 **Reduced isolation** 36

37  
38 Some participants found that the intervention encouraged them to reduce their  
39 isolation by reconnecting with trustworthy friends or family members in a more open  
40 and honest way:  
41  
42

43  
44 “Communication ... has improved. It is easier for her to disagree and she feels more  
45 independent, like she could manage without him. She had isolated herself quite a bit,  
46 but is now starting to reach out to her friends again.”  
47  
48

### 49 50 51 **More aware of their rights** 52

53 Women described no longer “feeling lost” since they learnt about potentially helpful  
54 resources:  
55  
56

57  
58 “For the first time in two years, she phoned the police and used her protection order.  
59 She appeared in front of the magistrate and since then he has lived with his family.”  
60

1  
2 Many discussed a notable improvement in the partners' behaviour in response to a  
3 letter the researcher had written to the police and/or magistrates' court. Women  
4 reported that obtaining a protection order from the court was more effective than  
5 laying a charge at the police station. In most cases where the criminal justice system  
6 was effectively engaged the abusive behaviour stopped completely, usually due to  
7 fear of jail.  
8  
9

### 10 11 12 13 **Taking action**

14  
15  
16 On follow-up, some reported having taken action to enhance the quality of their lives.

17  
18  
19 "...after interview she got a protection order and ended her relationship with her  
20 gangster boyfriend who uses tic" (metamphetamine)."  
21

### 22 23 **Improved relationships**

24  
25  
26 Many participants described improvement in their family relationships:

27  
28 "I went to a support group for abused women. A lot changed inside myself, like now I  
29 know how to talk to my husband. I was always angry and shouting at him, now we  
30 communicate better. I am much kinder to the kids. I feel happy now. Before I felt sad,  
31 wanted to cry and stay alone."  
32  
33

34  
35  
36 "Before I met the researcher, I always felt alone. Secondly when I'm talking to my  
37 kids I'm always fighting because I think I am somebody useless. After I talk with her I  
38 do not fight so much. I try not to be aggressive. I try to sit down and talk with my  
39 children. At least they listen to me – they appreciate me being kind. Also, I have  
40 stopped shouting at my baby, now 18 months, because I love her so much and show  
41 her that in a kind way ... the last three weeks I feel more normal, like myself."  
42  
43  
44  
45  
46  
47

### 48 **Change in own behaviour**

49  
50  
51 Many participants described how the intervention had motivated change in their own  
52 behavior. Reduced alcohol abuse was a particularly frequent effect, with enhanced  
53 parenting an attendant theme.  
54

55  
56  
57 "Our relationship is going much better than before. I discussed certain things with him  
58 and he understood me. I am drinking much less than before and going to evening  
59 songs again. I never wanted to work on Saturdays but now I am".  
60

1  
2 “It made her realise that she can no longer continue to use alcohol because it’s  
3 detrimental to her baby. She feels she can talk about things easier and that she  
4 came out a stronger person, able to take a stand.”  
5  
6  
7

8 “Yes, I am different inside. When he tries to provoke me with verbal abuse when  
9 drunk, I don’t allow him to make me angry. He doesn’t even listen to me, but I take  
10 me seriously.”  
11  
12

### 13 **Change in partners’ behaviour**

14  
15  
16 Change in partners’ behaviour was also reported:  
17

18  
19 “There has been great change in her life. The intervention was very useful because  
20 the results have made her feel very happy. The situation at home has improved very  
21 much. Her husband has even been working in their garden and helping the children  
22 with homework - never before.”  
23  
24  
25  
26

27  
28 “She found the whole experience useful because she got a protection order and  
29 there is now someone to stop him. Even though he was famous for his actions locally  
30 and people were aware of his behaviour, nothing was ever done. The protection  
31 order however has changed his behaviour.”  
32  
33  
34

### 35 **No real change**

36  
37 Some participants reported that the process had been useful, even though neither his  
38 behaviour nor her circumstances had altered. A few participants found no  
39 improvement or only felt better temporarily. The intractable challenges that pervaded  
40 these responses often involved alcoholism in either or both partners, financial  
41 constraints, HIV infection as well as participants’ inertia to follow up on referrals  
42 made.  
43  
44  
45  
46  
47

48  
49 “No real change – he continues to withhold pay while expecting money from her with  
50 which to buy alcohol. Locked her and kids out of home while he was away drinking,  
51 very abusive on return. She wants a divorce.”  
52  
53  
54

55 A common refrain was, “When he is not drunk, he is such a nice guy.”  
56

57  
58 Another trap was expressed as follows:  
59  
60

1  
2 “She needs the money that he provides ... a protection order will make him angry  
3 and he will not be able to work if he is in jail. She is still very scared of him but he  
4 gets angry if she addresses his behavior. He must always be right.”  
5  
6  
7

## 8 Discussion

9  
10 Women were suffering simultaneously from multiple types of abuse and were mostly  
11 at high or severe risk of injury and death. Women showed strong adherence to the  
12 components of the management plan and described all aspects of the intervention as  
13 helpful. Women reported significant benefits to their mental health, reduced alcohol  
14 abuse, improved relationships, increased self-efficacy and reduced abusive behavior.  
15  
16  
17  
18

19 Two characteristics of the intervention appeared particularly important: the style of  
20 interaction with the nurse and the comprehensive nature of the assessment.  
21  
22  
23  
24

25 Being encouraged to tell their story and being listened to with genuine interest and  
26 care emerged as key features of the interview which participants valued. This echoes  
27 other studies which speak of IPV survivors' need for compassionate, uninterrupted  
28 listening.[19,20] Clearly indicating to patients that violence is not a taboo topic, is in  
29 itself a vital therapeutic component of any intervention.[21] The safety assessment  
30 provided feedback on how the situation is perceived relative to a different norm, thus  
31 enhancing the discrepancy between 'normalcy' and their current situation. Our  
32 findings of the significance of empathic, non-judgmental interaction is  
33 supported.[22,23,24]  
34  
35  
36  
37  
38  
39  
40  
41

42 This study addresses a key gap in the literature since it provides evidence of the  
43 benefits of a comprehensive intervention for IPV.[8,9,10] In order to be  
44 comprehensive, assessment and management should include clinical, psychological,  
45 social, legal and advocacy components. Clinical aspects include the risk of  
46 pregnancy, sexually transmitted infections and HIV testing. Psychological aspects  
47 include identifying potential mental health problems. Social includes possible referral  
48 to support groups, social workers and safety planning. Legal includes referral for a  
49 protection order, which was found more effective than laying a criminal charge.  
50 Information about rights and local resources was important.  
51  
52  
53  
54  
55  
56  
57  
58

59 Advocacy and referral to relevant resources has the potential to interrupt and prevent  
60 recurrent IPV and associated trauma while enhancing IPV survivors' quality of life.[8]  
Six months of advocacy has been found to improve emotional health, personal

1  
2 safety, health care and the ability to get medication or treatment while decreasing  
3 unhealthy coping behaviours.[25]  
4

5  
6 The intervention occasionally led to separation, but more often to improvement in the  
7 relationship with the partner. Contrary to popular belief, most IPV survivors want the  
8 violence, not the relationship, to end.[26]  
9  
10

### 11 12 **Strengths and limitations**

13 The mixed methods facilitated in depth understanding of how women experienced  
14 the intervention. Follow up however was limited to 1-month so the study cannot  
15 determine if changes were sustained or if additional changes occurred subsequently.  
16 A longitudinal evaluation measuring the effect of the intervention on the abuse could  
17 provide further evidence of effectiveness. Fewer women than expected were  
18 identified and referred to the study and the issues related to screening are presented  
19 elsewhere.[12]  
20  
21  
22  
23  
24  
25  
26

### 27 **Implications and recommendation**

28 The study provides evidence that the intervention was perceived as useful by most  
29 participants. Implementation in primary care will require attention to enabling an  
30 empathic communication style and a comprehensive assessment and management  
31 plan. A proposed model of how the intervention can be integrated into local primary  
32 care is described elsewhere.[27] The evaluation of this protocol has provided  
33 sufficient evidence to the Department of Health to implement the model in the  
34 Western Cape.  
35  
36  
37  
38  
39  
40  
41

42 The communication style mirrors that of motivational interviewing which helps people  
43 make difficult decisions about behavior change.[28] Characterised by empathy, clear  
44 direction, collaboration, evocation of the client's perspective and solutions, its  
45 approach respects autonomy. Training in motivational interviewing as well as the  
46 conceptualisation of IPV as a chronic rather than an acute condition should be  
47 considered in the roll-out of this model.  
48  
49  
50  
51  
52

### 53 **Conclusion**

54 Women diagnosed with IPV in primary care perceive clear benefit, at least in the  
55 short term, from an intervention characterised by both empathic, non-judgmental  
56 listening and a comprehensive approach to assessing and managing the clinical,  
57  
58  
59  
60



1  
2 mental, social and legal aspects. District managers should integrate this approach  
3  
4 into primary care services and evaluate it further.  
5  
6

## 7 8 Reference List

- 9 1. Norman R, Bradshaw D, Schneider M, et al. Estimating the burden of disease  
10 attributable to interpersonal violence in South Africa in 2000. *S Afr Med J*  
11 2007;97(8):653-656.  
12
- 13 2. Abrahams N, Jewkes R, Martin L, et al. Mortality of Women From Intimate  
14 Partner Violence in South Africa: A National Epidemiological Study. *Violence*  
15 *Vict* 2009;24(4):546-556.  
16
- 17 3. De Villiers P. Home Violence in South Africa: Surveillance during 1996 by  
18 SASPREN, a Sentinel Network of general/family practitioners. *SASPREN*  
19 *News* 1998 September/October;87-89.  
20
- 21 4. Morrell R, editor. *Changing men in Southern Africa*. Pietermaritzburg:  
22 University of Natal Press; 2001.  
23
- 24 5. Domestic Violence Act 116 of 1998 [Online] [s.a.] [access 2011, July 11];  
25 Available: <http://search.sabinet.co.za.ez.sun.ac.za/WebZ/FETCH?sessionid=01-59109-916469183&recno=5&resultset=1&format=F&next=html/t2/full.html&bad=html/t2/error/badfetch.html&&entitytoprecno=5&entitycurrecno=5>  
26  
27  
28
- 29 6. Jewkes R. Reflections on Gender Violence in the South African Public Health  
30 Agenda. *Development* 2001;44(3):64-68.  
31
- 32 7. Garcia-Moreno C, Jansen HAFM, Ellsberg M, et al. World Health  
33 Organization's multi-country study on women's health and domestic violence:  
34 initial results on prevalence, health outcomes and women's responses.  
35 Geneva: World Health Organization Press; 2005.  
36
- 37 8. McFarlane JM, Goff JY, O'Brien JA, et al. Secondary Prevention of Intimate  
38 Partner Violence: A Randomized Controlled Trial. *Nurs Research*  
39 2006;55(1):52-61.  
40
- 41 9. Wathen CN, MacMillan HL. Interventions for Violence Against Women:  
42 Scientific Review. *JAMA* 2003;289(5):589-600.  
43
- 44 10. Ramsay J, Richardson J, Carter YH, et al. Should health professional screen  
45 women for domestic violence? Systematic review. *Br Med J* 2002;325:1-  
46 13,1419.  
47
- 48 11. Cherniak D, Grant L, Mason R, et al. Intimate Partner Violence Consensus  
49 Statement. *J Obstet Gynaecol Can* 2005;27(4):365-418.  
50  
51  
52  
53  
54  
55  
56  
57  
58  
59  
60

- 1  
2  
3  
4  
5  
6  
7  
8  
9  
10  
11  
12  
13  
14  
15  
16  
17  
18  
19  
20  
21  
22  
23  
24  
25  
26  
27  
28  
29  
30  
31  
32  
33  
34  
35  
36  
37  
38  
39  
40  
41  
42  
43  
44  
45  
46  
47  
48  
49  
50  
51  
52  
53  
54  
55  
56  
57  
58  
59  
60
12. Joyner K. Health Care for Intimate Partner Violence: Current Standard of Care and Development of Protocol Management. [unpublished dissertation]. Stellenbosch: Stellenbosch University; 2009.
13. Janssen P, Daschal-Weichhendler H, McGregor M. Assessment for Intimate Partner Violence: Where do we stand? *J Am Board Fam Med* 2006;19(4):413-415.
14. Jewkes R. Preventing domestic violence. *Br Med J* 2002;324:253-254.
15. Bradley F, Smith M, Long J, et al. Reported frequency of domestic violence: cross sectional survey of women attending general practice. *Br Med J* 2002;324:274-278.
16. Martin LJ, Jacobs T. Screening for Domestic Violence: A Policy and Management Framework for the Health Sector. Cape Town: Institute of Criminology, University of Cape Town; 2003.
17. Mash B. The development of distance education for general practitioners on common mental disorders through participatory action research. [unpublished dissertation] Stellenbosch: Stellenbosch University; 2002.
18. Ritchie J, Spencer L. Qualitative data analysis for applied policy research. In Bryman A, Burgess R, editors. *Analysing qualitative data*. London: Routledge; 1993. pp. 173-194.
19. Limandri B. The Therapeutic Relationship With Abused Women: Nurses' Responses that Facilitate or Inhibit Change. *J Psychosoc Nurs Ment Health Serv* 1987;25(2):9-16.
20. Bauer HM, Rodriguez MA. Letting Compassion Open the Door: Battered Women's Disclosure to Medical Providers. *Camb Q Healthc Ethics* 1995;4:459-465.
21. Chescheir N. Violence Against Women: Response From Clinicians. *Ann Emerg Med* 1996;27(6):766-768.
22. Rhodes KV, Frankel RM, Levinthal N, et al. "You're not a Victim of Domestic Violence, Are You?" Provider-Patient Communication about Domestic Violence. *Ann Int Med* 2007;147:620-627.
23. Duxbury F. Recognising domestic violence in clinical practice using the diagnoses of posttraumatic stress disorder, depression and low self-esteem. *Br J Gen Pract* 2006;56:294-300.
24. Stenius VJK, Veysey BM. "It's the Little Things": Women, Trauma and Strategies for Healing. *J Interpers Viol* 2005;20:1155-1174.

- 1  
2  
3  
4  
5  
6  
7  
8  
9  
10  
11  
12  
13  
14  
15  
16  
17  
18  
19  
20  
21  
22  
23  
24  
25  
26  
27  
28  
29  
30  
31  
32  
33  
34  
35  
36  
37  
38  
39  
40  
41  
42  
43  
44  
45  
46  
47  
48  
49  
50  
51  
52  
53  
54  
55  
56  
57  
58  
59  
60
25. Hathaway JE, Zimmer B, Willis G, et al. Perceived Changes in Health and Safety Following Participation in a Health Care-Based Domestic Violence Program. *J Midwifery Womens Health* 2008;53(6):547-555.
26. Mathews S, Abrahams, N. Combining Stories and Numbers: An Analysis of the Impact of the Domestic Violence Act (No. 116 of 1998) on Women. Tygerberg: The Gender Advocacy Programme and The Medical Research Council; 2001.
27. Joyner K & Mash B. How to provide comprehensive, appropriate care for survivors of intimate partner violence. In Joyner K, editor. *Aspects of Forensic Medicine: An Introduction for Healthcare Professionals*. Cape Town: Juta; 2010. pp. 87-100.
28. Miller, W. & Rollnick, S. *Motivational Interviewing: Preparing People for Change*. New York: The Guilford Press; 2002.

**Table I: Prevalence of different types of abuse**

| <b>Abuse behavior</b>           | <b>n = 168</b> | <b>%</b> |
|---------------------------------|----------------|----------|
| <b>Emotional</b>                |                |          |
| Shouting                        | 139            | 82.7     |
| Name calling                    | 136            | 81.0     |
| Threatening                     | 94             | 56.0     |
| Restricting contact             | 84             | 50.0     |
| Controlling activities          | 63             | 37.5     |
| Accusations                     | 19             | 11.3     |
| Other                           | 16             | 9.5      |
| <b>Physical</b>                 |                |          |
| Hit                             | 115            | 68.5     |
| Pushed                          | 90             | 53.6     |
| Kicked                          | 82             | 48.8     |
| Use of weapon                   | 69             | 41.1     |
| Choked                          | 57             | 33.9     |
| Burnt                           | 8              | 4.8      |
| Hair pulled                     | 2              | 1.2      |
| <b>Sexual</b>                   |                |          |
| Infidelity                      | 72             | 42.9     |
| Sexual coercion                 | 55             | 32.7     |
| Unwanted touching               | 41             | 24.4     |
| Sexually transmitted infections | 41             | 24.4     |
| Other                           | 6              | 3.6      |

**Table I: Prevalence of different types of abuse**

| <b>Financial</b>                              |              |      |
|-----------------------------------------------|--------------|------|
| Withholding money                             | 72           | 42.9 |
| Controlling decisions                         | 25           | 14.9 |
| Taking money                                  | 23           | 13.7 |
| Other                                         | 6            | 3.6  |
| <b>Total reports of an incidence of abuse</b> | <b>1 315</b> |      |

**Table II: Safety assessment score**

|                                          | n = 168 | %    |
|------------------------------------------|---------|------|
| <b>Safety assessment score</b>           |         |      |
| Not done                                 | 3       | 1.8  |
| Caution (0–3)                            | 50      | 29.8 |
| High risk (4–7)                          | 87      | 51.8 |
| Severe risk (8–11)                       | 27      | 16.1 |
| <b>Safety assessment fields</b>          |         |      |
| Threatened with physical violence?       | 125     | 74.4 |
| Threatened children with violence?       | 109     | 64.9 |
| Firearm in house?                        | 102     | 60.7 |
| Made a death threat?                     | 92      | 54.8 |
| Threatened to kill children?             | 91      | 54.2 |
| Capable of killing?                      | 77      | 45.8 |
| Substance use prior to last abuse?       | 62      | 36.9 |
| Police intervention necessary?           | 54      | 32.1 |
| Is he in the house?                      | 41      | 24.4 |
| Has abuse escalated in severity?         | 35      | 20.8 |
| Received medical treatment for injuries? | 33      | 19.6 |

**Table III: Adherence of women to plans made by 1-month follow up (N=124)**

|                                      | Management plan |      | Action |      | Adherence |
|--------------------------------------|-----------------|------|--------|------|-----------|
|                                      | N               | %    | n      | %    | n/N %     |
| Wants HIV test                       | 56              | 45.2 | 31     | 25.0 | 55.4      |
| Wants rapid plasma reagin test       | 25              | 20.2 | 10     | 8.1  | 40.0      |
| Wants pregnancy test                 | 6               | 4.8  | 10     | 8.1  | 100.0     |
| Intends to obtain a protection order | 28              | 22.6 | 28     | 22.6 | 100.0     |
| Intends to lay a charge              | 19              | 15.3 | 16     | 12.9 | 84.2      |
| Referral to NPO for legal support    | 15              | 12.1 | 7      | 5.6  | 46.7      |
| Referral to NPO counselling          | 32              | 25.8 | 12     | 9.7  | 37.5      |
| Referral to psychiatric nurse        | 58              | 46.8 | 28     | 22.6 | 48.3      |
| Referral to social worker            | 24              | 19.4 | 23     | 18.5 | 95.8      |

NPO=Non profit organisation



**Table IV Perceived usefulness of different aspects of the intervention**

| Intervention                  | N   | Very helpful |      | Helpful |      | Unhelpful |      | Don't know |      |
|-------------------------------|-----|--------------|------|---------|------|-----------|------|------------|------|
|                               |     | n            | %    | n       | %    | n         | %    | n          | %    |
| Safety assessment             | 106 | 31           | 29.2 | 54      | 50.9 | 6         | 5.7  | 15         | 14.2 |
| Safety plan                   | 102 | 33           | 32.4 | 44      | 43.1 | 9         | 8.8  | 16         | 15.7 |
| Protection order              | 28  | 14           | 50.0 | 9       | 32.1 | 4         | 14.3 | 1          | 3.6  |
| Going to NPO for legal advice | 7   | 2            | 28.6 | 2       | 28.6 | 1         | 14.3 | 2          | 28.6 |
| Going to NPO for counselling  | 12  | 5            | 41.7 | 4       | 33.3 | 1         | 8.3  | 2          | 16.7 |
| Going to psychiatric nurse    | 28  | 13           | 46.4 | 13      | 46.4 | 2         | 7.1  | 0          | 0.0  |
| Going to social worker        | 23  | 6            | 26.1 | 10      | 43.5 | 3         | 13.0 | 4          | 17.4 |
| Laying criminal charge        | 16  | 5            | 31.3 | 10      | 62.5 | 1         | 6.3  | 0          | 0.0  |

NPO=Non profit organisation

#### **Acknowledgements:**

Thanks are due first and foremost to all the IPV survivors, health care providers, health system managers, key informants, co-researchers, supervisors and referral resources who participated in this study, thereby making it possible. Thanks also to Julia Blitz for her critical review

#### **Competing Interests:**

The authors declare no conflict of interests.

#### **Funding:**

This work was supported by two National Research Foundation Thuthuka grants (TTK2006052200003 & TTK2005072900031) and two Harry and Doris Crossley awards from Stellenbosch University.

#### **Contributor Statement**

Conception and design: K Joyner and R Mash

1  
2 Data collection: K Joyner, N Bakumeni, M Abrahams, L Le Roux, K Thomson  
3 Analysis of the data: K Joyner, M Kidd (statistician)  
4 Interpretation of the data: K Joyner, R Mash  
5 Drafting of the article: K Joyner and R Mash  
6 Critical revision of the article for important intellectual content: K Joyner, R Mash and  
7 J Blitz  
8  
9 Final approval of the article: K Joyner and R Mash  
10  
11  
12  
13  
14  
15  
16  
17  
18  
19  
20  
21  
22  
23  
24  
25  
26  
27  
28  
29  
30  
31  
32  
33  
34  
35  
36  
37  
38  
39  
40  
41  
42  
43  
44  
45  
46  
47  
48  
49  
50  
51  
52  
53  
54  
55  
56  
57  
58  
59  
60

For peer review only

## COREQ 32-ITEM CHECKLIST (Tong, Sainsbury & Craig, 2007)

### Domain 1: Research team and reflexivity

#### Personal characteristics

##### 1. Interviewer/Facilitator

Kate Joyner: conducted first and follow-up interviews and focus groups

##### 2. Credentials *M.Soc. Sc; Advanced Diploma in Psychiatric Nursing; Diploma in General, Community and Psychiatric Nursing and Midwifery.*

##### 3. Occupation Programme coordinator: Mental Health and Gender-Based Violence Nursing, StellenboschUniversity; doctoral student.

##### 4. Gender Female

##### 5. Research experience

Conceptualised and supervised a student project which subsequently won the DumoBaqwa award for best original research article in South African Journal of Family Practice 2007: Joyner K. et al. Emergency care provision for, and psychological distress in, survivors of domestic violence. SA FamPract 2007;49(3).

##### Training

Active in the NGO sector since 1985

Three social science degrees at UCT, was busy doing a doctorate in Social Science Research Methodology.

Seven years of integrating how to provide care for those affected by gender-based violence into all undergraduate, postgraduate and non-degree purpose training at Stellenbosch University.

Organised and participated in all cooperative inquiry group meetings.

##### 1. Facilitator

Robert Mash: conducted a focus group, and facilitated all cooperative inquiry group meetings

##### 2. Credentials *PhD; MBChB; MRCGP; DCH; CRCOG*

##### 3. Occupation Assoc. Professor in Family Medicine and Primary Care, StellenboschUniversity

##### 4. Gender Male

##### 5. Research experience and training Research projects currently focus on chronic diseases (diabetes, asthma), training of family physicians; defining

family medicine in Sub-Saharan Africa, motivational interviewing, a survey for reasons for encounter and diagnoses in South African primary care.

Supervisor of 30 Masters and 7 Doctoral students at Stellenbosch University.

### 1. Interviewer/Facilitator

Maggie Abrahams: conducted first and follow up interviews and a focus group

### 2. Credentials *Diploma in Community Health Science and*

*Administration, Registration as Midwife and Psychiatric Professional Nurse*

### 3. Occupation Research assistant/study nurse; Masters student.

### 4. Gender Female

### 5. Experience No former research experience, three decades of nursing experience in the clinical field.

**Training** Three day training before beginning data collection and participated in five cooperative inquiry group meetings.

### 1. Interviewer

Nobuhle Bakumeni: conducted first interviews

### 2. Credentials *Diploma in General Nursing Science and Midwifery; Certificate in Advanced Health Management Programme*

### 3. Occupation Nurse clinician at HIV/ARV clinics in Eastern Cape; Masters student.

### 4. Gender Female

### 5. Research experience Worked as research assistant and facilitator to improve water sanitation in East London for 9 months on a Water Commission research project.

**Training** Two day training before beginning data collection and one cooperative inquiry group meeting during her involvement in the research process. Principal author also met with Nobuhle twice a week during data collection process to provide supervision (support).

### 1. Interviewer

Liezel Le Roux: conducted follow-up interviews

**2. Credentials** *B Cur; Registration as General, Community and Psychiatric Professional Nurse and Midwife*

**3. Occupation** Research assistant at Medical Research Council's Unit for Anxiety and Stress Disorders.

**4. Gender** Female

**5. Research experience**

Student research project supervised by Joyner and subsequent employment as research assistant, see occupation above.

#### **Training**

Two day training before data collection began.

**1. Interviewer**

Kirsten Thomson: conducted follow-up interviews

**2. Credentials** *Bachelor of Arts*

**3. Occupation** Research assistant; Honours degree in History student

**4. Gender** Female

**5. Research experience**

Kirsten was working as a research assistant on the Groote Schuur History project. She had participated in 19 interviews and was coordinating the study.

**Training** Training discussions in meetings with Kate, and participated in three cooperative inquiry group meetings.

### **Relationship with participants**

**6. Relationship established**

Most participants had no prior relationship with interviewers, except in case of Maggie Abrahams who was the full time study nurse in the region she had grown up in.

**7. Participant knowledge of the interviewer**

Participants were informed that she was the study nurse, and that her role was to provide comprehensive assistance to them. Participants were informed that the role of the follow-up interviewer was to understand whether the intervention (1<sup>st</sup> interview) had been of use to them.

## 8. Interviewer characteristics

Participants only had positive things to say about all interviewers. Their experience of the intervention was surprisingly satisfactory – perhaps due to the historical and continuing neglect of intimate partner violence as a legitimate, important health concern.

Significantly also, all first interviewers had left or were living in abusive relationships. Out of 11 potential interviewers, these three committed to participating in the project and from participant's feedback it is clear that their approach was a non-judgmental one of insight, compassion and respect .

## Domain 2: study design

### Theoretical framework

#### 9. Methodological orientation and Theory

Professional action research framework for a mixed method intervention study

### Participant selection

**10. Sampling** 168 participants choose to participate in the intervention

**11. Method of approach** Female patients, 18 and older, were screened during their healthcare consultation

**12. Sample size** 168 women, 18 and older.

**13. Non-participation** No idea because it wasn't a feature of the methodology

### Setting

**14. Setting of data collection** Primary health care facilities (CHCs)

1  
2  
3  
4 **15. Presence of non-participants** Occasionally the participant's child was  
5 present.  
6

7  
8 **16. Description of sample** The sample consisted primarily of poor, relatively  
9 uneducated, African women and women of mixed origin.  
10

## 11 **Data Collection**

### 12 **17. Interview guide**

13  
14  
15  
16 The first interview involved piloting a protocol for the screening and  
17 management of intimate partner violence (Martin L, Jacobs T. Screening for  
18 Domestic Violence: A Policy and Management Framework for the Health  
19 Sector. Cape Town: Institute of Criminology, University of Cape Town, 2003. ).  
20 Professional action research methodology enabled us to modify it for use in  
21 the primary health care sector.  
22  
23

24  
25 The research team compiled the follow-up interview tool to assess  
26 participant's experience of the intervention and what action they had  
27 subsequently taken to address the care plan she had formulated with the  
28 study nurse/researcher.  
29  
30

### 31 **18. Repeat interviews**

32  
33  
34  
35 Nil  
36  
37

### 38 **19. Audio/visual recording**

39  
40  
41 Focus groups were audio recorded with a digital device.  
42  
43

44 First and follow-up interviews were manually transcribed.  
45  
46

### 47 **20. Field notes**

48  
49  
50 Field notes were made and analysed as part of the bigger study.  
51  
52

### 53 **21. Duration**

54  
55  
56 First interview (intervention): 60 – 90 minutes  
57

58 Follow-up interview: 30 minutes  
59

60 Focus groups: 60 minutes



**22. Data saturation**

Yes, discussed in supervision with Prof Mash and cooperative inquiry group meetings.

**23. Transcripts returned**

No

**Domain 3: analysis and findings****24. Number of data coders**

Coded by principal author and verified by three co-researchers.

**25. Description of the coding tree**

Evident from results

**26. Derivation of themes**

Derived from the data

**27. Software**

SPSS for quantitative data

Manual coding of qualitative data according to Framework Method.

**28. Participant checking**

Yes, that was the purpose of the follow-up interview and is reported on in the article submitted.

**Reporting****29. Quotations presented**

Multiple participants' quotations are presented to illustrate themes.

**30. Data and findings consistent**

1  
2 Yes  
3  
4  
5

6 **31. Clarity of major themes**  
7

8 Yes, major themes are clearly presented in the findings.  
9  
10

11  
12  
13 **32. Clarity of minor themes**  
14

15 Yes, there is a discussion of minor themes  
16  
17  
18  
19  
20  
21  
22  
23  
24  
25  
26  
27  
28  
29  
30  
31  
32  
33  
34  
35  
36  
37  
38  
39  
40  
41  
42  
43  
44  
45  
46  
47  
48  
49  
50  
51  
52  
53  
54  
55  
56  
57  
58  
59  
60

For peer review only



**The value of intervening for intimate partner violence in South African primary care: Project evaluation**

|                                 |                                                                                                                                                   |
|---------------------------------|---------------------------------------------------------------------------------------------------------------------------------------------------|
| Journal:                        | <i>BMJ Open</i>                                                                                                                                   |
| Manuscript ID:                  | bmjopen-2011-000254.R1                                                                                                                            |
| Article Type:                   | Research                                                                                                                                          |
| Date Submitted by the Author:   | 02-Sep-2011                                                                                                                                       |
| Complete List of Authors:       | Joyner, Kate; Stellenbosch University, Division of Nursing<br>Mash, Robert; Stellenbosch University, Division of Family Medicine and Primary Care |
| <b>Primary Subject Heading</b>: | Evidence-based practice                                                                                                                           |
| Keywords:                       | MEDICAL EDUCATION & TRAINING, PRIMARY CARE, MENTAL HEALTH                                                                                         |
|                                 |                                                                                                                                                   |

SCHOLARONE™  
Manuscripts

Peer Review Only

# The value of intervening for intimate partner violence in South African primary care: Project evaluation

Deleted: screening and

## Abstract

Deleted: oyner K. & Mash B.

### Objectives

Intimate partner violence (IPV) is an important contributor to the burden of disease in South Africa. Evidence-based approaches to IPV in primary care are lacking. This study evaluated a project that implemented a South African protocol for screening and managing IPV. This article reports primarily on the benefits of this intervention from the perspective of the women IPV survivors.

Deleted: , and harms,

### Design

This was a project evaluation involving two urban and three rural primary care facilities. Over 4-8 weeks primary care providers screened adult women for a history of IPV within the previous 24 months and offered referral to the study nurse. The study nurse assessed and managed the women according to the protocol.

Deleted: all

Researchers interviewed the participants, 1-month later to ascertain adherence to their care plan and their views on the intervention.

Deleted: women

Deleted: their

Deleted: management

### Results

In total 168 women were assisted and 124 (73.8%) returned for follow up. Emotional (139, 82.7%), physical (115, 68.5%), sexual (72, 42.9%) and financial abuse (72, 42.9%) were common and 114 (67.9%) were at high/severe risk of harm. Adherence to the management plan ranged from testing for syphilis 10/25 (40.0%) to consulting a psychiatric nurse 28/58 (48.3%) to obtaining a protection order 28/28 (100.0%). Over, 75% perceived all aspects of their care as helpful.

Deleted: manag

Deleted: More than

Deleted: , except

Deleted: for legal advice from a non-profit organisation

Women reported significant benefits to their mental health, reduced alcohol abuse, improved relationships, increased self-efficacy and reduced abusive behavior. Two characteristics seemed particularly important: the style of interaction with the nurse and the comprehensive nature of the assessment.

### Conclusion

Female IPV survivors in primary care experience benefit from an empathic, comprehensive approach to assessing and assisting with the clinical, mental, social and legal aspects. Primary care managers should find ways to integrate this into primary care services and evaluate it further.

Deleted: manag

## ARTICLE SUMMARY

## ARTICLE FOCUS

- Did women experiencing IPV find assessment and management in primary care beneficial?
- What aspects of their care plan did they adhere to?
- What aspects of their care plan did they find most helpful?

Deleted: management

Deleted: management

## KEY MESSAGES

- Women diagnosed with IPV in primary care perceive benefit from an intervention characterised by both empathic, non-judgmental listening and a comprehensive approach to the clinical, mental, social and legal aspects.
- Women reported benefits to their mental health, alcohol use, relationships, and experience of abusive behaviour.
- IPV survivors were most proactive about securing protection orders, laying criminal charges, and testing for pregnancy post-intervention.

## STRENGTHS AND LIMITATIONS

- A comprehensive biopsychosocial and forensic intervention in primary care was tested, securing follow-up which revealed its value.
- The study was conducted under usual working conditions and resource availability making the findings applicable to the primary care context.
- Although the study only involved five purposely selected facilities, the rural/urban mix makes it likely that these are fairly typical.
- Obsequiousness bias was reduced by different researchers conducting the follow up interviews.
- Follow up after one month is too short to predict the longer term consequences of the intervention.
- The study measured the effect of the intervention on the abuse indirectly via participants' self-reports.

Deleted: did not

Deleted: , but relied on

Deleted: the women's perceptions and

## Introduction

Interpersonal violence is the second highest contributor to the burden of disease after HIV and AIDS, with intimate partner violence (IPV) accounting for 62.4% of the total burden in females.[1] South Africa's intimate femicide rate is the highest globally.[2] IPV appears to be twice as common in rural South African settings compared to urban, with a complex interplay of racial, gender and economic forces, maintaining women in abusive situations.[3] The use of violence to maintain dominance in interpersonal relationships forms a cross-cultural cornerstone of masculinity in South Africa.[4] For these reasons, it is crucial that healthcare providers attend to IPV survivors' needs comprehensively.

Gender-based violence is an umbrella term for forms of interpersonal violence characterised by gendered power imbalances. Fitting within this, IPV refers to emotional, physical, sexual or financial abuse between intimates. It also fits within broader sub-categories of gender-based violence, namely family and domestic violence.

South African laws and policy on violence against women acknowledge it to be a significant human rights and public health issue yet extreme levels of gender-based violence, poverty and HIV infection among women reveal a chasm between the daily lives of female citizens and apparent gains in the public sphere.[5] South Africa's Domestic Violence Act (116 of 1998) includes a definition of domestic violence so comprehensive, it is a legislative standard bearer internationally.[6] An inexpensive and unsophisticated civil procedure for obtaining a protection order clearly demarcates the duties of the police.[7] Unfortunately, specific responsibilities for healthcare providers are not outlined and a gulf exists between the contents of the Act and its practical implementation.

The World Health Organization (WHO) now positions IPV as an urgent public health priority.[8] Internationally, evidence-based interventions in primary care settings are lacking.[9,10] A systematic review on screening for IPV in primary care concludes that while "domestic violence is a common problem with major health consequences for women, implementation of screening programmes cannot be justified." [11] They

Deleted: n

Deleted: women are killed by their intimate partners more often than in most other countries

Deleted: /

Deleted: /

Deleted: /

Deleted: and even spiritual

Deleted: ¶

Deleted: of

Deleted: that marks

Deleted: a

Deleted: 5

Deleted: 6

Deleted: 7

Deleted: 8,

Deleted: 0

1 call for evidence of the benefit of specific interventions and lack of harm from  
2 screening.  
3

4 Paradoxically, universal screening for IPV in health care settings is commonly  
5 endorsed by international guidelines.[12] However, in poorly resourced contexts such  
6 as South Africa the use of case finding, based on the presentation of specific signs or  
7 symptoms of abuse, is recommended.[13] This focuses healthcare resources and  
8 providers' time on those needing immediate healthcare.  
9  
10  
11  
12

Deleted: 1

Deleted: ,

Deleted: 2

13 In South African primary care, case finding is not practiced routinely and IPV remains  
14 hidden beneath other diagnoses. Health providers are mostly reluctant to ask about  
15 IPV and patients rarely disclose the problem spontaneously. Providers are also  
16 unsure how to manage IPV as it has complex clinical, mental, social and legal  
17 implications. They tend not to accept that IPV is a health problem and in a system  
18 already over burdened by other challenges, may be unwilling to legitimise IPV as part  
19 of their work.[13]  
20  
21  
22  
23

Deleted: diseases

24 Evaluations of initiatives addressing IPV are lacking, and frequently focus on the  
25 criminal justice system.[14] However lack of evidence should not be equated with  
26 lack of effectiveness.[15] Inquiry about IPV offers a way of "uncovering and reframing  
27 a hidden stigma" to provide benefit, even if no action follows forthwith.[16]  
28  
29

Deleted: 3

Deleted: 4

Deleted: 5

30 This study implemented and evaluated a South African protocol for screening and  
31 managing women living with IPV in local primary healthcare settings.[17] This article  
32 reports primarily on the benefits of this intervention from the participants' perspective.  
33  
34  
35

Deleted: evaluated the

Deleted: ation

Deleted: of

Deleted: 6

Deleted: , and harms,

## 36 Methods

### 37 Study design

38 This article presents part of a larger study for which the overall study design was  
39 action-research. The action or project was the implementation of a protocol for the  
40 screening and management of IPV in primary care. The research, by a co-operative  
41 inquiry group, evaluated the experience of the primary care staff and women  
42 survivors of IPV and reflected on their own experience of using the protocol. This  
43 article presents quantitative and qualitative data that was collected 1-month after the  
44 initial screening and use of the protocol and which was designed to obtain feedback  
45  
46  
47  
48  
49  
50  
51  
52

Formatted: Font: (Default) Arial, 12 pt, Font color: Auto, Complex Script  
Font: Arial, 12 pt

Deleted: a

Formatted: Font: (Default) Arial, 12 pt, Font color: Auto, Complex Script  
Font: Arial, 12 pt

Formatted: Font: (Default) Arial, 12 pt, Font color: Auto, Complex Script  
Font: Arial, 12 pt

Formatted: Font: (Default) Arial, 12 pt, Font color: Auto, Complex Script  
Font: Arial, 12 pt

53 4  
54  
55  
56  
57  
58  
59  
60



1 from the women on their experience and response to the intervention. For the  
 2 purposes of this article we have described this as project evaluation.

**Deleted:** Evaluation of a project in South African primary care which implemented a protocol for the recognition, assessment and management of women with IPV.

### 3 **Study setting**

4  
 5 Two urban and three rural health care facilities were purposefully selected in the  
 6 Western Cape. Selection was based on their willingness to participate, availability of  
 7 a psychiatric nurse and a private space for the study nurse. Otherwise facilities were  
 8 typical of primary care in the Western Cape. Patients in ambulatory primary care  
 9 were usually seen by a nurse practitioner.  
 10  
 11  
 12

13  
 14 The two urban community health centres were situated in formerly designated “black”  
 15 and “coloured” townships in Cape Town. One rural site was a community health  
 16 centre in a large rural town and in a former “coloured group area”. The other two rural  
 17 sites were remote, smaller clinics in farming communities. All these public sector  
 18 facilities served low socio-economic groups who were not medically insured.  
 19  
 20  
 21

### 22 **Ethical considerations**

23 Guided by the ethical considerations and research solutions recommended to the  
 24 WHO by the International Research Network on Violence Against Women [18], the  
 25 following issues were prioritised:

**Deleted:** s

**Formatted:** Font: (Default) Arial, 12 pt, Complex Script Font: Arial, 12 pt, Italic

**Formatted:** Normal

**Formatted:** Font: (Default) Arial, 12 pt, Complex Script Font: Arial, 12 pt, Italic

**Formatted:** Font: (Default) Arial, 12 pt, Complex Script Font: Arial, 12 pt, Italic

**Formatted:** List Paragraph, Line spacing: 1.5 lines, Bulleted + Level: 1 + Aligned at: 18 pt + Tab after: 0 pt + Indent at: 36 pt

**Deleted:** Researchers

**Deleted:** co-researchers

- 26 • The safety of respondents and research team was paramount and infused all  
 27 project decisions.
- 28 • Study nurses received specialized training and ongoing support. During the  
 29 research process regular debriefing enabled the study nurses to discuss the  
 30 challenges and feelings raised. Consultations with a psychologist were also  
 31 made available if wanted. This accorded with the ethical responsibility to  
 32 reduce work stress and avert negative consequences.
- 33 • Interviews were conducted privately and confidentially by members of the  
 34 research team, and anonymity was assured.
- 35 • Participants provided informed, written consent and could withdraw or  
 36 reschedule at their will.

**Deleted:**

**Deleted:** conducted

**Deleted:** within

### 43 **Selection of women**

44  
 45 As part of a larger study, all primary care providers at the facilities were asked to  
 46 screen all female patients, of 18 years and older, for a history of IPV during the  
 47 previous 24 months. Facility managers agreed to screen women for 4-8 weeks.  
 48  
 49  
 50  
 51

**Deleted:** ¶

**Deleted:** ies

52  
 53  
 54  
 55  
 56  
 57  
 58  
 59  
 60

1 [However many providers were resistant and uncooperative with our request for](#)  
 2 [universal screening.](#)  
 3  
 4

5 In-service training of the health care practitioners was given by the researchers and  
 6 they were provided with a prompt tool that listed the questions, such as, “How are  
 7 things going in your relationship?” or “In this clinic we ask all women patients if they  
 8 have ever experienced any form of abuse. Have you ever experienced abuse by your  
 9 partner?” Women identified as having experienced IPV were offered a referral to the  
 10 study nurse.  
 11  
 12

### 13 **Intervention**

14 The authors recruited and trained two nurse practitioners to provide the intervention.  
 15 These study nurses, including principal author, then obtained consent and built  
 16 rapport with the women before proceeding with the comprehensive assessment and  
 17 management plan described below ([see appendix A](#)). The protocol tested in this  
 18 study was developed in Cape Town by the Consortium on Violence Against Women  
 19 with the help of Canadian [specialists in IPV](#),<sup>[17]</sup> The suggested assessment and  
 20 management plan included the following:  
 21  
 22

Deleted: screening and management

Deleted: activists

Deleted: 6

- 23 • A systematic history of type and frequency of abuse [specifying particular](#)  
 24 [aspects of emotional, sexual, financial and physical abuse.](#)  
 25
- 26 • A comprehensive medico-legal history including previous HIV tests, sexually  
 27 transmitted infections, risk of pregnancy, previous attempts to enlist  
 28 assistance from police or law courts and forensic documentation of injuries. If  
 29 necessary the woman was offered further testing or treatment.  
 30
- 31 • The original protocol neglected aspects of mental health. Therefore a locally  
 32 adapted version of the WHO's toolkit for the recognition, diagnosis and  
 33 treatment of mental disorders in primary care was added.<sup>[19]</sup> If a mental  
 34 problem was suspected the participant was referred to the psychiatric nurse.  
 35
- 36 • A safety assessment tool intended to ascertain the woman's risk of serious  
 37 injury. Discussion of a safety plan then followed with referral to other health,  
 38 social, legal or police services.  
 39  
 40  
 41  
 42  
 43  
 44  
 45

Deleted: orld

Deleted: ealth

Deleted: rganisation

Deleted: 7

46 Before leaving, women were given an appointment for a follow-up interview 1-month  
 47 later.  
 48  
 49

50  
 51  
 52  
 53 6  
 54  
 55  
 56  
 57  
 58  
 59  
 60

## Data collection

Data was extracted from the record of the initial consultation to give a profile of the management plans. The intended management plan was available to the researcher at the follow up interview.

A different researcher conducted the follow-up interviews. A semi-structured questionnaire explored adherence to, and perceptions of, the care planned during the initial consultation ([see appendix B](#)). Participants reflected on how useful this had been, how they felt about their IPV situation now, and whether they had acted upon their intended plans. This [data is based on the detailed notes of the researcher who recorded participants' responses to the open questions](#). All data was collected in the same way. Sometimes narratives were recorded verbatim in the first person and sometimes paraphrased in the third person.

Deleted: researcher

Deleted:

Deleted: attempted as far as possible to

Deleted: narratives

Deleted: either made detailed notes or recorded key responses verbatim.

## Data analysis

The quantitative data was analysed by Stellenbosch University's Centre for Statistical Consultation in terms of simple frequency tables. The qualitative data was coded and analysed according to the framework method to understand how participants experienced the intervention.<sup>[20]</sup>

Deleted: 18

## Findings

### Profile of the women

Participants comprised 168 females with 56 (33.3%) from urban and 112 (66.6%) from rural facilities. [Overall the mean age was 36.7 years and there was no significant difference between those who did \(36.9 years\) and did not \(36.0 years\) attend follow up \(p=0.59\). Women were mostly married \(82, 48.8%\), cohabiting \(36, 21.4%\) or currently single \(35, 20.8%\), and had a mean of 2.5 children \(range 0-6 children\).](#)

Table I describes the frequency and range of abuse. Over the 2 years preceding this study, 96 (57%) participants admitted to being abused more than twenty times, 27(16%) between eleven and twenty times and 45 (27%) had been abused ten or less times. Each woman experienced on average eight forms of abuse over extended periods. Emotional abuse was commonest and ranged from verbal abuse, to restricted contact with family and friends, to control of the woman's freedom to

7

pursue activities. Physical abuse came a close second, with 115 (68%) having experienced beatings, 82 (50%) kicked, and alarmingly 55 (34%) had been choked.

There was no difference in the types of abuse between the women who did and did not attend follow up.

Table II describes their degree of risk according to the safety scores and shows that 114 (67.9%) were at high or severe risk. The fact that 77 (45.8%) believed he was capable of killing indicates the atmosphere of fear pervading the households. Apart from the danger to the woman herself, 91 (54.2%) admitted that their partners had threatened to kill their children. Overall the mean safety assessment score was 4.85 and there was also no significant difference between those who did (4.81) and did not (4.96) attend follow up (p=0.75).

Table III shows the high levels of suspected mental problems amongst the women and how many were referred for further assessment. More than two thirds of women were suspected of having depression or anxiety disorders, and a third were specifically suspected of post traumatic stress disorder (PTSD). A quarter of women were suspected to have problems with substance abuse, most commonly alcohol. There was no difference in the mental health profile of the women who did and did not attend for follow up.

### Impact and value of different aspects of the intervention

Out of the 168 women 124 (73.8%) returned for the follow up interview. Table IV shows key elements of the management plan and the extent to which women acted on these plans. Significantly, 28/28 (100%) of women followed through on applying for a protection order, 16/19 (84.2%) proceeded to lay a charge and 23/24 (95.8%) saw the social worker.

Table V shows the perceived usefulness of different aspects of the intervention. Over 75% found all elements of their suggested management plans useful.

### Therapeutic effect of empathic listening

Participants explained that telling their story and feeling understood was in itself beneficial.

8

Deleted: III

Deleted: V

Formatted: Font: (Default) Calibri, 11 pt, Complex Script Font: Times New Roman, 11 pt

Formatted: Normal

Deleted: V

Deleted: II

Deleted: I

Deleted: No respondents reported the intervention as harmful.

Deleted: , apart from referral to local non-profit organisations for legal advice

Deleted: Overall the mean age was 36.7 years and there was no significant difference between those who did (36.9 years) and did not (36.0 years) attend follow up (p=0.59). Tables V and VI show that there were no significant differences in the types of abuse and suspected mental health problems between those who did and did not attend follow up. Overall the mean safety assessment score was 4.85 and there was also no significant difference between those who did (4.81) and did not (4.96) attend follow up (p=0.75).¶

Formatted: Font: Arial, Not Bold, Font color: Auto, Complex Script Font: Not Bold

Formatted: Font: Arial

1 "... found the intervention interesting ... felt that ... she could talk to someone and  
 2 they actually heard her. She also felt that she could trust the study nurse. She  
 3 described the social worker and psychiatric nurse and how they just said, 'yes, yes'  
 4 and never really understand. The study nurse gave her advice and told her what she  
 5 could do." (036)

6 Being able to be honest in a supportive and non-judgmental interaction was helpful:

7 "No one had ever spoken to her openly before and it was the first time she was able  
 8 to be completely honest about everything. She does not want to give up on her  
 9 marriage and feels it would be best if she and her husband received counselling  
 10 together." (122)

11 The style of interaction was different from usual and facilitated honest reflection on  
 12 the situation:

13 "Doctor had asked her before why she was so stressed but was too embarrassed to  
 14 tell him. But she was able to talk to (the study nurse) and felt it was good to have  
 15 evaluated her situation." (154)

### 16 Value of clinical care

17 Participants appreciated having their overall health as women taken seriously,  
 18 particularly since many aspects were examined, which were not usually dealt with.  
 19 Many felt relieved to be tested for HIV or assessed for sexually transmitted infections.  
 20 Adherence to other ongoing clinical care, such as antiretroviral treatment, appeared  
 21 to also improve:

22 "When patient first came she describes herself as tense and hysterical. While  
 23 talking to the study nurse she experienced a change inside...hope...Before she  
 24 met her she never thought she could reach the place she is now" (decreased CD4  
 25 count, attending ARV clinic, has gained weight), (048)

### 26 Safety assessment and planning

27 The safety assessment was found to be useful for the following range of reasons:

28 "... made her feel better after hearing that it was wrong to be forced to have sex"  
 29 (149);

30 9

Deleted: ...

Deleted: "

Deleted: ¶

Deleted: A

Deleted: P

Formatted: Indent: Before: 0 pt

1 | "... opened her eyes as she learnt that he should not hurt her like that" (138);  
2 |  
3 | "... saw how dangerous her situation was and decided to get help (an interdict) (097);  
4 |  
5 | "... made her aware of her own faults as well" (082).  
6 |  
7 |

Deleted: "

8 | Participants cited many reasons why they found the safety plan useful:

9 |  
10 | "She is very afraid as feels he could kill her. Good to discuss what to do and make a  
11 | plan – not tell him anything. Just leave." (156)  
12 |  
13 | "In the past always had to scramble around and look for things in an emergency but  
14 | now all her things are in one place." (123)  
15 |  
16 |

Formatted: Indent: Before: 0 pt

### 17 | Referral to other resources

18 |  
19 | Knowing about the available resources and being offered referral was appreciated:

20 |  
21 | "The intervention helped a lot. She did not know that there were so many people to  
22 | help her. She had been to social workers before, but it is not the same. She now  
23 | does not feel alone anymore." (025)  
24 |  
25 |

26 | The referral letter had helped to access services required:

27 |  
28 | "...before "x" court had refused to help her, but with letter they gave her a protection  
29 | order. Now she feels happy." (053)  
30 |  
31 |

32 | Many participants expressed relief at discovering they have rights, and where to find  
33 | help when they need it. Many expressed that the questions and information opened  
34 | up a new world, linking them to resources and showing ways to change their  
35 | circumstances.  
36 |  
37 |

### 38 | Problems with police

39 | Most complaints referred to unsympathetic, impersonal, indiscreet or corrupt police.  
40 | One participant's partner had paid the police off while another's recurrently abusive  
41 | behavior continued despite her protection order. Another explained when she had  
42 | applied for a protection order she was not given a copy of the temporary order. When  
43 | she laid a charge, she received a case number, but no copy of the statement or  
44 | medical report. This failure of authorities to provide copies was commonly reported  
45 | by participants.  
46 |  
47 |

Deleted: was

48 | 10  
49 |  
50 |  
51 |  
52 |  
53 |  
54 |  
55 |  
56 |  
57 |  
58 |  
59 |  
60 |

## Negative reactions to the intervention

Digging up the past had upset a participant. Another complained that she felt very frightened after the interview. One said that things were worse at home because following the intervention, she informed her husband that she intended to divorce him and, he threatened to take the children and jump under a train.

Deleted: when

Deleted: of the pending

Deleted: ,

## Suggestions to improve the help offered

A strong theme was the need for a support group:

“She would like to talk to other women who have been through the same situations. She would like to make friends and learn from other people.” (083)

A professional rural woman desired referral to services outside her community as she felt too exposed to access services within it. Another would only see a female counsellor. Some wanted their partner to be “spoken to” or couple counselling to prevent the impression that only women need help. Some resented a perceived onus on women to resolve problems rather than zero tolerance for men’s abusive behaviour and proactive efforts to get functional interventions in place. Other participants requested practical assistance such as written advice or help with completing protection order application. One woman expressed a need for solitude and space to reflect.

Formatted: Normal, Line spacing: 1.5 lines

Deleted: ¶  
Impact of the intervention on the women and their situations

Deleted: ¶

## Improved mental state

Thirty nine of the participants reported an improved mental state in terms of their mood, sociability or sense of well-being as well as decreased anxiety, suicidal ideation and alcohol abuse. Enhanced parenting emerged frequently as a theme.

Deleted: Multiple

Deleted: T

Deleted: five

Deleted: and

“I used to feel sad all the time. I used to feel useless but now I feel responsible. I can take care of my children now. When I was drinking every day I would take them to a woman to look after them. Now I enjoy my kids and my life more ... since I went to press charges we have not been together and he has not hurt me either.” (047)

“I was a wreck, but when I left her office I could face the world squarely again. She taught me things about myself I did not know. My problems were not solved then and there but I can now notice what I did not before and I feel better about myself as a person.” (166)

11



## Reduced isolation

Some participants found that the intervention encouraged them to reduce their isolation by reconnecting with trustworthy friends or family members in a more open and honest way:

“Communication ... has improved. It is easier for her to disagree and she feels more independent, like she could manage without him. She had isolated herself quite a bit, but is now starting to reach out to her friends again.” (026)

Deleted: ’

## More aware of their rights

Women described no longer “feeling lost” since they learnt about potentially helpful resources:

“For the first time in two years, she phoned the police and used her protection order. She appeared in front of the magistrate and since then he has lived with his family.” (021)

Many discussed a notable improvement in the partners’ behaviour in response to a letter the researcher had written to the police and/or magistrates’ court. In most cases where the criminal justice system was effectively engaged the abusive behaviour stopped completely, usually due to fear of jail.

Deleted: Women reported that obtaining a protection order from the court was more effective than laying a charge at the police station.

## Taking action

On follow-up, some reported having taken action to enhance the quality of their lives. Eleven women ended the relationship after the intervention and reported at follow-up how relieved they felt.

“...after interview she got a protection order and ended her relationship with her gangster boyfriend who uses tic” (metamphetamine). (104)

Deleted: ¶

Deleted: ”

Deleted: Eleven women ended the relationship after the intervention and reported at follow-up how relieved they felt.

## Improved relationships

Many participants described improvement in their family relationships:

“I went to a support group for abused women. A lot changed inside myself, like now I know how to talk to my husband. I was always angry and shouting at him, now we

12



1 communicate better. I am much kinder to the kids. I feel happy now. Before I felt sad,  
2 wanted to cry and stay alone.” (016)

### 3 Change in own behaviour

4  
5  
6 Many participants described how the intervention had motivated change in their own  
7 behavior. Reduced alcohol abuse was a particularly frequent effect, with enhanced  
8 parenting an attendant theme.

9  
10  
11 “Our relationship is going much better than before. I discussed certain things with him  
12 and he understood me. I am drinking much less than before and going to evening  
13 songs again. I never wanted to work on Saturdays but now I am”. (164)

14  
15  
16  
17 “It made her realise that she can no longer continue to use alcohol because it’s  
18 detrimental to her baby. She feels she can talk about things easier and that she  
19 came out a stronger person, able to take a stand.” (166)

20  
21  
22  
23 “Yes, I am different inside. When he tries to provoke me with verbal abuse when  
24 drunk, I don’t allow him to make me angry. He doesn’t even listen to me, but I take  
25 me seriously.” (007)

### 26 Change in partners’ behaviour

27  
28  
29  
30 Change in partners’ behaviour was also reported and 56 reported an improved  
31 relationship with their partner;

32  
33  
34  
35 “There has been great change in her life. The intervention was very useful because  
36 the results have made her feel very happy. The situation at home has improved very  
37 much. Her husband has even been working in their garden and helping the children  
38 with homework - never before.” (065)

39  
40  
41  
42 “She found the whole experience useful because she got a protection order and  
43 there is now someone to stop him. Even though he was famous for his actions locally  
44 and people were aware of his behaviour, nothing was ever done. The protection  
45 order however has changed his behaviour.” (078)

### 46 No real change

47  
48  
49  
50  
51  
52  
53  
54  
55  
56  
57  
58  
59  
60  
Thirty nine participants reported that there had been no real change. The intractable  
challenges that pervaded these responses often involved alcoholism in either or both  
partners, financial constraints, HIV infection as well as participants’ inertia to follow

**Deleted:** “Before I met the researcher, I always felt alone. Secondly when I’m talking to my kids I’m always fighting because I think I am somebody useless. After I talk with her I do not fight so much. I try not to be aggressive. I try to sit down and talk with my children. At least they listen to me – they appreciate me being kind. Also, I have stopped shouting at my baby, now 18 months, because I love her so much and show her that in a kind way ... the last three weeks I feel more normal, like myself.”¶

**Deleted:**

**Deleted:** :

**Deleted:** Some

**Deleted:** process had been useful, even though neither his behaviour nor her circumstances had altered. A few participants found no improvement or only felt better temporarily.

up on referrals made. [Even so, some reported that they had found the process useful.](#)

“No real change – he continues to withhold pay while expecting money from her with which to buy alcohol. Locked her and kids out of home while he was away drinking, very abusive on return. She wants a divorce.” [\(133\)](#)

A common refrain was, “When he is not drunk, he is such a nice guy.”

Another trap was expressed as follows:

“She needs the money that he provides ... a protection order will make him angry and he will not be able to work if he is in jail. She is still very scared of him but he gets angry if she addresses his behavior. He must always be right.” [\(156\)](#)

### Discussion

Women were suffering simultaneously from multiple types of abuse and were mostly at high or severe risk of injury and death. Women showed strong adherence to the components of their [care plan](#) and described all aspects of the intervention as helpful. Women reported significant benefits to their mental health, reduced alcohol abuse, improved relationships, increased self-efficacy and reduced abusive behavior. [Referral to the psychiatric nurse and how this was valued speaks to the impact of psychosocial stressors which characterise our context. Indeed, South African society is so fraught with trauma and violence, that care from a psychiatric nurse is seen to provide a vital safety net, rather than as grounds for declaring someone mentally unfit.](#)

Two characteristics of the intervention appeared particularly important: the style of interaction with the nurse and the comprehensive nature of the assessment.

Being encouraged to tell their story and being listened to with genuine interest and care emerged as key features of the interview which participants valued. This echoes other studies which speak of IPV survivors’ need for compassionate, uninterrupted listening. [\[21,22\]](#) Clearly indicating to patients that violence is not a taboo topic, is in itself a vital therapeutic component of any intervention. [\[23\]](#) The safety assessment provided feedback on how the situation is perceived relative to a different norm, thus enhancing the discrepancy between ‘normalcy’ and their current situation. Our

14

Deleted: ¶

Deleted: management

Deleted: 19,

Deleted: 0

Deleted: 1

findings are congruent with other studies that emphasise the value of empathic, non-judgmental interaction.<sup>[24,25,26]</sup>

- Deleted: of the significance of
- Deleted: is supported
- Deleted: 2
- Deleted: 3
- Deleted: 4
- Deleted: 8,

This study addresses a key gap in the literature since it provides evidence of the benefits of a comprehensive intervention for IPV.<sup>[9,10,11]</sup> In order to be comprehensive, assessment and management should include clinical, psychological, social, legal and advocacy components. Clinical aspects include preventing unwanted pregnancy, sexually transmitted infections and HIV testing. Psychological refers to identification of, and care for, potential mental health problems. Social encompasses referral to support groups, social workers and safety planning. Legal includes referral for a protection order, which was found more effective than laying a criminal charge. Information about rights and local resources was important.

- Deleted: the risk of
- Deleted: aspects include identifying
- Deleted: includes possible

Advocacy and referral to relevant resources has the potential to interrupt and prevent recurrent IPV and associated trauma while enhancing IPV survivors' quality of life.<sup>[9]</sup>

- Deleted: 8

Six months of advocacy has been found to improve emotional health, personal safety, health care and the ability to get medication or treatment while decreasing unhealthy coping behaviours.<sup>[27]</sup>

- Deleted: 5

For eleven participants, the intervention led to termination of the abusive relationship much to their expressed relief. However in almost half of the sample, 56 (45%), it resulted in improved relationships with partners. Contrary to popular belief, most IPV survivors want the violence, not the relationship, to end.<sup>[28]</sup>

- Deleted: T
- Deleted: occasionally
- Deleted: separation
- Deleted: , but more often to
- Deleted: ment in the
- Deleted: the
- Deleted: 6

### Strengths and limitations

The mixed methods facilitated in depth understanding of how women experienced the intervention. Follow up however was limited to 1-month so the study cannot determine if changes were sustained or if additional changes occurred subsequently. A longitudinal evaluation measuring the effect of the intervention on the abuse could provide further evidence of effectiveness. Fewer women than expected were identified and referred to the study and the issues related to screening are presented elsewhere.<sup>[13]</sup>

- Deleted: e
- Deleted: 2

Another limitation of the study was the safety assessment, which seems to have been formulated on the assumption that she would present with a serious injury, that her abuser would be living with her and that he might kill her if/when she gets home, or soon thereafter. The predictive value of the assessment needs to be further evaluated in relation to a specific outcome such as frequency of abuse or likelihood

- Deleted: :
- Deleted: is badly
- Deleted: ed
- Deleted: is
- Deleted: ,
- Deleted: will

15

of being killed in the immediate future. How accurately the tool represents the most important risk factors in the South African setting needs further study. All risk factor counted equally, for example "Has he threatened to kill you?" scores the same as "Is he presently at home?", and yet factors may have different weighting in terms of the risk that they represent. Assessment of risk may also be more valuable in a setting where resources are available to offer the women choices. Nevertheless, participants seemed to find it valuable to receive feedback on their risk from an apparently objective measure.

Deleted: women's risk is concerning since each  
Deleted: s

### Implications and recommendation

The study provides evidence that the intervention was perceived as useful by most participants. Implementation in primary care will require attention to enabling an empathic communication style and a comprehensive assessment and care plan. A proposed model of how the intervention can be integrated into local primary care is described elsewhere.[29] The evaluation of this protocol has provided sufficient evidence to the Department of Health to pilot the model in the Western Cape. While this intervention focuses on women, future research should include working with men.

Deleted: ¶  
Also, what is the reason for doing it? Is one assessing whether the woman is at risk of being repeatedly assaulted? Or is one attempting to identify whether the woman could be killed?¶  
And a further difficulty, what does it help a woman who has nowhere to go to be told she is at severe risk? It is different to do it in a first world context where more resources exist.  
Deleted: have  
Deleted: it validated authoritatively  
Deleted: ¶  
Deleted: management  
Deleted: 7  
Deleted: implement

The communication style mirrors that of motivational interviewing which helps people make difficult decisions about behavior change.[30] Characterised by empathy, clear direction, collaboration, evocation of the client's perspective and solutions, its approach respects autonomy. Training in motivational interviewing as well as the conceptualisation of IPV as a chronic rather than an acute condition should be considered in the roll-out of this model.

Deleted:  
Deleted: ¶  
Deleted: 28

### Conclusion

Women diagnosed with IPV in primary care perceive clear benefit, at least in the short term, from an intervention characterised by both empathic, non-judgmental listening and a comprehensive approach to assessing and managing the clinical, mental, social and legal aspects. District managers should integrate this approach into primary care services and evaluate it further.

Formatted: Heading 1, Automatically adjust right indent when grid is defined, Space After: 0 pt, Line spacing: single, No bullets or numbering, Adjust space between Latin and Asian text, Adjust space between Asian text and numbers

Deleted: <#>Martin LJ, Jacobs T. Screening for Domestic Violence: A Policy and Management Framework for the Health Sector. Cape Town: Institute of Criminology, University of Cape Town; 2003.¶

### Reference List

1

Formatted: Font: (Default) Arial, 12 pt, Complex Script Font: Arial, 12 pt  
Formatted: List Paragraph, Don't adjust right indent when grid is defined, Space After: 12 pt, Line spacing: 1.5 lines, Don't adjust space between Latin and Asian text, Don't adjust space between Asian text and numbers

1. Norman R, Bradshaw D, Schneider M, et al. Estimating the burden of disease attributable to interpersonal violence in South Africa in 2000. *S Afr Med J* 2007;97(8):653-656.
2. Abrahams N, Jewkes R, Martin L, et al. Mortality of Women From Intimate Partner Violence in South Africa: A National Epidemiological Study. *Violence Vict* 2009;24(4):546-556.
3. De Villiers P. Home Violence in South Africa: Surveillance during 1996 by SASPREN, a Sentinel Network of general/family practitioners. *SASPREN News* 1998 September/October;87-89.
4. [Ratele K. Masculinity and male mortality in South Africa. \*African Safety Promotion: A Journal of Injury and Violence Prevention\* 2008; 6\(2\):19-41.](#)
5. [Gouws A. \*Unthinking Citizenship\*. Cape Town: UCT Press; 2005.](#)
6. Domestic Violence Act 116 of 1998 [Online] [s.a.] [Accessed 2011, July 11]; Available: <http://search.sabinet.co.za>
7. Jewkes R. Reflections on Gender Violence in the South African Public Health Agenda. *Development* 2001;44(3):64-68.
8. Garcia-Moreno C, Jansen HAFM, Ellsberg M, et al. World Health Organization's multi-country study on women's health and domestic violence: initial results on prevalence, health outcomes and women's responses. Geneva: World Health Organization Press; 2005.
9. McFarlane JM, Goff JY, O'Brien JA, et al. Secondary Prevention of Intimate Partner Violence: A Randomized Controlled Trial. *Nurs Research* 2006;55(1):52-61.
10. Wathen CN, MacMillan HL. Interventions for Violence Against Women: Scientific Review. *JAMA* 2003;289(5):589-600.
11. Ramsay J, Richardson J, Carter YH, et al. Should health professional screen women for domestic violence? Systematic review. *Br Med J* 2002;325:1-13,1419.
12. Cherniak D, Grant L, Mason R, et al. Intimate Partner Violence Consensus Statement. *J Obstet Gynaecol Can* 2005;27(4):365-418.
13. Joyner K. Health Care for Intimate Partner Violence: Current Standard of Care and Development of Protocol Management. [dissertation]. Stellenbosch: Stellenbosch University; 2009. [Accessed 2011, August 31]; Available: <http://hdl.handle.net/10019.1/2515>

**Deleted:** <#>Morrell R, editor. Changing men in Southern Africa. Pietermaritzburg: University of Natal Press; 2001. ¶

**Formatted:** Font: Not Bold, Font color: Auto, Complex Script Font: Not Bold, English U.S.

**Formatted:** Font: 12 pt, Complex Script Font: Arial, 12 pt

**Formatted:** Don't adjust right indent when grid is defined, Space After: 12 pt, Line spacing: 1.5 lines, Don't adjust space between Latin and Asian text, Don't adjust space between Asian text and numbers

**Formatted:** Font: 12 pt, Complex Script Font: Arial, 12 pt

**Formatted:** Font: (Default) Arial, 12 pt, Complex Script Font: Arial, 12 pt

**Deleted:** <#>¶

**Deleted:** a

**Deleted:**

**Field Code Changed**

**Formatted:** Font: 12 pt, Complex Script Font: Arial, 12 pt

**Deleted:** .

**Formatted:** Font: 12 pt, Complex Script Font: Arial, 12 pt

**Deleted:** [ez.sun.ac.za/WebZ/FETCH?sessionId=01-59109-916469183&recno=5&resultset=1&format=F&next=html/t2/full.html&bad=html/t2/error/badfetch.html&entitytoprecno=5&entitycurrecno=5](http://ez.sun.ac.za/WebZ/FETCH?sessionId=01-59109-916469183&recno=5&resultset=1&format=F&next=html/t2/full.html&bad=html/t2/error/badfetch.html&entitytoprecno=5&entitycurrecno=5)

**Formatted:** Font: 12 pt, Complex Script Font: Arial, 12 pt

**Formatted:** Font: 12 pt, Complex Script Font: Arial, 12 pt

**Deleted:** unpublished

**Deleted:** .

- 1  
2  
3  
4  
5  
6  
7  
8  
9  
10  
11  
12  
13  
14  
15  
16  
17  
18  
19  
20  
21  
22  
23  
24  
25  
26  
27  
28  
29  
30  
31  
32  
33  
34  
35  
36  
37  
38  
39  
40  
41  
42  
43  
44  
45  
46  
47  
48  
49  
50  
51  
52  
53  
54  
55  
56  
57  
58  
59  
60
14. Janssen P, Daschal-Weichhendler H, McGregor M. Assessment for Intimate Partner Violence: Where do we stand? *J Am Board Fam Med* 2006;19(4):413-415.
  15. Jewkes R. Preventing domestic violence. *Br Med J* 2002;324:253-254.
  16. [Bradley F, Smith M, Long J, et al. Reported frequency of domestic violence: cross sectional survey of women attending general practice. \*Br Med J\* 2002;324:274-278.](#)
  17. [Martin LJ, Jacobs T. Screening for Domestic Violence: A Policy and Management Framework for the Health Sector. Cape Town: Institute of Criminology, University of Cape Town; 2003.](#)
  18. [Global Programme on Evidence for Health Policy. Putting Women's Safety First: Ethical and Safety Recommendations for Research on Domestic Violence Against Women. Geneva: World Health Organization, 1999. \[Accessed 2011, September 2\]; Available: \[http://whqlibdoc.who.int/hq/1999/WHO\\\_EIP\\\_GPE\\\_99.2.pdf\]\(http://whqlibdoc.who.int/hq/1999/WHO\_EIP\_GPE\_99.2.pdf\)](#)
  19. Mash B. The development of distance education for general practitioners on common mental disorders through participatory action research. [unpublished dissertation] Stellenbosch: Stellenbosch University; 2002.
  20. Ritchie J, Spencer L. Qualitative data analysis for applied policy research. In Bryman A, Burgess R, editors. *Analysing qualitative data*. London: Routledge; 1993. pp. 173-194.
  21. Limandri B. The Therapeutic Relationship With Abused Women: Nurses' Responses that Facilitate or Inhibit Change. *J Psychosoc Nurs Ment Health Serv* 1987;25(2):9-16.
  22. Bauer HM, Rodriguez MA. Letting Compassion Open the Door: Battered Women's Disclosure to Medical Providers. *Camb Q Healthc Ethics* 1995;4:459-465.
  23. Chescheir N. Violence Against Women: Response From Clinicians. *Ann Emerg Med* 1996;27(6):766-768.
  24. Rhodes KV, Frankel RM, Levinthal N, et al. "You're not a Victim of Domestic Violence, Are You?" Provider-Patient Communication about Domestic Violence. *Ann Int Med* 2007;147:620-627.

**Deleted:** Bradley F, Smith M, Long J, et al. Reported frequency of domestic violence: cross sectional survey of women attending general practice. *Br Med J* 2002;324:274-278.

**Formatted:** Font: (Default) Arial, 12 pt, Complex Script Font: Arial, 12 pt

**Formatted:** Indent: Before: 36 pt, No bullets or numbering

**Deleted:** ¶

**Deleted:** Martin LJ, Jacobs T. Screening for Domestic Violence: A Policy and Management Framework for the Health Sector. Cape Town: Institute of Criminology, University of Cape Town; 2003

**Deleted:** .



- 1 25. Duxbury F. Recognising domestic violence in clinical practice using the  
2 diagnoses of posttraumatic stress disorder, depression and low self-esteem. Br  
3 J Gen Pract 2006;56:294-300.
- 4  
5 26. Stenius VJK, Veysey BM. "It's the Little Things": Women, Trauma and  
6 Strategies for Healing. J Interpers Viol 2005;20:1155-1174.
- 7  
8 27. Hathaway JE, Zimmer B, Willis G, et al. Perceived Changes in Health and  
9 Safety Following Participation in a Health Care-Based Domestic Violence  
10 Program. J Midwifery Womens Health 2008;53(6):547-555.
- 11  
12 28. Mathews S, Abrahams, N. Combining Stories and Numbers: An Analysis of  
13 the Impact of the Domestic Violence Act (No. 116 of 1998) on Women.  
14 Tygerberg: The Gender Advocacy Programme and The Medical Research  
15 Council; 2001.
- 16  
17 29. Joyner K & Mash B. How to provide comprehensive, appropriate care for  
18 survivors of intimate partner violence. In Joyner K, editor. Aspects of Forensic  
19 Medicine: An Introduction for Healthcare Professionals. Cape Town: Juta;  
20 2010. pp. 87-100.
- 21  
22 30. Miller, W. & Rollnick, S. Motivational Interviewing: Preparing People for  
23 Change. New York: The Guilford Press; 2002.
- 24  
25  
26  
27  
28  
29  
30  
31  
32  
33  
34  
35  
36  
37  
38  
39  
40  
41  
42  
43  
44  
45  
46  
47  
48  
49  
50  
51  
52  
53  
54  
55  
56  
57  
58  
59  
60

**Table 1: Prevalence of different types of abuse**

Deleted: V

|                        | <b>All</b>     | <b>Follow up</b> | <b>No follow up</b> | <b>P value</b> |
|------------------------|----------------|------------------|---------------------|----------------|
| <b>Abuse behaviour</b> | <b>N = 168</b> | <b>N=124</b>     | <b>N=44</b>         |                |
|                        | <b>n (%)</b>   | <b>n (%)</b>     | <b>n (%)</b>        |                |
| <b>Emotional</b>       |                |                  |                     |                |
| Shouting               | 139 (82.7)     | 105 (84.7)       | 34 (77.3)           | 0.27           |
| Name calling           | 136 (81.0)     | 102 (82.3)       | 34 (77.3)           | 0.47           |
| Threatening            | 94 (56.0)      | 69 (55.6)        | 25 (56.8)           | 0.89           |
| Restricting contact    | 84 (50.0)      | 64 (51.6)        | 20 (45.4)           | 0.48           |
| Controlling activities | 63 (37.5)      | 47 (37.9)        | 16 (36.4)           | 0.86           |
| Accusations            | 19 (11.3)      | 17 (13.7)        | 2 (4.5)             | 0.07           |
| <b>Physical</b>        |                |                  |                     |                |
| Hit                    | 115 (68.5)     | 86 (69.3)        | 29 (65.9)           | 0.67           |
| Pushed                 | 90 (53.6)      | 56 (45.2)        | 26 (59.1)           | 0.11           |
| Kicked                 | 82 (48.8)      | 46 (37.1)        | 23 (52.3)           | 0.08           |
| Use of weapon          | 69 (41.1)      | 65 (52.4)        | 25 (56.8)           | 0.61           |
| Choked                 | 57 (33.9)      | 41 (33.1)        | 16 (36.4)           | 0.69           |
| Burnt                  | 8 (4.8)        | 5 (4.0)          | 3 (6.8)             | 0.47           |
| Hair pulled            | 2 (1.2)        | 2 (1.6)          | 0 (0.0)             | 0.27           |



Deleted: V

**Table 1: Prevalence of different types of abuse**

| <b>Sexual</b>                |                  |                  |                  |             |
|------------------------------|------------------|------------------|------------------|-------------|
| <u>Infidelity</u>            | <u>72 (42.9)</u> | <u>53 (42.7)</u> | <u>19 (43.2)</u> | <u>0.96</u> |
| <u>Sexual coercion</u>       | <u>55 (32.7)</u> | <u>42 (33.9)</u> | <u>13 (29.5)</u> | <u>0.60</u> |
| <u>Unwanted touching</u>     | <u>41 (24.4)</u> | <u>34 (27.4)</u> | <u>7 (15.9)</u>  | <u>0.11</u> |
| <u>STIs</u>                  | <u>41 (24.4)</u> | <u>32 (25.8)</u> | <u>9 (20.4)</u>  | <u>0.47</u> |
| <b>Financial</b>             |                  |                  |                  |             |
| <u>Withholding money</u>     | <u>72 (42.9)</u> | <u>55 (44.3)</u> | <u>17 (38.6)</u> | <u>0.51</u> |
| <u>Controlling decisions</u> | <u>25 (14.9)</u> | <u>19 (15.3)</u> | <u>6 (13.6)</u>  | <u>0.78</u> |
| <u>Taking money</u>          | <u>23 (13.7)</u> | <u>19 (15.3)</u> | <u>4 (9.1)</u>   | <u>0.28</u> |

Deleted: Table 1: Prevalence of different types of abuse ... [1]

Table II: Safety assessment score

|                                          | n = 168 | %    |
|------------------------------------------|---------|------|
| <b>Safety assessment score</b>           |         |      |
| Not done                                 | 3       | 1.8  |
| Caution (0–3)                            | 50      | 29.8 |
| High risk (4–7)                          | 87      | 51.8 |
| Severe risk (8–11)                       | 27      | 16.1 |
| <b>Safety assessment fields</b>          |         |      |
| Threatened with physical violence?       | 125     | 74.4 |
| Threatened children with violence?       | 109     | 64.9 |
| Firearm in house?                        | 102     | 60.7 |
| Made a death threat?                     | 92      | 54.8 |
| Threatened to kill children?             | 91      | 54.2 |
| Capable of killing?                      | 77      | 45.8 |
| Substance use prior to last abuse?       | 62      | 36.9 |
| Police intervention necessary?           | 54      | 32.1 |
| Is he in the house?                      | 41      | 24.4 |
| Has abuse escalated in severity?         | 35      | 20.8 |
| Received medical treatment for injuries? | 33      | 19.6 |

**Table III: Referred for assessment of mental health problems**

| <u>Referred for further assessment for:</u> | <u>All</u><br><b>N = 168</b><br><u>n (%)</u> | <u>Follow up</u><br><b>N=124</b><br><u>n (%)</u> | <u>No follow up</u><br><b>N=44</b><br><u>n (%)</u> | <u>P value</u> |
|---------------------------------------------|----------------------------------------------|--------------------------------------------------|----------------------------------------------------|----------------|
| <u>Depression</u>                           | <u>110 (65.5)</u>                            | <u>79 (64.7)</u>                                 | <u>31 (72.1)</u>                                   | <u>0.37</u>    |
| <u>PTSD</u>                                 | <u>65 (38.7)</u>                             | <u>44 (35.5)</u>                                 | <u>21 (48.8)</u>                                   | <u>0.12</u>    |
| <u>Anxiety</u>                              | <u>121 (72.0)</u>                            | <u>91 (74.6)</u>                                 | <u>30 (69.8)</u>                                   | <u>0.24</u>    |
| <u>Substance abuse</u>                      | <u>42 (25.0)</u>                             | <u>31 (25.0)</u>                                 | <u>11 (25.6)</u>                                   | <u>0.13</u>    |

Deleted: ¶

**Table IV: Adherence of women to plans made by 1-month follow up (N=124)**

Deleted: ¶

|                                      | <b>Management plan</b> |          | <b>Action</b> |          | <b>Adherence</b> |
|--------------------------------------|------------------------|----------|---------------|----------|------------------|
|                                      | <b>N</b>               | <b>%</b> | <b>n</b>      | <b>%</b> | <b>n/N %</b>     |
| Wants HIV test                       | 56                     | 45.2     | 31            | 25.0     | 55.4             |
| Wants rapid plasma reagin test       | 25                     | 20.2     | 10            | 8.1      | 40.0             |
| Wants pregnancy test                 | 6                      | 4.8      | 10            | 8.1      | 100.0            |
| Intends to obtain a protection order | 28                     | 22.6     | 28            | 22.6     | 100.0            |
| Intends to lay a charge              | 19                     | 15.3     | 16            | 12.9     | 84.2             |
| Referral to NPO for legal support    | 15                     | 12.1     | 7             | 5.6      | 46.7             |
| Referral to NPO counselling          | 32                     | 25.8     | 12            | 9.7      | 37.5             |
| Referral to psychiatric nurse        | 58                     | 46.8     | 28            | 22.6     | 48.3             |
| Referral to social worker            | 24                     | 19.4     | 23            | 18.5     | 95.8             |

NPO=Non profit organisation

**Table V Perceived usefulness of different aspects of the intervention**

Deleted: I  
 Deleted: Table VI: Referred for assessment of mental health problems¶  
 ¶  
 Referred for further assessment for:¶

| Intervention                                  | N   | Very helpful |      | Helpful |      | Unhelpful |      | Harmful |     | Don't know |      |
|-----------------------------------------------|-----|--------------|------|---------|------|-----------|------|---------|-----|------------|------|
|                                               |     | n            | %    | n       | %    | n         | %    | n       | %   | n          | %    |
| <a href="#">Safety assessment</a>             | 106 | 31           | 29.2 | 54      | 50.9 | 6         | 5.7  | 0       | 0.0 | 5          | 14.2 |
| <a href="#">Safety plan</a>                   | 102 | 33           | 32.4 | 44      | 43.1 | 9         | 8.8  | 0       | 0.0 | 6          | 15.7 |
| <a href="#">Protection order</a>              | 28  | 14           | 50.0 | 9       | 32.1 | 4         | 14.3 | 0       | 0.0 | 1          | 3.6  |
| <a href="#">Going to NPO for legal advice</a> | 7   | 2            | 28.6 | 2       | 28.6 | 1         | 14.3 | 0       | 0.0 | 2          | 28.6 |
| <a href="#">Going to NPO for counselling</a>  | 12  | 5            | 41.7 | 4       | 33.3 | 1         | 8.3  | 0       | 0.0 | 2          | 16.7 |
| <a href="#">Going to psychiatric nurse</a>    | 28  | 13           | 46.4 | 13      | 46.4 | 2         | 7.1  | 0       | 0.0 | 0          | 0.0  |
| <a href="#">Going to social worker</a>        | 23  | 6            | 26.1 | 10      | 43.5 | 3         | 13.0 | 0       | 0.0 | 4          | 17.4 |
| <a href="#">Laying criminal charge</a>        | 16  | 5            | 31.3 | 10      | 62.5 | 1         | 6.3  | 0       | 0.0 | 0          | 0.0  |

NPO=Non profit organisation

Deleted: ¶  
 Intervention

**Acknowledgements:**

Critical review: Julia Blitz

[Study nurses: Nobuhle Bakumeni, Maggie Abrahams, Kate Joyner](#)

[Follow up researchers: Liezel Le Roux, Kirsten Thomson, Maggie Abrahams, Kate Joyner](#)

[Statistician: Martin Kidd](#)

**Competing Interests:**

The authors declare no conflict of interests.

**Funding:**

24

Deleted: ¶  
 Table V: Prevalence of different types of abuse

1 This work was supported by two National Research Foundation Thuthuka grants  
2 (TTK2006052200003 & TTK2005072900031) and two Harry and Doris Crossley  
3 awards from Stellenbosch University.  
4

5 **Contributor Statement**  
6

7 Conception and design: K Joyner and R Mash

8 Data collection: K Joyner, N Bakumeni, M Abrahams, L Le Roux, K Thomson

9 Analysis of the data: K Joyner, M Kidd (statistician)

10 Interpretation of the data: K Joyner, R Mash

11 Drafting of the article: K Joyner and R Mash

12 Critical revision of the article for important intellectual content: K Joyner, R Mash and  
13 J Blitz

14 Final approval of the article: K Joyner and R Mash  
15  
16  
17  
18  
19  
20  
21  
22  
23  
24  
25  
26  
27  
28  
29  
30  
31  
32  
33  
34  
35  
36  
37  
38  
39  
40  
41  
42  
43  
44  
45  
46  
47  
48  
49  
50  
51  
52  
53  
54  
55  
56  
57  
58  
59  
60

25

For peer review only

**Table I: Prevalence of different types of abuse**

| <b>Abuse behavior</b>           | <b>n = 168</b> | <b>%</b> |
|---------------------------------|----------------|----------|
| <b>Emotional</b>                |                |          |
| Shouting                        | 139            | 82.7     |
| Name calling                    | 136            | 81.0     |
| Threatening                     | 94             | 56.0     |
| Restricting contact             | 84             | 50.0     |
| Controlling activities          | 63             | 37.5     |
| Accusations                     | 19             | 11.3     |
| Other                           | 16             | 9.5      |
| <b>Physical</b>                 |                |          |
| Hit                             | 115            | 68.5     |
| Pushed                          | 90             | 53.6     |
| Kicked                          | 82             | 48.8     |
| Use of weapon                   | 69             | 41.1     |
| Choked                          | 57             | 33.9     |
| Burnt                           | 8              | 4.8      |
| Hair pulled                     | 2              | 1.2      |
| <b>Sexual</b>                   |                |          |
| Infidelity                      | 72             | 42.9     |
| Sexual coercion                 | 55             | 32.7     |
| Unwanted touching               | 41             | 24.4     |
| Sexually transmitted infections | 41             | 24.4     |
| Other                           | 6              | 3.6      |

**Table I: Prevalence of different types of abuse**

| <b>Financial</b>                              |              |      |
|-----------------------------------------------|--------------|------|
| Withholding money                             | 72           | 42.9 |
| Controlling decisions                         | 25           | 14.9 |
| Taking money                                  | 23           | 13.7 |
| Other                                         | 6            | 3.6  |
| <b>Total reports of an incidence of abuse</b> | <b>1 315</b> |      |

Page 24: [2] Deleted

IT

9/1/2011 2:57:00 PM

**Table VI: Referred for assessment of mental health problems**

| <b>Referred for further assessment for:</b> | <b>All<br/>N = 168<br/>n (%)</b> | <b>Follow up<br/>N=124<br/>n (%)</b> | <b>No follow up<br/>N=44<br/>n (%)</b> | <b>P value</b> |
|---------------------------------------------|----------------------------------|--------------------------------------|----------------------------------------|----------------|
| Depression                                  | 110 (65.5)                       | 79 (64.7)                            | 31 (72.1)                              | 0.37           |
| PTSD                                        | 65 (38.7)                        | 44 (35.5)                            | 21 (48.8)                              | 0.12           |
| Anxiety                                     | 121 (72.0)                       | 91 (74.6)                            | 30 (69.8)                              | 0.24           |
| Substance abuse                             | 42 (25.0)                        | 31 (25.0)                            | 11 (25.6)                              | 0.13           |

Page 24: [3] Deleted

Information Technology

9/2/2011 12:18:00 PM

| <b>Intervention</b> | <b>N</b> | <b>Very helpful</b> |          | <b>Helpful</b> |          | <b>Unhelpful</b> |          | <b>Don't know</b> |          |
|---------------------|----------|---------------------|----------|----------------|----------|------------------|----------|-------------------|----------|
|                     |          | <b>n</b>            | <b>%</b> | <b>n</b>       | <b>%</b> | <b>n</b>         | <b>%</b> | <b>n</b>          | <b>%</b> |
|                     |          |                     |          |                |          |                  |          |                   |          |

|                               |     |    |      |    |      |   |      |    |      |
|-------------------------------|-----|----|------|----|------|---|------|----|------|
| Safety assessment             | 106 | 31 | 29.2 | 54 | 50.9 | 6 | 5.7  | 15 | 14.2 |
| Safety plan                   | 102 | 33 | 32.4 | 44 | 43.1 | 9 | 8.8  | 16 | 15.7 |
| Protection order              | 28  | 14 | 50.0 | 9  | 32.1 | 4 | 14.3 | 1  | 3.6  |
| Going to NPO for legal advice | 7   | 2  | 28.6 | 2  | 28.6 | 1 | 14.3 | 2  | 28.6 |
| Going to NPO for counselling  | 12  | 5  | 41.7 | 4  | 33.3 | 1 | 8.3  | 2  | 16.7 |
| Going to psychiatric nurse    | 28  | 13 | 46.4 | 13 | 46.4 | 2 | 7.1  | 0  | 0.0  |
| Going to social worker        | 23  | 6  | 26.1 | 10 | 43.5 | 3 | 13.0 | 4  | 17.4 |
| Laying criminal charge        | 16  | 5  | 31.3 | 10 | 62.5 | 1 | 6.3  | 0  | 0.0  |

Page 24: [4] Deleted

IT

9/1/2011 6:24:00 PM



Table V: Prevalence of different types of abuse

|                        | All<br>N = 168<br>n (%) | Follow up<br>N=124<br>n (%) | No follow up<br>N=44<br>n (%) | P value |
|------------------------|-------------------------|-----------------------------|-------------------------------|---------|
| <b>Abuse behaviour</b> |                         |                             |                               |         |
| <b>Emotional</b>       |                         |                             |                               |         |
| Shouting               | 139 (82.7)              | 105 (84.7)                  | 34 (77.3)                     | 0.27    |
| Name calling           | 136 (81.0)              | 102 (82.3)                  | 34 (77.3)                     | 0.47    |
| Threatening            | 94 (56.0)               | 69 (55.6)                   | 25 (56.8)                     | 0.89    |
| Restricting contact    | 84 (50.0)               | 64 (51.6)                   | 20 (45.4)                     | 0.48    |
| Controlling activities | 63 (37.5)               | 47 (37.9)                   | 16 (36.4)                     | 0.86    |
| Accusations            | 19 (11.3)               | 17 (13.7)                   | 2 (4.5)                       | 0.07    |
| <b>Physical</b>        |                         |                             |                               |         |
| Hit                    | 115 (68.5)              | 86 (69.3)                   | 29 (65.9)                     | 0.67    |
| Pushed                 | 90 (53.6)               | 56 (45.2)                   | 26 (59.1)                     | 0.11    |
| Kicked                 | 82 (48.8)               | 46 (37.1)                   | 23 (52.3)                     | 0.08    |
| Use of weapon          | 69 (41.1)               | 65 (52.4)                   | 25 (56.8)                     | 0.61    |
| Choked                 | 57 (33.9)               | 41 (33.1)                   | 16 (36.4)                     | 0.69    |
| Burnt                  | 8 (4.8)                 | 5 (4.0)                     | 3 (6.8)                       | 0.47    |
| Hair pulled            | 2 (1.2)                 | 2 (1.6)                     | 0 (0.0)                       | 0.27    |

**Table V: Prevalence of different types of abuse**

| <b>Sexual</b>         |           |           |           |      |
|-----------------------|-----------|-----------|-----------|------|
| Infidelity            | 72 (42.9) | 53 (42.7) | 19 (43.2) | 0.96 |
| Sexual coercion       | 55 (32.7) | 42 (33.9) | 13 (29.5) | 0.60 |
| Unwanted touching     | 41 (24.4) | 34 (27.4) | 7 (15.9)  | 0.11 |
| STIs                  | 41 (24.4) | 32 (25.8) | 9 (20.4)  | 0.47 |
| <b>Financial</b>      |           |           |           |      |
| Withholding money     | 72 (42.9) | 55 (44.3) | 17 (38.6) | 0.51 |
| Controlling decisions | 25 (14.9) | 19 (15.3) | 6 (13.6)  | 0.78 |
| Taking money          | 23 (13.7) | 19 (15.3) | 4 (9.1)   | 0.28 |

## **COREQ 32-ITEM CHECKLIST** (Tong, Sainsbury & Craig, 2007)

### **Domain 1: Research team and reflexivity**

#### **Personal characteristics**

##### **1. Interviewer/Facilitator**

Kate Joyner: conducted first and follow-up interviews and focus groups

##### **2. Credentials** *M.Soc. Sc; Advanced Diploma in Psychiatric Nursing; Diploma in General, Community and Psychiatric Nursing and Midwifery.*

##### **3. Occupation** Programme coordinator: Mental Health and Gender-Based Violence Nursing, Stellenbosch University; doctoral student.

##### **4. Gender** Female

##### **5. Research experience**

Conceptualised and supervised a student project which subsequently won the Dumo Baqwa award for best original research article in South African Journal of Family Practice 2007: Joyner K. et al. Emergency care provision for, and psychological distress in, survivors of domestic violence. SA Fam Pract 2007;49(3).

##### **Training**

Active in the NGO sector since 1985

Three social science degrees at UCT, was busy doing a doctorate in Social Science Research Methodology.

Seven years of integrating how to provide care for those affected by gender-based violence into all undergraduate, postgraduate and non-degree purpose training at Stellenbosch University.

Organised and participated in all cooperative inquiry group meetings.

##### **1. Facilitator**

Robert Mash: conducted a focus group, and facilitated all cooperative inquiry group meetings

##### **2. Credentials** *PhD; MBChB; MRCGP; DCH; CRCOG*

##### **3. Occupation** Assoc. Professor in Family Medicine and Primary Care, Stellenbosch University

##### **4. Gender** Male

##### **5. Research experience and training** Research projects currently focus on chronic diseases (diabetes, asthma), training of family physicians; defining family medicine in Sub-Saharan Africa, motivational interviewing, a survey for reasons for encounter and diagnoses in South African primary care. Supervisor of 30 Masters and 7 Doctoral students at Stellenbosch University.

##### **1. Interviewer/Facilitator**

Maggie Abrahams: conducted first and follow up interviews and a focus group

##### **2. Credentials** *Diploma in Community Health Science and*

*Administration, Registration as Midwife and Psychiatric Professional Nurse*

3. **Occupation** Research assistant/study nurse; Masters student.
  4. **Gender** Female
  5. **Experience** No former research experience, three decades of nursing experience in the clinical field.
- Training** Three day training before beginning data collection and participated in five cooperative inquiry group meetings.

1. **Interviewer**  
Nobuhle Bakumeni: conducted first interviews
2. **Credentials** *Diploma in General Nursing Science and Midwifery; Certificate in Advanced Health Management Programme*
3. **Occupation** Nurse clinician at HIV/ARV clinics in Eastern Cape; Masters student.
4. **Gender** Female
5. **Research experience** Worked as research assistant and facilitator to improve water sanitation in East London for 9 months on a Water Commission research project.  
**Training** Two day training before beginning data collection and one cooperative inquiry group meeting during her involvement in the research process. Principal author also met with Nobuhle twice a week during data collection process to provide supervision (support).

1. **Interviewer**  
Liezal Le Roux: conducted follow-up interviews
2. **Credentials** *B Cur; Registration as General, Community and Psychiatric Professional Nurse and Midwife*
3. **Occupation** Research assistant at Medical Research Council's Unit for Anxiety and Stress Disorders.
4. **Gender** Female
5. **Research experience**  
Student research project supervised by Joyner and subsequent employment as research assistant, see occupation above.  
**Training**  
Two day training before data collection began.

1. **Interviewer**  
Kirsten Thomson: conducted follow-up interviews
2. **Credentials** *Bachelor of Arts*
3. **Occupation** Research assistant; Honours degree in History student
4. **Gender** Female
5. **Research experience**  
Kirsten was working as a research assistant on the Groote Schuur History project. She had participated in 19 interviews and was coordinating the study.

1  
2           **Training**            Training discussions in meetings with Kate, and  
3 participated in three cooperative inquiry group meetings.  
4  
5  
6

7  
8           **Relationship with participants**  
9

10           **6. Relationship established**

11            Most participants had no prior relationship with interviewers, except in case of  
12 Maggie Abrahams who was the full time study nurse in the region she had  
13 grown up in.  
14  
15

16  
17  
18           **7. Participant knowledge of the interviewer**

19            Participants were informed that she was the study nurse, and that her role was  
20 to provide comprehensive assistance to them. Participants were informed that  
21 the role of the follow-up interviewer was to understand whether the  
22 intervention (1<sup>st</sup> interview) had been of use to them.  
23  
24  
25

26  
27           **8. Interviewer characteristics**

28            Participants only had positive things to say about all interviewers. Their  
29 experience of the intervention was surprisingly satisfactory – perhaps due to  
30 the historical and continuing neglect of intimate partner violence as a  
31 legitimate, important health concern.  
32 Significantly also, all first interviewers had left or were living in abusive  
33 relationships. Out of 11 potential interviewers, these three committed to  
34 participating in the project and from participant's feedback it is clear that their  
35 approach was a non-judgmental one of insight, compassion and respect .  
36  
37  
38  
39

40           **Domain 2: study design**  
41

42           **Theoretical framework**

43  
44           **9. Methodological orientation and Theory**

45            Professional action research framework for a mixed method intervention study  
46  
47

48           **Participant selection**

49  
50           **10. Sampling**

51            168 participants choose to participate in the  
52 intervention  
53

54  
55           **11. Method of approach**

56            Female patients, 18 and older, were  
57 screened during their  
58 healthcare consultation  
59  
60

**12. Sample size**

          168 women, 18 and older.

1  
2  
3  
4  
5  
6  
7  
8  
9  
10  
11  
12  
13  
14  
15  
16  
17  
18  
19  
20  
21  
22  
23  
24  
25  
26  
27  
28  
29  
30  
31  
32  
33  
34  
35  
36  
37  
38  
39  
40  
41  
42  
43  
44  
45  
46  
47  
48  
49  
50  
51  
52  
53  
54  
55  
56  
57  
58  
59  
60

**13. Non-participation** No idea because it wasn't a feature of the methodology

### Setting

**14. Setting of data collection** Primary health care facilities (CHCs)

**15. Presence of non-participants** Occasionally the participant's child was present.

**16. Description of sample** The sample consisted primarily of poor, relatively uneducated, African women and women of mixed origin.

### Data Collection

#### 17. Interview guide

The first interview involved piloting a protocol for the screening and management of intimate partner violence (Martin L, Jacobs T. Screening for Domestic Violence: A Policy and Management Framework for the Health Sector. Cape Town: Institute of Criminology, University of Cape Town, 2003. ). Professional action research methodology enabled us to modify it for use in the primary health care sector.

The research team compiled the follow-up interview tool to assess participant's experience of the intervention and what action they had subsequently taken to address the care plan she had formulated with the study nurse/researcher.

#### 18. Repeat interviews

Nil

#### 19. Audio/visual recording

Focus groups were audio recorded with a digital device.  
First and follow-up interviews were manually transcribed.

#### 20. Field notes

Field notes were made and analysed as part of the bigger study.

#### 21. Duration

First interview (intervention): 60 – 90 minutes

Follow-up interview: 30 minutes

Focus groups: 60 minutes

#### 22. Data saturation

Yes, discussed in supervision with Prof Mash and cooperative inquiry group meetings.

#### 23. Transcripts returned

No

**Domain 3: analysis and findings****24. Number of data coders**

Coded by principal author and verified by three co-researchers.

**25. Description of the coding tree**

Evident from results

**26. Derivation of themes**

Derived from the data

**27. Software**

SPSS for quantitative data

Manual coding of qualitative data according to Framework Method.

**28. Participant checking**

Yes, that was the purpose of the follow-up interview and is reported on in the article submitted.

**Reporting****29. Quotations presented**

Multiple participants' quotations are presented to illustrate themes.

**30. Data and findings consistent**

Yes

**31. Clarity of major themes**

Yes, major themes are clearly presented in the findings.

**32. Clarity of minor themes**

Yes, there is a discussion of minor themes

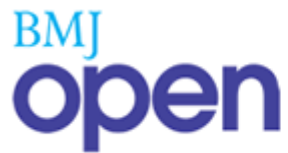

**The value of intervening for intimate partner violence in South African primary care: Project evaluation**

|                                 |                                                                                                                                                   |
|---------------------------------|---------------------------------------------------------------------------------------------------------------------------------------------------|
| Journal:                        | <i>BMJ Open</i>                                                                                                                                   |
| Manuscript ID:                  | bmjopen-2011-000254.R2                                                                                                                            |
| Article Type:                   | Research                                                                                                                                          |
| Date Submitted by the Author:   | 30-Sep-2011                                                                                                                                       |
| Complete List of Authors:       | Joyner, Kate; Stellenbosch University, Division of Nursing<br>Mash, Robert; Stellenbosch University, Division of Family Medicine and Primary Care |
| <b>Primary Subject Heading</b>: | Evidence-based practice                                                                                                                           |
| Keywords:                       | MEDICAL EDUCATION & TRAINING, PRIMARY CARE, MENTAL HEALTH                                                                                         |
|                                 |                                                                                                                                                   |

SCHOLARONE™  
Manuscripts

Peer Review Only



# The value of intervening for intimate partner violence in South African primary care: Project evaluation

---

## Abstract

### Objectives

Intimate partner violence (IPV) is an important contributor to the burden of disease in South Africa. Evidence-based approaches to IPV in primary care are lacking. This study evaluated a project that implemented a South African protocol for screening and managing IPV. This article reports primarily on the benefits of this intervention from the perspective of the women IPV survivors.

### Design

This was a project evaluation involving two urban and three rural primary care facilities. Over 4-8 weeks primary care providers screened adult women for a history of IPV within the previous 24 months and offered referral to the study nurse. The study nurse assessed and managed the women according to the protocol. Researchers interviewed the participants 1-month later to ascertain adherence to their care plan and their views on the intervention.

Deleted: manag

### Results

In total 168 women were assisted and 124 (73.8%) returned for follow up. Emotional (139, 82.7%), physical (115, 68.5%), sexual (72, 42.9%) and financial abuse (72, 42.9%) were common and 114 (67.9%) were at high/severe risk of harm. Adherence to the management plan ranged from testing for syphilis 10/25 (40.0%) to consulting a psychiatric nurse 28/58 (48.3%) to obtaining a protection order 28/28 (100.0%). Over 75% perceived all aspects of their care as helpful, except for legal advice from a non-profit organisation.

Deleted: non-profit organisation

Women reported significant benefits to their mental health, reduced alcohol abuse, improved relationships, increased self-efficacy and reduced abusive behavior. Two characteristics seemed particularly important: the style of interaction with the nurse and the comprehensive nature of the assessment.

### Conclusion

Female IPV survivors in primary care experience benefit from an empathic, comprehensive approach to assessing and assisting with the clinical, mental, social and legal aspects. Primary care managers should find ways to integrate this into primary care services and evaluate it further.

1 ARTICLE SUMMARY

2 ARTICLE FOCUS

- 3
- 4 • Did women experiencing IPV find assessment and management in primary
  - 5 care beneficial?
  - 6
  - 7 • What aspects of their care plan did they adhere to?
  - 8
  - 9 • What aspects of their care plan did they find most helpful?

10

11 KEY MESSAGES

- 12 • Women diagnosed with IPV in primary care perceive benefit from an
- 13 intervention characterised by both empathic, non-judgmental listening and a
- 14 comprehensive approach to the clinical, mental, social and legal aspects.
- 15
- 16 • Women reported benefits to their mental health, alcohol use, relationships,
- 17 and experience of abusive behaviour.
- 18
- 19 • IPV survivors were most proactive about securing protection orders, laying
- 20 criminal charges, and testing for pregnancy post-intervention.
- 21
- 22
- 23
- 24

25 STRENGTHS AND LIMITATIONS

- 26 • A comprehensive biopsychosocial and forensic intervention in primary care
- 27 was tested, securing follow-up which revealed its value.
- 28
- 29 • The study was conducted under usual working conditions and resource
- 30 availability making the findings applicable to the primary care context.
- 31
- 32 • Although the study only involved five purposely selected facilities, the
- 33 rural/urban mix makes it likely that these are fairly typical.
- 34
- 35 • Obsequiousness bias was reduced by different researchers conducting the
- 36 follow up interviews.
- 37
- 38 • Follow up after one month is too short to predict the longer term
- 39 consequences of the intervention.
- 40
- 41 • The study measured the effect of the intervention on the abuse indirectly via
- 42 participants' self-reports.
- 43
- 44

45 **Introduction**

46 Interpersonal violence is the second highest contributor to the burden of disease after

47 HIV and AIDS, with intimate partner violence (IPV) accounting for 62.4% of the total

48 burden in females.[1] South Africa's intimate femicide rate is the highest globally.[2]

49 IPV appears to be twice as common in rural South African settings compared to

50

51

52

53

54

55

56

57

58

59

60

1 urban, with a complex interplay of racial, gender and economic forces, maintaining  
2 women in abusive situations.[3] The use of violence to maintain dominance in  
3 interpersonal relationships forms a cross-cultural cornerstone of masculinity in South  
4 Africa.[4] For these reasons, it is crucial that healthcare providers attend to IPV  
5 survivors' needs comprehensively.  
6  
7

8  
9 Gender-based violence is an umbrella term for forms of interpersonal violence  
10 characterized by gendered power imbalances. Fitting within this, IPV refers to  
11 emotional, physical, sexual or financial abuse between intimates. It also fits within  
12 broader sub-categories of gender-based violence, namely family and domestic  
13 violence.  
14  
15

16  
17 South African laws and policy on violence against women acknowledge it to be a  
18 significant human rights and public health issue yet extreme levels of gender-based  
19 violence, poverty and HIV infection among women reveal a chasm between the daily  
20 lives of female citizens and apparent gains in the public sphere.[5] South Africa's  
21 Domestic Violence Act (116 of 1998) includes a definition of domestic violence so  
22 comprehensive it is a legislative standard bearer internationally.[6] An inexpensive  
23 and unsophisticated civil procedure for obtaining a protection order clearly  
24 demarcates the duties of the police.[7] Unfortunately, specific responsibilities for  
25 healthcare providers are not outlined and a gulf exists between the contents of the  
26 Act and its practical implementation.  
27  
28  
29  
30  
31

32  
33 The World Health Organization (WHO) now positions IPV as an urgent public health  
34 priority.[8] Internationally, evidence-based interventions in primary care settings are  
35 lacking.[9,10] A systematic review on screening for IPV in primary care concludes  
36 that while "domestic violence is a common problem with major health consequences  
37 for women, implementation of screening programmes cannot be justified." [11] They  
38 call for evidence of the benefit of specific interventions and lack of harm from  
39 screening.  
40  
41  
42

43  
44 Paradoxically, universal screening for IPV in health care settings is commonly  
45 endorsed by international guidelines.[12] However, in poorly resourced contexts such  
46 as South Africa the use of case finding based on the presentation of specific signs or  
47 symptoms of abuse, is recommended.[13] This focuses healthcare resources and  
48 providers' time on those needing immediate healthcare.  
49  
50  
51

52  
53 3  
54  
55  
56  
57  
58  
59  
60

In South African primary care, case finding is not practiced routinely and IPV remains hidden beneath other diagnoses. Health providers are mostly reluctant to ask about IPV and patients rarely disclose the problem spontaneously. Providers are also unsure how to manage IPV as it has complex clinical, mental, social and legal implications. They tend not to accept that IPV is a health problem and in a system already overburdened by other challenges, may be unwilling to legitimise IPV as part of their work.[14]

Deleted: 3

Evaluations of initiatives addressing IPV are lacking, and frequently focus on the criminal justice system.[15] However lack of evidence should not be equated with lack of effectiveness.[16] Inquiry about IPV offers a way of “uncovering and reframing a hidden stigma” to provide benefit, even if no action follows forthwith.[17]

Deleted: 4

Deleted: 5

Deleted: 6

This article presents part of a larger study that implemented and evaluated a South African protocol for screening and managing women living with IPV in local primary healthcare settings.[18] This article reports on how acceptable this protocol was to the women and what they perceived as its benefits.

Deleted: 7

Deleted: primarily

**Methods**

Deleted: the benefits of this intervention from the participants' perspective. ¶

**Study design**

The overall design for the larger study was action-research. The action or project was the implementation of a protocol for the screening and management of IPV in primary care. The research, by a co-operative inquiry group, evaluated the experience of the primary care staff and women survivors of IPV and reflected on their own experience of using the protocol. This article presents quantitative and qualitative data that was collected 1-month after the initial screening and use of the protocol and which was designed to obtain feedback from the women on their experience and response to the intervention. For the purposes of this article we have described this as project evaluation.

Deleted: This article presents part of a larger study for which t

Deleted: study

Deleted: .

Deleted:

**Study setting**

Two urban and three rural health care facilities were purposefully selected in the Western Cape. Selection was based on their willingness to participate, availability of a psychiatric nurse and a private space for the study nurse. Otherwise facilities were typical of primary care in the Western Cape. Patients in ambulatory primary care were usually seen by a nurse practitioner.

1 The two urban community health centres were situated in formerly designated “black”  
2 and “coloured” townships in Cape Town. One rural site was a community health  
3 centre in a large rural town and in a former “coloured group area”. The other two rural  
4 sites were remote, smaller clinics in farming communities. All these public sector  
5 facilities served low socio-economic groups who were not medically insured.  
6  
7

### 9 Ethical considerations

10 Guided by the ethical considerations and research solutions recommended to the  
11 WHO by the International Research Network on Violence Against Women [19], the  
12 following issues were prioritised:  
13  
14

Deleted: 8

- 15 • The safety of respondents and research team was paramount and infused all  
16 project decisions.
- 17 • Study nurses received specialized training and ongoing support. During the  
18 research process regular debriefing enabled the study nurses to discuss the  
19 challenges and feelings raised. Consultations with a psychologist were also  
20 made available if wanted. This accorded with the ethical responsibility to  
21 reduce work stress and avert negative consequences.
- 22 • Interviews were conducted privately and confidentially by members of the  
23 research team, and anonymity was assured.
- 24 • Participants provided informed, written consent and could withdraw or  
25 reschedule at their will. [Ethics approval was given by the Health Research  
26 Ethics Committee at Stellenbosch University \(Reference No 6/10/216\)](#),  
27  
28  
29  
30  
31  
32  
33

Deleted: ¶

Deleted: xxxxxxxxx

Formatted: Font: Arial, 12 pt

### 34 Selection of women

35 As part of a larger study, all primary care providers at the facilities were asked to  
36 screen all female patients, of 18 years and older, for a history of IPV during the  
37 previous 24 months. Facility managers agreed to screen women for 4-8 weeks.  
38 However many providers were resistant and uncooperative with our request for  
39 universal screening.  
40  
41  
42

43 In-service training of the health care practitioners was given by the researchers and  
44 they were provided with a prompt tool that listed the questions, such as, “How are  
45 things going in your relationship?” or “In this clinic we ask all women patients if they  
46 have ever experienced any form of abuse. Have you ever experienced abuse by your  
47 partner?” Women identified as having experienced IPV were offered a referral to the  
48 study nurse.  
49  
50  
51  
52

Deleted:

53  
54  
55  
56  
57  
58  
59  
60

## Intervention

The authors recruited and trained two nurse practitioners to provide the intervention. These study nurses, including principal author, then obtained consent and built rapport with the women before proceeding with the comprehensive assessment and management plan described below (see appendix A). The protocol tested in this study was developed in Cape Town by the Consortium on Violence Against Women with the help of Canadian specialists in IPV.<sup>[18]</sup> The suggested assessment and management plan included the following:

- A systematic history of type and frequency of abuse specifying particular aspects of emotional, sexual, financial and physical abuse.
- A comprehensive medico-legal history including previous HIV tests, sexually transmitted infections, risk of pregnancy, previous attempts to enlist assistance from police or law courts and forensic documentation of injuries. If necessary the woman was offered further testing or treatment.
- The original protocol neglected aspects of mental health. Nine questions to screen for mental health problems were added from a locally adapted version of the WHO's toolkit for the recognition, diagnosis and treatment of mental disorders in primary care.<sup>[20]</sup> Each question was designed to increase the likelihood of either depression, anxiety disorders, post traumatic stress disorder or substance abuse. If as a result of this screening tool a mental problem was suspected then the participant was referred to the psychiatric nurse for a full assessment.
- A safety assessment tool intended to ascertain the woman's risk of serious injury. Discussion of a safety plan then followed with referral to other health, social, legal or police services.

The safety assessment tool used in the protocol appeared to have been formulated on the assumption that women would present with a serious injury, that her abuser would be living with her and that he might kill her if/when she gets home, or soon thereafter. The predictive value of the assessment needs to be further evaluated in relation to a specific outcome such as frequency of abuse or likelihood of being killed in the immediate future. How accurately the tool represents the most important risk factors in the South African setting needs further study. All risk factor counted equally, for example "Has he threatened to kill you?" scores the same as "Is he

Deleted: 7

Deleted: Therefore a

Deleted: was added

Deleted: 19

Deleted: .

Deleted: Another limitation of the study was t

Formatted: Normal, No bullets or numbering

Formatted: Font: Arial, 12 pt

Deleted: , which seems

Formatted: Font: Arial, 12 pt

Formatted: Font: Arial, 12 pt

Formatted: Font: Arial, 12 pt

Deleted: she

Formatted: Font: Arial, 12 pt

1 presently at home?”, and yet factors may have different weighting in terms of the risk  
2 that they represent.

3  
4  
5 Before leaving, women were given an appointment for a follow-up interview 1-month  
6 later.

**Deleted:** Assessment of risk may also be more valuable in a setting where resources are available to offer the women choices. Nevertheless, participants seemed to find it valuable to receive feedback on their risk from an apparently objective measure.¶

**Formatted:** Font: Arial, 12 pt

### 7 8 **Data collection**

9  
10 Data was extracted from the record of the initial consultation to give a profile of the  
11 management plans. The intended management plan was available to the researcher  
12 at the follow up interview.

13  
14  
15 A different researcher conducted the follow-up interviews. A semi-structured  
16 questionnaire explored adherence to, and perceptions of, the care planned during the  
17 initial consultation (see appendix B). Participants reflected on how useful this had  
18 been, how they felt about their IPV situation now, and whether they had acted upon  
19 their intended plans. This data is based on the detailed notes of the researcher who  
20 recorded participants' responses to the open questions. All data was collected in the  
21 same way. Sometimes narratives were recorded verbatim in the first person and  
22 sometimes paraphrased in the third person.

### 23 24 25 **Data analysis**

26  
27  
28 The quantitative data was analysed by Stellenbosch University's Centre for Statistical  
29 Consultation in terms of simple frequency tables. The qualitative data was coded and  
30 analysed according to the framework method to understand how participants  
31 experienced the intervention.[21]

**Deleted:** 0

### 32 33 34 35 **Findings**

#### 36 37 38 **Profile of the women**

39  
40  
41 Participants comprised 168 females with 56 (33.3%) from urban and 112 (66.6%)  
42 from rural facilities. Overall the mean age was 36.7 years and there was no  
43 significant difference between those who did (36.9 years) and did not (36.0 years)  
44 attend follow up (p=0.59). Women were mostly married (82, 48.8%), cohabiting (36,  
45 21.4%) or currently single (35, 20.8%), and had a mean of 2.5 children (range 0-6  
46 children).  
47  
48  
49  
50  
51  
52  
53  
54  
55  
56  
57  
58  
59  
60

7



1 Table I describes the frequency and range of abuse. Over the 2 years preceding this  
2 study, 96 (57%) participants admitted to being abused more than twenty times,  
3 27(16%) between eleven and twenty times and 45 (27%) had been abused ten or  
4 less times. Each woman experienced on average eight forms of abuse over extended  
5 periods. Emotional abuse was commonest and ranged from verbal abuse, to  
6 restricted contact with family and friends, to control of the woman's freedom to  
7 pursue activities. Physical abuse came a close second, with 115 (68%) having  
8 experienced beatings, 82 (50%) kicked, and alarmingly 55 (34%) had been choked.  
9 There was no difference in the types of abuse between the women who did and did  
10 not attend follow up.

11 Table II describes their degree of risk according to the safety scores and shows that  
12 114 (67.9%) were at high or severe risk. The fact that 77 (45.8%) believed he was  
13 capable of killing indicates the atmosphere of fear pervading the households. Apart  
14 from the danger to the woman herself, 91 (54.2%) admitted that their partners had  
15 threatened to kill their children. Overall the mean safety assessment score was 4.85  
16 and there was also no significant difference between those who did (4.81) and did  
17 not (4.96) attend follow up (p=0.75).

Deleted: ¶

18 Table III shows the high levels of suspected mental problems amongst the women  
19 and how many were referred for further assessment. More than two thirds of women  
20 were suspected of having depression or anxiety disorders, and a third were  
21 specifically suspected of post traumatic stress disorder (PTSD). A quarter of women  
22 were suspected to have problems with substance abuse, most commonly alcohol.  
23 There was no difference in the mental health profile of the women who did and did  
24 not attend for follow up.

Deleted: V

### 25 Impact and value of different aspects of the intervention

26 Out of the 168 women 124 (73.8%) returned for the follow up interview. Table IV  
27 shows key elements of the management plan and the extent to which women acted  
28 on these plans. Significantly, 28/28 (100%) of women followed through on applying  
29 for a protection order, 16/19 (84.2%) proceeded to lay a charge and 23/24 (95.8%)  
30 saw the social worker.

Deleted: II

31 8



1 Table V shows the perceived usefulness of different aspects of the intervention. Over  
2 75% of women found counselling from a NPO, safety assessment and planning,  
3 referral to the psychiatric nurse, applying for a protection order and laying a criminal  
4 charge useful, when it was part of their management plan.  
5  
6  
7

Deleted: I

Deleted: all elements of their suggested management plans useful.

Deleted: NPO

### 8 Therapeutic effect of empathic listening

9  
10 Participants explained that telling their story and feeling understood was in itself  
11 beneficial.  
12

13  
14 "... found the intervention interesting ... felt that ... she could talk to someone and  
15 they actually heard her. She also felt that she could trust the study nurse. She  
16 described the social worker and psychiatric nurse and how they just said, 'yes, yes'  
17 and never really understand. The study nurse gave her advice and told her what she  
18 could do." (036)  
19  
20

21  
22 Being able to be honest in a supportive and non-judgmental interaction was helpful:  
23

24 "No one had ever spoken to her openly before and it was the first time she was able  
25 to be completely honest about everything. She does not want to give up on her  
26 marriage and feels it would be best if she and her husband received counselling  
27 together." (122)  
28  
29

30  
31 The style of interaction was different from usual and facilitated honest reflection on  
32 the situation:  
33

34 "Doctor had asked her before why she was so stressed but was too embarrassed to  
35 tell him. But she was able to talk to (the study nurse) and felt it was good to have  
36 evaluated her situation." (154)  
37  
38

### 39 Value of clinical care

40  
41 Participants appreciated having their overall health as women taken seriously,  
42 particularly since many aspects were examined, which were not usually dealt with.  
43 Many felt relieved to be tested for HIV or assessed for sexually transmitted infections.  
44 Adherence to other ongoing clinical care, such as antiretroviral treatment, appeared  
45 to also improve:  
46  
47  
48

49 "When patient first came she describes herself as tense and hysterical. While talking  
50 to the study nurse she experienced a change inside...hope...Before she met her she  
51  
52

53  
54  
55  
56  
57  
58  
59  
60

1 never thought she could reach the place she is now...(decreased CD4 count,  
2 attending ARV clinic, has gained weight)." (048)  
3  
4  
5

### 6 Safety assessment and planning 7

8 The safety assessment was found to be useful for the following range of reasons:  
9

10 "... made her feel better after hearing that it was wrong to be forced to have sex"  
11 (149);  
12

13 "... opened her eyes as she learnt that he should not hurt her like that" (138);  
14

15 "... saw how dangerous her situation was and decided to get help (a  
16 protection order) (097);  
17

Deleted: n interdict

18 "... made her aware of her own faults as well" (082).  
19  
20  
21

22 Participants cited many reasons why they found the safety plan useful:  
23

24 "She is very afraid as feels he could kill her. Good to discuss what to do and  
25 make a plan – not tell him anything. Just leave." (156)  
26

27 "In the past always had to scramble around and look for things in an emergency  
28 but now all her things are in one place." (123)  
29  
30  
31

### 32 Referral to other resources 33

34 Knowing about the available resources and being offered referral was appreciated:  
35

36 "The intervention helped a lot. She did not know that there were so many people to  
37 help her. She had been to social workers before, but it is not the same. She now  
38 does not feel alone anymore." (025)  
39  
40

41 The referral letter had helped to access services required:  
42

43 "...before "x" court had refused to help her, but with letter they gave her a protection  
44 order. Now she feels happy." (053)  
45  
46

47 Many participants expressed relief at discovering they have rights, and where to find  
48 help when they need it. Many expressed that the questions and information opened  
49  
50  
51

52  
53 10  
54  
55  
56  
57  
58  
59  
60

1 up a new world, linking them to resources and showing ways to change their  
2 circumstances.  
3

#### 4 **Problems with police**

5  
6 Most complaints referred to unsympathetic, impersonal, indiscreet or corrupt police.  
7  
8 One participant's partner had paid the police off while another's recurrently abusive  
9 behavior continued despite her protection order. Another explained when she had  
10 applied for a protection order she was not given a copy of the temporary order. When  
11 she laid a charge, she received a case number, but no copy of the statement or  
12 medical report. This failure of authorities to provide copies was commonly reported  
13 by participants.  
14  
15  
16

#### 17 **Negative reactions to the intervention**

18  
19 Digging up the past had upset a participant. Another complained that she felt very  
20 frightened after the interview. One said that things were worse at home because  
21 following the intervention she informed her husband that she intended to divorce him  
22 and he threatened to take the children and jump under a train.  
23  
24 Deleted:

#### 25 **Suggestions to improve the help offered**

26  
27 A strong theme was the need for a support group:  
28

29 "She would like to talk to other women who have been through the same situations.  
30 She would like to make friends and learn from other people." (083)  
31

32  
33 A professional rural woman desired referral to services outside her community as she  
34 felt too exposed to access services within it. Another would only see a female  
35 counsellor. Some wanted their partner to be "spoken to" or couple counselling to  
36 prevent the impression that only women need help. Some resented a perceived onus  
37 on women to resolve problems rather than zero tolerance for men's abusive  
38 behaviour and proactive efforts to get functional interventions in place. Other  
39 participants requested practical assistance such as written advice or help with  
40 completing protection order application. One woman expressed a need for solitude  
41 and space to reflect.  
42  
43  
44  
45  
46  
47

#### 48 **Improved mental state**

49  
50  
51  
52  
53 11  
54  
55  
56  
57  
58  
59  
60

1 At least thirty five of the participants reported an improved mental state in terms of  
2 their mood, sociability or sense of well-being as well as decreased anxiety, suicidal  
3 ideation and alcohol abuse. Enhanced parenting emerged frequently as a theme.  
4

5  
6 “I used to feel sad all the time. I used to feel useless but now I feel responsible. I can  
7 take care of my children now. When I was drinking every day I would take them to a  
8 woman to look after them. Now I enjoy my kids and my life more ... since I went to  
9 press charges we have not been together and he has not hurt me either.” (047)  
10  
11

12  
13 “I was a wreck, but when I left her office I could face the world squarely again. She  
14 taught me things about myself I did not know. My problems were not solved then and  
15 there but I can now notice what I did not before and I feel better about myself as a  
16 person.” (166)  
17  
18

### 19 **Reduced isolation**

20  
21 Some participants found that the intervention encouraged them to reduce their  
22 isolation by reconnecting with trustworthy friends or family members in a more open  
23 and honest way:  
24  
25

26  
27 “Communication ... has improved. It is easier for her to disagree and she feels more  
28 independent, like she could manage without him. She had isolated herself quite a bit,  
29 but is now starting to reach out to her friends again.” (026)  
30  
31

### 32 **More aware of their rights**

33  
34 Women described no longer “feeling lost” since they learnt about potentially helpful  
35 resources:  
36  
37

38 “For the first time in two years, she phoned the police and used her protection order.  
39 She appeared in front of the magistrate and since then he has lived with his family.”  
40 (021)  
41  
42

43 Many discussed a notable improvement in the partners’ behaviour in response to a  
44 letter the researcher had written to the police and/or magistrates’ court. In most  
45 cases where the criminal justice system was effectively engaged the abusive  
46 behaviour stopped completely, usually due to fear of jail.  
47  
48

### 49 **Taking action**

50  
51  
52  
53 12  
54  
55  
56  
57  
58  
59  
60

1 On follow-up, some reported having taken action to enhance the quality of their lives.  
2  
3 Eleven women ended the relationship after the intervention and reported at follow-up  
4 how relieved they felt.

5  
6 "...after interview she got a protection order and ended her relationship with her  
7 gangster boyfriend who uses tic" (metamphetamine). (104)  
8  
9

### 10 Improved relationships

11 Many participants described improvement in their family relationships:

12  
13  
14 "I went to a support group for abused women. A lot changed inside myself, like now I  
15 know how to talk to my husband. I was always angry and shouting at him, now we  
16 communicate better. I am much kinder to the kids. I feel happy now. Before I felt sad,  
17 wanted to cry and stay alone." (016)  
18  
19

### 20 Change in own behaviour

21  
22 Many participants described how the intervention had motivated change in their own  
23 behavior. Reduced alcohol abuse was a particularly frequent effect, with enhanced  
24 parenting an attendant theme.  
25  
26

27  
28 "Our relationship is going much better than before. I discussed certain things with him  
29 and he understood me. I am drinking much less than before and going to evening  
30 songs again. I never wanted to work on Saturdays but now I am". (164)  
31  
32

33 "It made her realise that she can no longer continue to use alcohol because it's  
34 detrimental to her baby. She feels she can talk about things easier and that she  
35 came out a stronger person, able to take a stand." (166)  
36  
37

38 "Yes, I am different inside. When he tries to provoke me with verbal abuse when  
39 drunk, I don't allow him to make me angry. He doesn't even listen to me, but I take  
40 me seriously." (007)  
41  
42

### 43 Change in partners' behaviour

44  
45 Change in partners' behaviour was also reported and 56 reported an improved  
46 relationship with their partner:  
47  
48

49 "There has been great change in her life. The intervention was very useful because  
50 the results have made her feel very happy. The situation at home has improved very  
51  
52

53 13  
54  
55  
56  
57  
58  
59  
60

1 much. Her husband has even been working in their garden and helping the children  
2 with homework - never before." (065)

3  
4  
5 "She found the whole experience useful because she got a protection order and  
6 there is now someone to stop him. Even though he was famous for his actions locally  
7 and people were aware of his behaviour, nothing was ever done. The protection  
8 order however has changed his behaviour." (078)

### 11 No real change

12 Thirty nine participants reported that there had been no real change. The intractable  
13 challenges that pervaded these responses often involved alcoholism in either or both  
14 partners, financial constraints, HIV infection as well as participants' inertia to follow  
15 up on referrals made. Even so, some reported that they had found the process  
16 useful.  
17

18  
19  
20  
21 "No real change – he continues to withhold pay while expecting money from her with  
22 which to buy alcohol. Locked her and kids out of home while he was away drinking,  
23 very abusive on return. She wants a divorce." (133)

24  
25 A common refrain was, "When he is not drunk, he is such a nice guy."

26  
27 Another trap was expressed as follows:

28  
29  
30 "She needs the money that he provides ... a protection order will make him angry  
31 and he will not be able to work if he is in jail. She is still very scared of him but he  
32 gets angry if she addresses his behavior. He must always be right." (156)

### 35 Discussion

36  
37 Women were suffering simultaneously from multiple types of abuse and were mostly  
38 at high or severe risk of injury and death. Women showed strong adherence to the  
39 components of their care plan, particularly applying for a protection order, laying a  
40 charge, referral to a social worker and obtaining a pregnancy test. Women described  
41 all aspects of the intervention as helpful, particularly counselling from a NPO, the  
42 safety assessment and planning, applying for a protection order, laying a criminal  
43 charge and seeing the psychiatric nurse.

44  
45  
46  
47  
48  
49 Overall 11 (9%) women reported that they had ended their relationship, 56 (45%) that  
50 their relationship had improved and 39 (31%) that there was no change. These

51  
52  
53  
54  
55  
56  
57  
58  
59  
60

Deleted: and

Deleted: NPO

findings are congruent with previous work that suggests that most IPV survivors want the violence, not the relationship, to end.[22] Women reported significant benefits to their mental health, reduced alcohol abuse, increased self-efficacy and reduced abusive behavior.

Deleted: Contrary to popular belief,

Deleted: 8

Deleted: .

Deleted: improved relationships,

Two characteristics of the intervention appeared particularly important: the style of interaction with the nurse and the comprehensive nature of the assessment.

Deleted: Referral to the psychiatric nurse and how this was valued speaks to the enormity of the psychosocial stressors characterising our context. Indeed, South African society is so fraught with trauma and violence, that care from a psychiatric nurse is understood to provide a vital safety net, rather than as grounds for declaring someone mentally unfit. ¶

Being encouraged to tell their story and being listened to with genuine interest and care emerged as key features of the interview which participants valued. This echoes other studies which speak of IPV survivors' need for compassionate, uninterrupted listening.[23,24] Clearly indicating to patients that violence is not a taboo topic, is in itself a vital therapeutic component of any intervention.[25] The safety assessment provided feedback on how the situation is perceived relative to a different norm, thus enhancing the discrepancy between 'normalcy' and their current situation. Our findings are congruent with other studies that emphasise the value of empathic, non-judgmental interaction.[26,27,28]

Deleted: 1,22

Deleted: 3

Deleted: 24,

Deleted: 5

Deleted: 6

This study addresses a key gap in the literature since it provides evidence of the benefits of a comprehensive intervention for IPV.[9,10,11] In order to be comprehensive, assessment and care should include clinical, psychological, social, legal and advocacy components. Clinical aspects include preventing unwanted pregnancy, sexually transmitted infections and HIV testing. Psychological refers to identification and treatment of potential mental health problems. Social encompasses referral to support groups, social workers and safety planning. Legal includes referral for a protection order, which was found more effective than laying a criminal charge. Information about rights and local resources was important.

Deleted: management

Deleted: , and care for,

Advocacy and referral to relevant resources has the potential to interrupt and prevent recurrent IPV and associated trauma while enhancing IPV survivors' quality of life.[9] Six months of advocacy has been found to improve emotional health, personal safety, health care and the ability to get medication or treatment while decreasing unhealthy coping behaviours.[29]

Deleted: 7

**Strengths and limitations**

The hidden nature of IPV and the study design make it impossible to determine what proportion of women suffering from IPV in these communities attended the primary care facilities. It is also not possible to determine what proportion of women who did

Deleted: For eleven participants, the intervention led to termination of the abusive relationship much to their expressed relief. However in almost one half of the sample (56, 45%) it resulted in improved relationships with partners. Contrary to popular belief, most IPV survivors want the violence, not the relationship, to end.[28]¶

15



attend were identified. Fewer women than expected were identified and referred to the study and the issues related to screening are presented elsewhere.[13] It is possible that those women who disclosed were suffering from more severe forms of IPV and therefore more likely to seek help.

The mixed methods facilitated in depth understanding of how women experienced the intervention. Follow up however was limited to 1-month so the study cannot determine if changes were sustained or if additional changes occurred subsequently. A longitudinal evaluation measuring the effect of the intervention on the abuse could provide further evidence of effectiveness.

**Deleted:** Fewer women than expected were identified and referred to the study and the issues related to screening are presented elsewhere.[13]

### Implications and recommendation

The study provides evidence that the intervention was perceived as useful by most participants. Implementation in primary care will require attention to enabling an empathic communication style and a comprehensive assessment and care plan. A proposed model of how the intervention can be integrated into local primary care is described elsewhere.[30]

**Deleted:** Another limitation of the study was the safety assessment, which seems to have been formulated on the assumption that she would present with a serious injury, that her abuser would be living with her and that he might kill her if/when she gets home, or soon thereafter. The predictive value of the assessment needs to be further evaluated in relation to a specific outcome such as frequency of abuse or likelihood of being killed in the immediate future. How accurately the tool represents the most important risk factors in the South African setting needs further study. All risk factor counted equally, for example "Has he threatened to kill you?" scores the same as "Is he presently at home?", and yet factors may have different weighting in terms of the risk that they represent. Assessment of risk may also be more valuable in a setting where resources are available to offer the women choices. Nevertheless, participants seemed to find it valuable to receive feedback on their risk from an apparently objective measure.

**Deleted:** 29

The evaluation of this protocol has provided sufficient evidence to the Department of Health to pilot the model in the Western Cape. While this intervention focuses on women, future research should include working with men. As the model is implemented further research should monitor the identification of women via case finding in primary care compared to the expected prevalence in the community served, explore which women disclose to and take up services initiated by health professionals and evaluate benefits in the longer term. It may also be useful to relate the introduction of the model to outcomes such as mortality from inter-personal violence amongst women at the sub-district level.

The communication style mirrors that of motivational interviewing which helps people make difficult decisions about behavior change.[31] Characterised by empathy, clear direction, collaboration, evocation of the client's perspective and solutions, its approach respects autonomy. Training in motivational interviewing as well as the conceptualisation of IPV as a chronic rather than an acute condition should be considered in the roll-out of this model.

**Deleted:** 0



## Conclusion

Women diagnosed with IPV in primary care perceive clear benefit, at least in the short term, from an intervention characterised by both empathic, non-judgmental listening and a comprehensive approach to assessing and managing the clinical, mental, social and legal aspects. District managers should integrate this approach into primary care services and evaluate it further.

## Reference List

1. Norman R, Bradshaw D, Schneider M, et al. Estimating the burden of disease attributable to interpersonal violence in South Africa in 2000. *S Afr Med J* 2007;97(8):653-656.
2. Abrahams N, Jewkes R, Martin L, et al. Mortality of Women From Intimate Partner Violence in South Africa: A National Epidemiological Study. *Violence Vict* 2009;24(4):546-556.
3. De Villiers P. Home Violence in South Africa: Surveillance during 1996 by SASPREN, a Sentinel Network of general/family practitioners. *SASPREN News* 1998 September/October;87-89.
4. Ratele K. Masculinity and male mortality in South Africa. *African Safety Promotion: A Journal of Injury and Violence Prevention* 2008;6(2):19-41.
5. Gouws A. *Unthinking Citizenship*. Cape Town: UCT Press; 2005.
6. Domestic Violence Act 116 of 1998 [Online] [s.a.] [Accessed 2011, July 11]; Available: [Error! Hyperlink reference not valid.](#)
7. Jewkes R. Reflections on Gender Violence in the South African Public Health Agenda. *Development* 2001;44(3):64-68.
8. Garcia-Moreno C, Jansen HAFM, Ellsberg M, et al. World Health Organization's multi-country study on women's health and domestic violence: initial results on prevalence, health outcomes and women's responses. Geneva: World Health Organization Press; 2005.
9. McFarlane JM, Goff JY, O'Brien JA, et al. Secondary Prevention of Intimate Partner Violence: A Randomized Controlled Trial. *Nurs Research* 2006;55(1):52-61.
10. Wathen CN, MacMillan HL. Interventions for Violence Against Women: Scientific Review. *JAMA* 2003;289(5):589-600.

Deleted: <http://search.sabinet.co.za>

- 1  
2  
3  
4  
5  
6  
7  
8  
9  
10  
11  
12  
13  
14  
15  
16  
17  
18  
19  
20  
21  
22  
23  
24  
25  
26  
27  
28  
29  
30  
31  
32  
33  
34  
35  
36  
37  
38  
39  
40  
41  
42  
43  
44  
45  
46  
47  
48  
49  
50  
51  
52  
53  
54  
55  
56  
57  
58  
59  
60
11. Ramsay J, Richardson J, Carter YH, et al. Should health professional screen women for domestic violence? Systematic review. *Br Med J* 2002;325:1-13,1419.
  12. Cherniak D, Grant L, Mason R, et al. Intimate Partner Violence Consensus Statement. *J Obstet Gynaecol Can* 2005;27(4):365-418.
  13. [Joyner K & Mash B. Recognizing Intimate Partner Violence in Primary Care: Western Cape, South Africa. PLoS ONE \(in press\).](#)
  14. Joyner K. Health Care for Intimate Partner Violence: Current Standard of Care and Development of Protocol Management. [dissertation]. Stellenbosch: Stellenbosch University; 2009. [Accessed 2011, August 31]; Available: <http://hdl.handle.net/10019.1/2515>.
  15. Janssen P, Daschal-Weichhendler H, McGregor M. Assessment for Intimate Partner Violence: Where do we stand? *J Am Board Fam Med* 2006;19(4):413-415.
  16. Jewkes R. Preventing domestic violence. *Br Med J* 2002;324:253-254.
  17. Bradley F, Smith M, Long J, et al. Reported frequency of domestic violence: cross sectional survey of women attending general practice. *Br Med J* 2002;324:274-278.
  18. Martin LJ, Jacobs T. Screening for Domestic Violence: A Policy and Management Framework for the Health Sector. Cape Town: Institute of Criminology, University of Cape Town, 2003.
  19. Global Programme on Evidence for Health Policy. Putting Women's Safety First: Ethical and Safety Recommendations for Research on Domestic Violence Against Women. Geneva: World Health Organization; 1999. [Accessed 2011, September 2]; Available: [http://whqlibdoc.who.int/hq/1999/WHO\\_EIP\\_GPE\\_99.2.pdf](http://whqlibdoc.who.int/hq/1999/WHO_EIP_GPE_99.2.pdf)
  20. [Mash B. How to design education on mental disorders for general practitioners in South Africa, SA Fam Pract 2002; 25\(5\): 4-10](#)
  21. [Ritchie J, Spencer L. Qualitative data analysis for applied policy research.](#) In Bryman A, Burgess R, editors. *Analysing qualitative data*. London: Routledge; 1993. pp. 173-194.
  22. Mathews S, Abrahams, N. Combining Stories and Numbers: An Analysis of the Impact of the Domestic Violence Act (No. 116 of 1998) on Women. Tygerberg: The Gender Advocacy Programme and The Medical Research Council; 2001.

**Formatted:** Font: Arial, Not Bold, Not Highlight

**Formatted:** List Paragraph, Right: 0 pt, Space Before: 0 pt, After: 12 pt, Add space between paragraphs of the same style, Don't keep with next, Don't adjust space between Latin and Asian text, Don't adjust space between Asian text and numbers

**Deleted:** <#>Mash B. The development of distance education for general practitioners on common mental disorders through participatory action research. [unpublished dissertation] Stellenbosch: Stellenbosch University; 2002.¶

- 1 23. Limandri B. The Therapeutic Relationship With Abused Women: Nurses'  
 2 Responses that Facilitate or Inhibit Change. J Psychosoc Nurs Ment Health  
 3 Serv 1987;25(2):9-16.  
 4  
 5 24. Bauer HM, Rodriguez MA. Letting Compassion Open the Door: Battered  
 6 Women's Disclosure to Medical Providers. Camb Q Healthc Ethics  
 7 1995;4:459-465.  
 8  
 9 25. Chescheir N. Violence Against Women: Response From Clinicians. Ann  
 10 Emerg Med 1996;27(6):766-768.  
 11  
 12 26. Rhodes KV, Frankel RM, Levinthal N, et al. "You're not a Victim of Domestic  
 13 Violence, Are You?" Provider-Patient Communication about Domestic  
 14 Violence. Ann Int Med 2007;147:620-627.  
 15  
 16 27. Duxbury F. Recognising domestic violence in clinical practice using the  
 17 diagnoses of posttraumatic stress disorder, depression and low self-esteem. Br  
 18 J Gen Pract 2006;56:294-300.  
 19  
 20 28. Stenius VJK, Veysey BM. "It's the Little Things": Women, Trauma and  
 21 Strategies for Healing. J Interpers Viol 2005;20:1155-1174.  
 22  
 23 29. Hathaway JE, Zimmer B, Willis G, et al. Perceived Changes in Health and  
 24 Safety Following Participation in a Health Care-Based Domestic Violence  
 25 Program. J Midwifery Womens Health 2008;53(6):547-555.  
 26  
 27 30. \_\_\_\_\_  
 28  
 29 30. Joyner K & Mash B. How to provide comprehensive, appropriate care for  
 30 survivors of intimate partner violence. In Joyner K, editor. Aspects of Forensic  
 31 Medicine: An Introduction for Healthcare Professionals. Cape Town: Juta;  
 32 2010. pp. 87-100.  
 33  
 34 31. Rollnick S, Miller WR, Butler CC. Motivational Interviewing in Health Care:  
 35 [Helping Patients Change Behavior](#). New York: The Guilford Press; 2008.  
 36  
 37  
 38  
 39  
 40  
 41  
 42  
 43  
 44  
 45  
 46  
 47  
 48  
 49  
 50  
 51  
 52  
 53  
 54  
 55  
 56  
 57  
 58  
 59  
 60

**Deleted:** Mathews S, Abrahams, N. Combining Stories and Numbers: An Analysis of the Impact of the Domestic Violence Act (No. 116 of 1998) on Women. Tygerberg: The Gender Advocacy Programme and The Medical Research Council; 2001.

**Formatted:** Numbered + Level: 1 + Numbering Style: 1, 2, 3, ... + Start at: 30 + Alignment: Left + Aligned at: 18 pt + Tab after: 0 pt + Indent at: 36 pt

**Deleted:** Miller, W. &

**Deleted:** ,

**Deleted:** .

**Deleted:** Preparing People for

**Deleted:**

**Deleted:** 2

Table I: Prevalence of different types of abuse

| Abuse behaviour        | All<br>N = 168<br>n (%) | Follow up<br>N=124<br>n (%) | No follow up<br>N=44<br>n (%) | P value |
|------------------------|-------------------------|-----------------------------|-------------------------------|---------|
| <b>Emotional</b>       |                         |                             |                               |         |
| Shouting               | 139 (82.7)              | 105 (84.7)                  | 34 (77.3)                     | 0.27    |
| Name calling           | 136 (81.0)              | 102 (82.3)                  | 34 (77.3)                     | 0.47    |
| Threatening            | 94 (56.0)               | 69 (55.6)                   | 25 (56.8)                     | 0.89    |
| Restricting contact    | 84 (50.0)               | 64 (51.6)                   | 20 (45.4)                     | 0.48    |
| Controlling activities | 63 (37.5)               | 47 (37.9)                   | 16 (36.4)                     | 0.86    |
| Accusations            | 19 (11.3)               | 17 (13.7)                   | 2 (4.5)                       | 0.07    |
| <b>Physical</b>        |                         |                             |                               |         |
| Hit                    | 115 (68.5)              | 86 (69.3)                   | 29 (65.9)                     | 0.67    |
| Pushed                 | 90 (53.6)               | 56 (45.2)                   | 26 (59.1)                     | 0.11    |
| Kicked                 | 82 (48.8)               | 46 (37.1)                   | 23 (52.3)                     | 0.08    |
| Use of weapon          | 69 (41.1)               | 65 (52.4)                   | 25 (56.8)                     | 0.61    |
| Choked                 | 57 (33.9)               | 41 (33.1)                   | 16 (36.4)                     | 0.69    |
| Burnt                  | 8 (4.8)                 | 5 (4.0)                     | 3 (6.8)                       | 0.47    |
| Hair pulled            | 2 (1.2)                 | 2 (1.6)                     | 0 (0.0)                       | 0.27    |

Table I: Prevalence of different types of abuse

| <b>Sexual</b>         |           |           |           |      |
|-----------------------|-----------|-----------|-----------|------|
| Infidelity            | 72 (42.9) | 53 (42.7) | 19 (43.2) | 0.96 |
| Sexual coercion       | 55 (32.7) | 42 (33.9) | 13 (29.5) | 0.60 |
| Unwanted touching     | 41 (24.4) | 34 (27.4) | 7 (15.9)  | 0.11 |
| STIs                  | 41 (24.4) | 32 (25.8) | 9 (20.4)  | 0.47 |
| <b>Financial</b>      |           |           |           |      |
| Withholding money     | 72 (42.9) | 55 (44.3) | 17 (38.6) | 0.51 |
| Controlling decisions | 25 (14.9) | 19 (15.3) | 6 (13.6)  | 0.78 |
| Taking money          | 23 (13.7) | 19 (15.3) | 4 (9.1)   | 0.28 |

Table II: Safety assessment score

|                                          | n = 168 | %    |
|------------------------------------------|---------|------|
| <b>Safety assessment score</b>           |         |      |
| Not done                                 | 3       | 1.8  |
| Caution (0–3)                            | 50      | 29.8 |
| High risk (4–7)                          | 87      | 51.8 |
| Severe risk (8–11)                       | 27      | 16.1 |
| <b>Safety assessment fields</b>          |         |      |
| Threatened with physical violence?       | 125     | 74.4 |
| Threatened children with violence?       | 109     | 64.9 |
| Firearm in house?                        | 102     | 60.7 |
| Made a death threat?                     | 92      | 54.8 |
| Threatened to kill children?             | 91      | 54.2 |
| Capable of killing?                      | 77      | 45.8 |
| Substance use prior to last abuse?       | 62      | 36.9 |
| Police intervention necessary?           | 54      | 32.1 |
| Is he in the house?                      | 41      | 24.4 |
| Has abuse escalated in severity?         | 35      | 20.8 |
| Received medical treatment for injuries? | 33      | 19.6 |

Table III: Referred for assessment of mental health problems

| Referred for further assessment for: | All<br>N = 168<br>n (%) | Follow up<br>N=124<br>n (%) | No follow up<br>N=44<br>n (%) | P value |
|--------------------------------------|-------------------------|-----------------------------|-------------------------------|---------|
| Depression                           | 110 (65.5)              | 79 (64.7)                   | 31 (72.1)                     | 0.37    |
| PTSD                                 | 65 (38.7)               | 44 (35.5)                   | 21 (48.8)                     | 0.12    |
| Anxiety                              | 121 (72.0)              | 91 (74.6)                   | 30 (69.8)                     | 0.24    |
| Substance abuse                      | 42 (25.0)               | 31 (25.0)                   | 11 (25.6)                     | 0.13    |

Table IV: Adherence of women to plans made by 1-month follow up (N=124)

|                                                   | Management plan |      | Action |      | Adherence |
|---------------------------------------------------|-----------------|------|--------|------|-----------|
|                                                   | N               | %    | n      | %    | n/N %     |
| Wants HIV test                                    | 56              | 45.2 | 31     | 25.0 | 55.4      |
| Wants rapid plasma reagin test                    | 25              | 20.2 | 10     | 8.1  | 40.0      |
| Wants pregnancy test                              | 6               | 4.8  | 10     | 8.1  | 100.0     |
| Intends to obtain a protection order              | 28              | 22.6 | 28     | 22.6 | 100.0     |
| Intends to lay a charge                           | 19              | 15.3 | 16     | 12.9 | 84.2      |
| Referral to <a href="#">NPO</a> for legal support | 15              | 12.1 | 7      | 5.6  | 46.7      |
| Referral to <a href="#">NPO</a> counselling       | 32              | 25.8 | 12     | 9.7  | 37.5      |
| Referral to psychiatric nurse                     | 58              | 46.8 | 28     | 22.6 | 48.3      |
| Referral to social worker                         | 24              | 19.4 | 23     | 18.5 | 95.8      |

Deleted: NPO

Deleted: NPO

Deleted: NPO

[NPO](#)=Non profit organisation

**Table V Perceived usefulness of different aspects of the intervention**

| Intervention                                  | N   | Very helpful / helpful |      | Don't know |      | Unhelpful |      |
|-----------------------------------------------|-----|------------------------|------|------------|------|-----------|------|
|                                               |     | n                      | %    | n          | %    | n         | %    |
| Going to <a href="#">NPO</a> for legal advice | 7   | 4                      | 57.2 | 2          | 28.6 | 1         | 14.3 |
| Going to social worker                        | 23  | 16                     | 69.6 | 4          | 17.4 | 3         | 13   |
| Going to <a href="#">NPO</a> for counselling  | 12  | 9                      | 75.0 | 2          | 16.7 | 1         | 8.3  |
| Safety plan                                   | 102 | 77                     | 75.5 | 16         | 15.7 | 9         | 8.8  |
| Safety assessment                             | 106 | 85                     | 80.1 | 15         | 14.2 | 6         | 5.7  |
| Protection order                              | 28  | 23                     | 82.1 | 1          | 3.6  | 4         | 14.3 |
| Going to psychiatric nurse                    | 28  | 26                     | 92.8 | 0          | 0    | 2         | 7.1  |
| Laying criminal charge                        | 16  | 15                     | 93.8 | 0          | 0    | 1         | 6.3  |

[NPO](#)=Non profit organisation

Deleted: NPO  
 Formatted: Font: Arial  
 Formatted: Font: Arial  
 Formatted: Font: Arial  
 Formatted: Font: Arial  
 Deleted: NPO  
 Formatted: Font: Arial  
 Deleted: NPO

**Acknowledgements:**

Critical review: Julia Blitz

**Competing Interests:**

The authors declare no conflict of interests.

**Funding:**

This work was supported by two National Research Foundation Thuthuka grants (TTK2006052200003 & TTK2005072900031) and two Harry and Doris Crossley awards from Stellenbosch University.

**Contributor Statement**

Conception and design: K Joyner and R Mash  
 Data collection: K Joyner, N Bakumeni, M Abrahams, L Le Roux, K Thomson  
 Analysis of the data: K Joyner, M Kidd (statistician)  
 Interpretation of the data: K Joyner, R Mash  
 Drafting of the article: K Joyner and R Mash  
 Critical revision of the article for important intellectual content: K Joyner, R Mash and J Blitz

24



1  
2  
3  
4  
5  
6  
7  
8  
9  
10  
11  
12  
13  
14  
15  
16  
17  
18  
19  
20  
21  
22  
23  
24  
25  
26  
27  
28  
29  
30  
31  
32  
33  
34  
35  
36  
37  
38  
39  
40  
41  
42  
43  
44  
45  
46  
47  
48  
49  
50  
51  
52  
53  
54  
55  
56  
57  
58  
59  
60

Final approval of the article: K Joyner and R Mash

For peer review only

25

## **COREQ 32-ITEM CHECKLIST** (Tong, Sainsbury & Craig, 2007)

### **Domain 1: Research team and reflexivity**

#### **Personal characteristics**

##### **1. Interviewer/Facilitator**

Kate Joyner: conducted first and follow-up interviews and focus groups

##### **2. Credentials** *M.Soc. Sc; Advanced Diploma in Psychiatric Nursing; Diploma in General, Community and Psychiatric Nursing and Midwifery.*

##### **3. Occupation** Programme coordinator: Mental Health and Gender-Based Violence Nursing, Stellenbosch University; doctoral student.

##### **4. Gender** Female

##### **5. Research experience**

Conceptualised and supervised a student project which subsequently won the Dumo Baqwa award for best original research article in South African Journal of Family Practice 2007: Joyner K. et al. Emergency care provision for, and psychological distress in, survivors of domestic violence. SA Fam Pract 2007;49(3).

##### **Training**

Active in the NGO sector since 1985

Three social science degrees at UCT, was busy doing a doctorate in Social Science Research Methodology.

Seven years of integrating how to provide care for those affected by gender-based violence into all undergraduate, postgraduate and non-degree purpose training at Stellenbosch University.

Organised and participated in all cooperative inquiry group meetings.

##### **1. Facilitator**

Robert Mash: conducted a focus group, and facilitated all cooperative inquiry group meetings

##### **2. Credentials** *PhD; MBChB; MRCGP; DCH; CRCOG*

##### **3. Occupation** Assoc. Professor in Family Medicine and Primary Care, Stellenbosch University

##### **4. Gender** Male

##### **5. Research experience and training** Research projects currently focus on chronic diseases (diabetes, asthma), training of family physicians; defining family medicine in Sub-Saharan Africa, motivational interviewing, a survey for reasons for encounter and diagnoses in South African primary care. Supervisor of 30 Masters and 7 Doctoral students at Stellenbosch University.

##### **1. Interviewer/Facilitator**

Maggie Abrahams: conducted first and follow up interviews and a focus group

##### **2. Credentials** *Diploma in Community Health Science and*

*Administration, Registration as Midwife and Psychiatric Professional Nurse*

3. **Occupation** Research assistant/study nurse; Masters student.
  4. **Gender** Female
  5. **Experience** No former research experience, three decades of nursing experience in the clinical field.
- Training** Three day training before beginning data collection and participated in five cooperative inquiry group meetings.

1. **Interviewer**  
Nobuhle Bakumeni: conducted first interviews
  2. **Credentials** *Diploma in General Nursing Science and Midwifery; Certificate in Advanced Health Management Programme*
  3. **Occupation** Nurse clinician at HIV/ARV clinics in Eastern Cape; Masters student.
  4. **Gender** Female
  5. **Research experience** Worked as research assistant and facilitator to improve water sanitation in East London for 9 months on a Water Commission research project.
- Training** Two day training before beginning data collection and one cooperative inquiry group meeting during her involvement in the research process. Principal author also met with Nobuhle twice a week during data collection process to provide supervision (support).

1. **Interviewer**  
Liezal Le Roux: conducted follow-up interviews
  2. **Credentials** *B Cur; Registration as General, Community and Psychiatric Professional Nurse and Midwife*
  3. **Occupation** Research assistant at Medical Research Council's Unit for Anxiety and Stress Disorders.
  4. **Gender** Female
  5. **Research experience**  
Student research project supervised by Joyner and subsequent employment as research assistant, see occupation above.
- Training**  
Two day training before data collection began.

1. **Interviewer**  
Kirsten Thomson: conducted follow-up interviews
2. **Credentials** *Bachelor of Arts*
3. **Occupation** Research assistant; Honours degree in History student
4. **Gender** Female
5. **Research experience**  
Kirsten was working as a research assistant on the Groote Schuur History project. She had participated in 19 interviews and was coordinating the study.

**Training** Training discussions in meetings with Kate, and participated in three cooperative inquiry group meetings.

## Relationship with participants

### 6. Relationship established

Most participants had no prior relationship with interviewers, except in case of Maggie Abrahams who was the full time study nurse in the region she had grown up in.

### 7. Participant knowledge of the interviewer

Participants were informed that she was the study nurse, and that her role was to provide comprehensive assistance to them. Participants were informed that the role of the follow-up interviewer was to understand whether the intervention (1<sup>st</sup> interview) had been of use to them.

### 8. Interviewer characteristics

Participants only had positive things to say about all interviewers. Their experience of the intervention was surprisingly satisfactory – perhaps due to the historical and continuing neglect of intimate partner violence as a legitimate, important health concern. Significantly also, all first interviewers had left or were living in abusive relationships. Out of 11 potential interviewers, these three committed to participating in the project and from participant's feedback it is clear that their approach was a non-judgmental one of insight, compassion and respect .

## Domain 2: study design

### Theoretical framework

#### 9. Methodological orientation and Theory

Professional action research framework for a mixed method intervention study

### Participant selection

**10. Sampling** 168 participants choose to participate in the intervention

**11. Method of approach** Female patients, 18 and older, were screened during their healthcare consultation

**12. Sample size** 168 women, 18 and older.

1  
2 **13. Non-participation** No idea because it wasn't a feature of  
3 the methodology  
4

5 **Setting**  
6

7 **14. Setting of data collection** Primary health care facilities (CHCs)  
8  
9

10 **15. Presence of non-participants** Occasionally the participant's child was  
11 present.  
12

13 **16. Description of sample** The sample consisted primarily of poor, relatively  
14 uneducated, African women and women of mixed origin.  
15  
16

17 **Data Collection**  
18

19 **17. Interview guide**

20 The first interview involved piloting a protocol for the screening and  
21 management of intimate partner violence (Martin L, Jacobs T. Screening for  
22 Domestic Violence: A Policy and Management Framework for the Health  
23 Sector. Cape Town: Institute of Criminology, University of Cape Town, 2003. ).  
24 Professional action research methodology enabled us to modify it for use in  
25 the primary health care sector.  
26

27 The research team compiled the follow-up interview tool to assess  
28 participant's experience of the intervention and what action they had  
29 subsequently taken to address the care plan she had formulated with the  
30 study nurse/researcher.  
31  
32  
33  
34

35 **18. Repeat interviews**

36 Nil  
37  
38

39 **19. Audio/visual recording**

40 Focus groups were audio recorded with a digital device.  
41 First and follow-up interviews were manually transcribed.  
42  
43  
44

45 **20. Field notes**

46 Field notes were made and analysed as part of the bigger study.  
47  
48

49 **21. Duration**

50 First interview (intervention): 60 – 90 minutes

51 Follow-up interview: 30 minutes

52 Focus groups: 60 minutes  
53  
54  
55

56 **22. Data saturation**

57 Yes, discussed in supervision with Prof Mash and cooperative inquiry group  
58 meetings.  
59  
60

**23. Transcripts returned**

No

**Domain 3: analysis and findings****24. Number of data coders**

Coded by principal author and verified by three co-researchers.

**25. Description of the coding tree**

Evident from results

**26. Derivation of themes**

Derived from the data

**27. Software**

SPSS for quantitative data

Manual coding of qualitative data according to Framework Method.

**28. Participant checking**

Yes, that was the purpose of the follow-up interview and is reported on in the article submitted.

**Reporting****29. Quotations presented**

Multiple participants' quotations are presented to illustrate themes.

**30. Data and findings consistent**

Yes

**31. Clarity of major themes**

Yes, major themes are clearly presented in the findings.

**32. Clarity of minor themes**

Yes, there is a discussion of minor themes
